# Supplementary material for: Dynamic Changes of Ascorbic Acid Occurring During Fruit Development and Ripening of Actinida Latifolia and Their Associated Molecular Mechanisms Deciphered by Weighted Gene Co-Expression Network Analysis
Source: Research Square preprint supplement (doi:10.21203/rs.3.rs-133017/v1), 2020-12-31
Supplement: Supplementary file 1 [file 18b5b02ade2f896a44bf937d.xlsx]

## Sheet: Table S1
Table S1. Integrated functional annotation of transcirpts of Actinidia latifolia
#GeneID	COG_class	COG_class_annotation	GO_annotation	KEGG_annotation	KEGG_pathway	KOG_class	KOG_class_annotation	Pfam_annotation	Swissprot_annotation	eggNOG_class	eggNOG_class_annotation	nr_annotation
F01_transcript/28843	--	--	Cellular Component: integral component of membrane (GO:0016021);;	K13347|4.70169e-81|fve:101298202|K13347 peroxisomal membrane protein 2 | (RefSeq) peroxisomal membrane protein PMP22-like	ko04146:Peroxisome	[R]	General function prediction only	Mpv17 / PMP22 family	Peroxisomal membrane protein PMP22 GN=PMP22 OS=Arabidopsis thaliana (Mouse-ear cress) PE=1 SV=1	S	Function unknown	PREDICTED: peroxisomal membrane protein PMP22-like [Fragaria vesca subsp. vesca]
F01_transcript/27249	--	--	Cellular Component: plastid (GO:0009536);; Cellular Component: integral component of membrane (GO:0016021);;	--	--	--	--	--	--	S	Function unknown	PREDICTED: uncharacterized protein LOC105166810 [Sesamum indicum]
F01_transcript/26813	--	--	--	--	--	[Z]	Cytoskeleton	LisH;; CTLH/CRA C-terminal to LisH motif domain	--	S	Function unknown	BnaC01g29100D [Brassica napus]
F01_transcript/5834	--	--	Biological Process: mRNA processing (GO:0006397);;	K13171|1.93805e-96|tcc:TCM_041778|K13171 serine/arginine repetitive matrix protein 1 | (RefSeq) Splicing factor PWI domain-containing protein, putative isoform 1	ko03013:RNA transport;ko03015:mRNA surveillance pathway	[AR]	--	PWI domain	--	S	Function unknown	Splicing factor PWI domain-containing protein, putative isoform 2 [Theobroma cacao]
F01_transcript/26398	--	--	--	--	--	--	--	--	Uncharacterized protein At5g23160 GN=At5g23160 OS=Arabidopsis thaliana (Mouse-ear cress) PE=2 SV=1	S	Function unknown	Uncharacterized protein isoform 2 [Theobroma cacao]
F01_transcript/19116	--	--	Cellular Component: membrane (GO:0016020);;	--	--	--	--	--	--	S	Function unknown	PREDICTED: putative mediator of RNA polymerase II transcription subunit 29 [Nicotiana sylvestris]
F01_transcript/7818	--	--	Biological Process: maturation of SSU-rRNA from tricistronic rRNA transcript (SSU-rRNA, 5.8S rRNA, LSU-rRNA) (GO:0000462);; Cellular Component: nucleolus (GO:0005730);; Biological Process: rRNA transcription (GO:0009303);; Biological Process: embryo sac development (GO:0009553);; Biological Process: embryo development ending in seed dormancy (GO:0009793);; Molecular Function: rRNA binding (GO:001…	K14774|0|vvi:100254023|K14774 U3 small nucleolar RNA-associated protein 25 | (RefSeq) U3 small nucleolar RNA-associated protein 25	--	[S]	Function unknown	Utp25, U3 small nucleolar RNA-associated SSU processome protein 25	--	J	Translation, ribosomal structure and biogenesis	PREDICTED: U3 small nucleolar RNA-associated protein 25 [Vitis vinifera]
F01_transcript/14887	--	--	Molecular Function: GTPase activity (GO:0003924);; Molecular Function: GTP binding (GO:0005525);;	K01528|0|vvi:100266825|K01528 dynamin GTPase [EC:3.6.5.5] | (RefSeq) dynamin-related protein 1E	ko04144:Endocytosis	[UR]	--	Dynamin central region;; Dynamin family;; Dynamin GTPase effector domain;; 50S ribosome-binding GTPase	Dynamin-related protein 1E GN=T2O9.170 OS=Arabidopsis thaliana (Mouse-ear cress) PE=1 SV=1	S	Function unknown	hypothetical protein JCGZ_14684 [Jatropha curcas]
F01_transcript/32359	--	--	--	--	--	[S]	Function unknown	Costars	Costars family protein OS=Oryza sativa subsp. japonica (Rice) PE=3 SV=1	S	Function unknown	PREDICTED: costars family protein [Eucalyptus grandis]
F01_transcript/1872	--	--	Cellular Component: cell (GO:0005623);; Biological Process: cellular process (GO:0009987);;	--	--	--	--	Uncharacterized ACR, COG1678;; Thioredoxin	--	S	Function unknown	PREDICTED: uncharacterized protein LOC100854034 isoform X1 [Vitis vinifera]
F01_transcript/31495	--	--	Biological Process: cytoplasmic translation (GO:0002181);; Molecular Function: structural constituent of ribosome (GO:0003735);; Cellular Component: integral component of membrane (GO:0016021);; Cellular Component: cytosolic large ribosomal subunit (GO:0022625);;	K02920|4.29702e-67|tcc:TCM_005339|K02920 large subunit ribosomal protein L36e | (RefSeq) 60S ribosomal protein L36 isoform 1	ko03010:Ribosome	[J]	Translation, ribosomal structure and biogenesis	Ribosomal protein L36e	60S ribosomal protein L36-2 GN=RPL36B OS=Arabidopsis thaliana (Mouse-ear cress) PE=2 SV=1	J	Translation, ribosomal structure and biogenesis	PREDICTED: 60S ribosomal protein L36-2-like [Eucalyptus grandis]
F01_transcript/32598	[O]	Posttranslational modification, protein turnover, chaperones	Cellular Component: peroxisomal matrix (GO:0005782);; Biological Process: protein folding (GO:0006457);; Cellular Component: integral component of membrane (GO:0016021);;	K13993|1.63482e-34|mdm:103444228|K13993 HSP20 family protein | (RefSeq) 15.7 kDa heat shock protein, peroxisomal-like	ko04141:Protein processing in endoplasmic reticulum	[O]	Posttranslational modification, protein turnover, chaperones	Hsp20/alpha crystallin family	15.7 kDa heat shock protein, peroxisomal GN=HSP15.7 OS=Arabidopsis thaliana (Mouse-ear cress) PE=2 SV=1	O	Posttranslational modification, protein turnover, chaperones	PREDICTED: 15.7 kDa heat shock protein, peroxisomal [Sesamum indicum]
F01_transcript/21949	--	--	Cellular Component: integral component of membrane (GO:0016021);;	--	--	[R]	General function prediction only	TMPIT-like protein;; TMPIT-like protein	--	S	Function unknown	PREDICTED: transmembrane protein 120 homolog isoform X1 [Nicotiana tomentosiformis]
F01_transcript/25206	--	--	Biological Process: transcription, DNA-templated (GO:0006351);;	--	--	--	--	MYB-CC type transfactor, LHEQLE motif;; Myb-like DNA-binding domain	Protein PHR1-LIKE 1 GN=PHL1 OS=Arabidopsis thaliana (Mouse-ear cress) PE=1 SV=1	S	Function unknown	unnamed protein product [Coffea canephora]
F01_transcript/23261	[R]	General function prediction only	Molecular Function: transcription coactivator activity (GO:0003713);; Cellular Component: nucleus (GO:0005634);; Cellular Component: mitochondrion (GO:0005739);; Cellular Component: cytosol (GO:0005829);; Biological Process: regulation of transcription from RNA polymerase II promoter (GO:0006357);; Biological Process: glutamine metabolic process (GO:0006541);; Molecular Function: transferase acti…	K03152|0|tcc:TCM_031744|K03152 4-methyl-5(b-hydroxyethyl)-thiazole monophosphate biosynthesis | (RefSeq) Class I glutamine amidotransferase-like superfamily protein isoform 1	--	[RV]	--	DJ-1/PfpI family	Protein DJ-1 homolog B (Precursor) GN=DJ1B OS=Arabidopsis thaliana (Mouse-ear cress) PE=1 SV=1	S	Function unknown	hypothetical protein JCGZ_14725 [Jatropha curcas]
F01_transcript/25865	[O]	Posttranslational modification, protein turnover, chaperones	Molecular Function: glutathione transferase activity (GO:0004364);; Cellular Component: nucleus (GO:0005634);; Cellular Component: vacuolar membrane (GO:0005774);; Biological Process: glutathione metabolic process (GO:0006749);; Cellular Component: chloroplast stroma (GO:0009570);; Cellular Component: thylakoid (GO:0009579);; Cellular Component: chloroplast envelope (GO:0009941);; Cellular Compon…	K00799|2.73212e-108|pmum:103333893|K00799 glutathione S-transferase [EC:2.5.1.18] | (RefSeq) glutathione S-transferase-like	ko00480:Glutathione metabolism	[O]	Posttranslational modification, protein turnover, chaperones	Glutathione S-transferase, N-terminal domain;; Glutathione S-transferase, C-terminal domain;; Glutathione S-transferase, N-terminal domain;; Glutathione S-transferase, C-terminal domain;; Glutathione S-transferase, N-terminal domain;; Glutathione S-transferase, C-terminal domain	Glutathione S-transferase PARB GN=PARB OS=Nicotiana tabacum (Common tobacco) PE=2 SV=1	O	Posttranslational modification, protein turnover, chaperones	hypothetical protein EUGRSUZ_H01176 [Eucalyptus grandis]
F01_transcript/31409	--	--	Molecular Function: binding (GO:0005488);;	--	--	--	--	--	Transcription factor bHLH18 GN=T30L20.1 OS=Arabidopsis thaliana (Mouse-ear cress) PE=2 SV=1	K	Transcription	hypothetical protein VITISV_043197 [Vitis vinifera]
F01_transcript/31156	--	--	--	K17362|3.15052e-61|pmum:103320466|K17362 acyl-coenzyme A thioesterase 13 [EC:3.1.2.-] | (RefSeq) uncharacterized LOC103320466	--	[R]	General function prediction only	Thioesterase superfamily	--	Q	Secondary metabolites biosynthesis, transport and catabolism	hypothetical protein JCGZ_08527 [Jatropha curcas]
F01_transcript/11778	--	--	--	--	--	--	--	NPH3 family;; BTB/POZ domain	BTB/POZ domain-containing protein At5g67385 GN=At5g67385 OS=Arabidopsis thaliana (Mouse-ear cress) PE=1 SV=2	S	Function unknown	BTB/POZ domain-containing protein [Morus notabilis]
F01_transcript/22212	[H]	Coenzyme transport and metabolism	Cellular Component: cytosol (GO:0005829);; Molecular Function: tRNA threonylcarbamoyladenosine dehydratase (GO:0061503);; Biological Process: cyclic threonylcarbamoyladenosine biosynthetic process (GO:0061504);; Molecular Function: UFM1 activating enzyme activity (GO:0071566);; Biological Process: protein ufmylation (GO:0071569);;	K12164|0|vvi:100266337|K12164 ubiquitin-like modifier-activating enzyme 5 | (RefSeq) ubiquitin-like modifier-activating enzyme 5	--	[H]	Coenzyme transport and metabolism	ThiF family	Ubiquitin-like modifier-activating enzyme 5 GN=At1g05350 OS=Arabidopsis thaliana (Mouse-ear cress) PE=3 SV=2	H	Coenzyme transport and metabolism	PREDICTED: ubiquitin-like modifier-activating enzyme 5 [Vitis vinifera]
F01_transcript/13240	--	--	Molecular Function: transporter activity (GO:0005215);; Cellular Component: integral component of membrane (GO:0016021);; Biological Process: transmembrane transport (GO:0055085);;	--	--	--	--	Arylsulfotransferase (ASST);; Arylsulfotransferase (ASST)	--	S	Function unknown	hypothetical protein MYCFIDRAFT_196440 [Pseudocercospora fijiensis CIRAD86]
F01_transcript/29456	--	--	Molecular Function: electron carrier activity (GO:0009055);; Cellular Component: anchored component of plasma membrane (GO:0046658);;	--	--	--	--	Plastocyanin-like domain	Cucumber peeling cupredoxin OS=Cucumis sativus (Cucumber) PE=1 SV=3	S	Function unknown	PREDICTED: umecyanin-like [Eucalyptus grandis]
F01_transcript/5538	[K]	Transcription	--	--	--	[R]	General function prediction only	Leucine rich repeat;; Leucine Rich repeats (2 copies);; Leucine Rich Repeat;; Leucine rich repeat N-terminal domain;; Leucine Rich repeat	Receptor-like protein 12 (Precursor) GN=RLP12 OS=Arabidopsis thaliana (Mouse-ear cress) PE=2 SV=2	S	Function unknown	PREDICTED: probable LRR receptor-like serine/threonine-protein kinase At4g36180 isoform X1 [Nicotiana tomentosiformis]
F01_transcript/26835	--	--	Molecular Function: SNARE binding (GO:0000149);; Molecular Function: SNAP receptor activity (GO:0005484);; Biological Process: exocytosis (GO:0006887);; Biological Process: vesicle fusion (GO:0006906);; Cellular Component: integral component of membrane (GO:0016021);; Cellular Component: SNARE complex (GO:0031201);;	K08511|1.39728e-138|cmo:103483496|K08511 vesicle-associated membrane protein 72 | (RefSeq) putative vesicle-associated membrane protein 726	--	[U]	Intracellular trafficking, secretion, and vesicular transport	Synaptobrevin;; Regulated-SNARE-like domain	Vesicle-associated membrane protein 725 GN=VAMP725 OS=Arabidopsis thaliana (Mouse-ear cress) PE=2 SV=2	U	Intracellular trafficking, secretion, and vesicular transport	Vesicle-associated membrane protein 726 isoform 2 [Theobroma cacao]
F01_transcript/19831	--	--	Molecular Function: aspartic-type endopeptidase activity (GO:0004190);; Biological Process: proteolysis (GO:0006508);; Biological Process: lipid metabolic process (GO:0006629);; Cellular Component: integral component of membrane (GO:0016021);; Biological Process: protein catabolic process (GO:0030163);;	K08245|0|pop:POPTR_0013s00380g|K08245 phytepsin [EC:3.4.23.40] | (RefSeq) POPTRDRAFT_834438; aspartic proteinase 2	--	[O]	Posttranslational modification, protein turnover, chaperones	Eukaryotic aspartyl protease;; Xylanase inhibitor N-terminal;; Saposin-like type B, region 2;; Saposin-like type B, region 1	Aspartic proteinase oryzasin-1 (Precursor) GN=OJ1781_H11.11 OS=Oryza sativa subsp. japonica (Rice) PE=2 SV=2	O	Posttranslational modification, protein turnover, chaperones	PREDICTED: cyprosin-like [Nicotiana tomentosiformis]
F01_transcript/24982	[C]	Energy production and conversion	Cellular Component: mitochondrial proton-transporting ATP synthase complex, catalytic core F(1) (GO:0000275);; Molecular Function: ATP binding (GO:0005524);; Biological Process: ATP synthesis coupled proton transport (GO:0015986);; Biological Process: ATP hydrolysis coupled proton transport (GO:0015991);; Molecular Function: proton-transporting ATP synthase activity, rotational mechanism (GO:0046…	K02133|0|sita:101763014|K02133 F-type H+-transporting ATPase subunit beta [EC:3.6.3.14] | (RefSeq) uncharacterized LOC101763014	ko00190:Oxidative phosphorylation	[C]	Energy production and conversion	ATP synthase alpha/beta family, nucleotide-binding domain	ATP synthase subunit beta, mitochondrial (Precursor) GN=ATPB OS=Nicotiana plumbaginifolia (Leadwort-leaved tobacco) PE=1 SV=1	C	Energy production and conversion	PREDICTED: uncharacterized protein LOC101763014 [Setaria italica]
F01_transcript/21983	[O]	Posttranslational modification, protein turnover, chaperones	Molecular Function: ATP binding (GO:0005524);; Cellular Component: integral component of membrane (GO:0016021);;	K09490|0|pop:POPTR_0001s11010g|K09490 heat shock 70kDa protein 5 | (RefSeq) POPTRDRAFT_829431; BiP isoform A family protein	ko03060:Protein export;ko04141:Protein processing in endoplasmic reticulum	[O]	Posttranslational modification, protein turnover, chaperones	Hsp70 protein;; MreB/Mbl protein	Luminal-binding protein (Precursor) GN=HSC70 OS=Spinacia oleracea (Spinach) PE=2 SV=1	O	Posttranslational modification, protein turnover, chaperones	PREDICTED: luminal-binding protein [Nicotiana sylvestris]
F01_transcript/23957	[J]	Translation, ribosomal structure and biogenesis	Molecular Function: RNA binding (GO:0003723);; Cellular Component: nucleus (GO:0005634);; Cellular Component: cytoplasm (GO:0005737);; Biological Process: rRNA processing (GO:0006364);; Molecular Function: zinc ion binding (GO:0008270);; Biological Process: mature ribosome assembly (GO:0042256);;	--	--	[J]	Translation, ribosomal structure and biogenesis	SBDS protein C-terminal domain;; Shwachman-Bodian-Diamond syndrome (SBDS) protein	--	J	Translation, ribosomal structure and biogenesis	hypothetical protein JCGZ_25254 [Jatropha curcas]
F01_transcript/23953	[T]	Signal transduction mechanisms	Molecular Function: NAD+ ADP-ribosyltransferase activity (GO:0003950);;	--	--	[R]	General function prediction only	Ankyrin repeats (3 copies);; Ankyrin repeats (many copies);; Ankyrin repeats (many copies);; Ankyrin repeat;; Ankyrin repeat	Ankyrin repeat domain-containing protein 2 GN=F15J1.20 OS=Arabidopsis thaliana (Mouse-ear cress) PE=1 SV=2	S	Function unknown	hypothetical protein JCGZ_10785 [Jatropha curcas]
F01_transcript/8431	--	--	Cellular Component: late endosome (GO:0005770);; Cellular Component: cytosol (GO:0005829);; Biological Process: intracellular protein transport (GO:0006886);; Molecular Function: protein transporter activity (GO:0008565);; Cellular Component: retromer complex (GO:0030904);; Biological Process: retrograde transport, endosome to Golgi (GO:0042147);;	K18468|0|tcc:TCM_000163|K18468 vacuolar protein sorting-associated protein 35 | (RefSeq) VPS35 A isoform 1	ko04144:Endocytosis	[U]	Intracellular trafficking, secretion, and vesicular transport	Vacuolar protein sorting-associated protein 35	Vacuolar protein sorting-associated protein 35B GN=VPS35B OS=Arabidopsis thaliana (Mouse-ear cress) PE=1 SV=1	U	Intracellular trafficking, secretion, and vesicular transport	VPS35 A isoform 1 [Theobroma cacao]
F01_transcript/26145	--	--	Molecular Function: peroxidase activity (GO:0004601);; Cellular Component: extracellular region (GO:0005576);; Cellular Component: cytosol (GO:0005829);; Biological Process: response to oxidative stress (GO:0006979);; Cellular Component: plant-type cell wall (GO:0009505);; Biological Process: plant-type cell wall organization (GO:0009664);; Molecular Function: heme binding (GO:0020037);; Biologic…	K00430|0|tcc:TCM_022117|K00430 peroxidase [EC:1.11.1.7] | (RefSeq) Peroxidase superfamily protein	ko00940:Phenylpropanoid biosynthesis	--	--	Peroxidase	Peroxidase 21 (Precursor) GN=T2N18.11 OS=Arabidopsis thaliana (Mouse-ear cress) PE=1 SV=1	G	Carbohydrate transport and metabolism	Peroxidase superfamily protein [Theobroma cacao]
F01_transcript/23736	[R]	General function prediction only	Biological Process: defense response (GO:0006952);;	K12795|0|sot:102599444|K12795 suppressor of G2 allele of SKP1 | (RefSeq) SGT1; protein SGT1 homolog	ko04626:Plant-pathogen interaction	[T]	Signal transduction mechanisms	SGS domain;; CS domain;; Tetratricopeptide repeat;; Tetratricopeptide repeat;; Tetratricopeptide repeat;; Tetratricopeptide repeat;; TPR repeat;; Tetratricopeptide repeat;; Tetratricopeptide repeat	Protein SGT1 homolog GN=OsJ_02663 OS=Oryza sativa subsp. japonica (Rice) PE=1 SV=1	S	Function unknown	PREDICTED: protein SGT1 homolog [Nicotiana sylvestris]
F01_transcript/24054	--	--	--	--	--	--	--	--	--	S	Function unknown	PREDICTED: uncharacterized protein LOC105174057 [Sesamum indicum]
F01_transcript/21164	--	--	Molecular Function: transcription factor activity, sequence-specific DNA binding (GO:0003700);; Cellular Component: nucleus (GO:0005634);; Biological Process: regulation of transcription, DNA-templated (GO:0006355);; Molecular Function: sequence-specific DNA binding (GO:0043565);;	--	--	--	--	bZIP transcription factor;; Basic region leucine zipper	Probable transcription factor PosF21 GN=T28P16.14 OS=Arabidopsis thaliana (Mouse-ear cress) PE=2 SV=1	K	Transcription	bZIP transcription factor family protein 11 [Camellia sinensis]
F01_transcript/26794	--	--	--	--	--	--	--	PAP_fibrillin	Probable plastid-lipid-associated protein 13, chloroplastic (Precursor) GN=T24P15.4 OS=Arabidopsis thaliana (Mouse-ear cress) PE=2 SV=2	S	Function unknown	plastid lipid-associated protein [Vitis pseudoreticulata]
F01_transcript/22842	[E]	Amino acid transport and metabolism	Biological Process: histidine biosynthetic process (GO:0000105);; Molecular Function: histidinol-phosphate transaminase activity (GO:0004400);; Cellular Component: chloroplast (GO:0009507);; Molecular Function: pyridoxal phosphate binding (GO:0030170);; Molecular Function: L-phenylalanine:2-oxoglutarate aminotransferase activity (GO:0080130);;	K00817|0|pxb:103963645|K00817 histidinol-phosphate aminotransferase [EC:2.6.1.9] | (RefSeq) histidinol-phosphate aminotransferase, chloroplastic-like	ko00340:Histidine metabolism;ko00350:Tyrosine metabolism;ko00360:Phenylalanine metabolism;ko00400:Phenylalanine, tyrosine and tryptophan biosynthesis;ko00960:Tropane, piperidine and pyridine alkaloid biosynthesis;ko01230:Biosynthesis of amino acids	[E]	Amino acid transport and metabolism	Aminotransferase class I and II;; Allinase	Histidinol-phosphate aminotransferase, chloroplastic (Precursor) GN=HPA OS=Nicotiana plumbaginifolia (Leadwort-leaved tobacco) PE=1 SV=1	E	Amino acid transport and metabolism	PREDICTED: histidinol-phosphate aminotransferase, chloroplastic-like [Pyrus x bretschneideri]
F01_transcript/29676	--	--	Cellular Component: anchored component of plasma membrane (GO:0046658);;	--	--	--	--	Plastocyanin-like domain	--	S	Function unknown	PREDICTED: cucumber peeling cupredoxin-like [Nicotiana tomentosiformis]
F01_transcript/9939	--	--	Molecular Function: metal ion binding (GO:0046872);;	--	--	[R]	General function prediction only	Ankyrin repeat;; Ankyrin repeats (3 copies);; Ankyrin repeat;; Ankyrin repeats (many copies);; Ankyrin repeats (many copies)	Zinc finger CCCH domain-containing protein 30 GN=At2g41900 OS=Arabidopsis thaliana (Mouse-ear cress) PE=1 SV=2	S	Function unknown	PREDICTED: zinc finger CCCH domain-containing protein 30-like [Nicotiana tomentosiformis]
F01_transcript/24686	[R]	General function prediction only	Biological Process: protein depalmitoylation (GO:0002084);; Molecular Function: lysophospholipase activity (GO:0004622);; Cellular Component: cytoplasm (GO:0005737);; Molecular Function: palmitoyl-(protein) hydrolase activity (GO:0008474);;	--	--	[I]	Lipid transport and metabolism	Phospholipase/Carboxylesterase;; Serine aminopeptidase, S33;; Serine hydrolase (FSH1)	--	S	Function unknown	Acyl-protein thioesterase, putative [Ricinus communis]
F01_transcript/12992	--	--	Molecular Function: binding (GO:0005488);;	--	--	--	--	Transcriptional Coactivator p15 (PC4);; gag-polypeptide of LTR copia-type;; DEK C terminal domain;; Zinc knuckle	RNA polymerase II transcriptional coactivator KELP GN=KELP OS=Arabidopsis thaliana (Mouse-ear cress) PE=1 SV=1	K	Transcription	PREDICTED: LOW QUALITY PROTEIN: uncharacterized protein LOC105173753 [Sesamum indicum]
F01_transcript/15088	--	--	Molecular Function: aspartic-type endopeptidase activity (GO:0004190);; Biological Process: proteolysis (GO:0006508);; Cellular Component: integral component of membrane (GO:0016021);; Biological Process: protein catabolic process (GO:0030163);;	--	--	[O]	Posttranslational modification, protein turnover, chaperones	Xylanase inhibitor N-terminal;; Eukaryotic aspartyl protease;; Xylanase inhibitor C-terminal	Aspartic proteinase-like protein 2 (Precursor) GN=At1g65240 OS=Arabidopsis thaliana (Mouse-ear cress) PE=1 SV=2	O	Posttranslational modification, protein turnover, chaperones	PREDICTED: aspartic proteinase-like protein 2 isoform X1 [Vitis vinifera]
F01_transcript/25251	[G]	Carbohydrate transport and metabolism	Cellular Component: vacuole (GO:0005773);; Cellular Component: integral component of plasma membrane (GO:0005887);; Biological Process: water transport (GO:0006833);; Cellular Component: plasmodesma (GO:0009506);; Biological Process: cellular water homeostasis (GO:0009992);; Molecular Function: water channel activity (GO:0015250);; Molecular Function: glycerol channel activity (GO:0015254);; Biol…	K09872|2.84141e-177|pop:POPTR_0008s03950g|K09872 aquaporin PIP | (RefSeq) POPTRDRAFT_563742; plasma membrane intrinsic protein 1-1	--	[G]	Carbohydrate transport and metabolism	Major intrinsic protein	Aquaporin PIP2-1, N-terminally processed GN=F4P12.120 OS=Arabidopsis thaliana (Mouse-ear cress) PE=1 SV=1	G	Carbohydrate transport and metabolism	aquaporin protein AQU15 [Camellia sinensis]
F01_transcript/29275	[P]	Inorganic ion transport and metabolism	Cellular Component: cytosol (GO:0005829);; Molecular Function: cyanate hydratase activity (GO:0008824);; Biological Process: cyanate catabolic process (GO:0009440);; Molecular Function: identical protein binding (GO:0042802);; Molecular Function: sequence-specific DNA binding (GO:0043565);;	K01725|1.28298e-80|cit:102613904|K01725 cyanate lyase [EC:4.2.1.104] | (RefSeq) cyanate hydratase-like	ko00910:Nitrogen metabolism	--	--	Cyanate lyase C-terminal domain	Cyanate hydratase 2 {ECO:0000255|HAMAP-Rule:MF_03139} GN=POPTRDRAFT_833411 OS=Populus trichocarpa (Western balsam poplar) PE=3 SV=1	P	Inorganic ion transport and metabolism	PREDICTED: cyanate hydratase 2 [Eucalyptus grandis]
F01_transcript/24001	[T]	Signal transduction mechanisms	Molecular Function: phosphoprotein phosphatase activity (GO:0004721);; Biological Process: protein dephosphorylation (GO:0006470);;	K15423|0|pper:PRUPE_ppa009146mg|K15423 serine/threonine-protein phosphatase 4 catalytic subunit [EC:3.1.3.16] | (RefSeq) hypothetical protein	--	[GT]	--	Calcineurin-like phosphoesterase	Serine/threonine-protein phosphatase PP-X isozyme 2 GN=PPX2 OS=Arabidopsis thaliana (Mouse-ear cress) PE=2 SV=2	T	Signal transduction mechanisms	hypothetical protein PRUPE_ppa009146mg [Prunus persica]
F01_transcript/29925	--	--	Biological Process: response to light stimulus (GO:0009416);; Cellular Component: photosystem I (GO:0009522);; Cellular Component: chloroplast thylakoid membrane (GO:0009535);; Biological Process: photosynthesis, light harvesting in photosystem I (GO:0009768);; Cellular Component: chloroplast envelope (GO:0009941);; Cellular Component: plastoglobule (GO:0010287);; Cellular Component: integral com…	--	--	--	--	Chlorophyll A-B binding protein	Chlorophyll a-b binding protein CP29.2, chloroplastic (Precursor) GN=LHCB4.2 OS=Arabidopsis thaliana (Mouse-ear cress) PE=1 SV=1	I	Lipid transport and metabolism	chloroplast chlorophyll A/B binding protein [Dimocarpus longan]
F01_transcript/28011	[G]	Carbohydrate transport and metabolism	Biological Process: glucose metabolic process (GO:0006006);; Molecular Function: oxidoreductase activity, acting on the aldehyde or oxo group of donors, NAD or NADP as acceptor (GO:0016620);; Molecular Function: NADP binding (GO:0050661);; Molecular Function: NAD binding (GO:0051287);; Biological Process: oxidation-reduction process (GO:0055114);;	K00134|2.05513e-95|fve:101296832|K00134 glyceraldehyde 3-phosphate dehydrogenase [EC:1.2.1.12] | (RefSeq) glyceraldehyde-3-phosphate dehydrogenase GAPC2, cytosolic	ko00010:Glycolysis / Gluconeogenesis;ko00710:Carbon fixation in photosynthetic organisms;ko01200:Carbon metabolism;ko01230:Biosynthesis of amino acids	[G]	Carbohydrate transport and metabolism	Glyceraldehyde 3-phosphate dehydrogenase, C-terminal domain	Glyceraldehyde-3-phosphate dehydrogenase, cytosolic OS=Ginkgo biloba (Ginkgo) PE=2 SV=1	G	Carbohydrate transport and metabolism	glyceraldehyde-3-phosphate dehydrogenase [Cladopus doianus]
F01_transcript/22857	[Q]	Secondary metabolites biosynthesis, transport and catabolism	Molecular Function: homogentisate 1,2-dioxygenase activity (GO:0004411);; Cellular Component: cytosol (GO:0005829);; Biological Process: L-phenylalanine catabolic process (GO:0006559);; Biological Process: tyrosine catabolic process (GO:0006572);; Biological Process: oxidation-reduction process (GO:0055114);; Biological Process: homogentisate catabolic process (GO:1902000);;	K00451|0|sot:102579798|K00451 homogentisate 1,2-dioxygenase [EC:1.13.11.5] | (RefSeq) homogentisate 1,2-dioxygenase	ko00350:Tyrosine metabolism	[E]	Amino acid transport and metabolism	homogentisate 1,2-dioxygenase	Homogentisate 1,2-dioxygenase GN=HGO OS=Arabidopsis thaliana (Mouse-ear cress) PE=2 SV=2	Q	Secondary metabolites biosynthesis, transport and catabolism	PREDICTED: LOW QUALITY PROTEIN: homogentisate 1,2-dioxygenase-like [Solanum tuberosum]
F01_transcript/15908	--	--	--	--	--	--	--	--	--	S	Function unknown	PREDICTED: dentin sialophosphoprotein [Prunus mume]
F01_transcript/21408	--	--	Cellular Component: ubiquitin ligase complex (GO:0000151);; Molecular Function: ubiquitin conjugating enzyme binding (GO:0031624);; Molecular Function: ubiquitin-like protein binding (GO:0032182);; Biological Process: protein neddylation (GO:0045116);; Biological Process: positive regulation of ubiquitin-protein transferase activity (GO:0051443);; Molecular Function: cullin family protein binding…	--	--	[S]	Function unknown	Cullin binding	--	S	Function unknown	hypothetical protein JCGZ_19856 [Jatropha curcas]
F01_transcript/29610	--	--	Molecular Function: nucleotide binding (GO:0000166);; Cellular Component: endomembrane system (GO:0012505);; Biological Process: protein transport (GO:0015031);; Cellular Component: intracellular membrane-bounded organelle (GO:0043231);; Cellular Component: cytoplasmic part (GO:0044444);;	K07953|2.62936e-30|pvu:PHAVU_003G112100g|K07953 GTP-binding protein SAR1 [EC:3.6.5.-] | (RefSeq) hypothetical protein	ko04141:Protein processing in endoplasmic reticulum	[U]	Intracellular trafficking, secretion, and vesicular transport	ADP-ribosylation factor family;; ADP-ribosylation factor family	GTP-binding protein SAR1A GN=SAR1A OS=Arabidopsis thaliana (Mouse-ear cress) PE=2 SV=1	U	Intracellular trafficking, secretion, and vesicular transport	PREDICTED: GTP-binding protein SAR1B-like, partial [Tarenaya hassleriana]
F01_transcript/21877	[G]	Carbohydrate transport and metabolism	Cellular Component: integral component of membrane (GO:0016021);;	--	--	--	--	Protein of unknown function (DUF707)	--	S	Function unknown	PREDICTED: uncharacterized protein LOC104221038 [Nicotiana sylvestris]
F01_transcript/19130	[T]	Signal transduction mechanisms	Biological Process: developmental process involved in reproduction (GO:0003006);; Molecular Function: protein serine/threonine kinase activity (GO:0004674);; Molecular Function: ATP binding (GO:0005524);; Cellular Component: nucleus (GO:0005634);; Cellular Component: cytoplasm (GO:0005737);; Biological Process: protein phosphorylation (GO:0006468);; Biological Process: detection of nutrient (GO:0…	K07198|0|csv:101211720|K07198 5'-AMP-activated protein kinase, catalytic alpha subunit [EC:2.7.11.11] | (RefSeq) SNF1-related protein kinase catalytic subunit alpha KIN10	ko04140:Regulation of autophagy	[T]	Signal transduction mechanisms	Protein kinase domain;; Protein tyrosine kinase;; Kinase associated domain 1;; Kinase-like	SNF1-related protein kinase catalytic subunit alpha KIN10 GN=At3g01090 OS=Arabidopsis thaliana (Mouse-ear cress) PE=1 SV=2	T	Signal transduction mechanisms	sucrose non-fermenting 1 [Camellia sinensis]
F01_transcript/11495	[C]	Energy production and conversion	Molecular Function: inorganic diphosphatase activity (GO:0004427);; Molecular Function: hydrogen-translocating pyrophosphatase activity (GO:0009678);; Biological Process: proton transport (GO:0015992);; Cellular Component: integral component of membrane (GO:0016021);; Biological Process: transmembrane transport (GO:0055085);;	K01507|0|gmx:100794166|K01507 inorganic pyrophosphatase [EC:3.6.1.1] | (RefSeq) pyrophosphate-energized vacuolar membrane proton pump	--	--	--	Inorganic H+ pyrophosphatase;; Inorganic H+ pyrophosphatase	Pyrophosphate-energized vacuolar membrane proton pump OS=Vigna radiata var. radiata (Mung bean) PE=1 SV=4	C	Energy production and conversion	PREDICTED: pyrophosphate-energized vacuolar membrane proton pump-like [Glycine max]
F01_transcript/16601	--	--	Cellular Component: Golgi apparatus (GO:0005794);; Molecular Function: galactoside 2-alpha-L-fucosyltransferase activity (GO:0008107);; Biological Process: plant-type cell wall biogenesis (GO:0009832);; Biological Process: xyloglucan biosynthetic process (GO:0009969);; Cellular Component: integral component of membrane (GO:0016021);; Biological Process: fucosylation (GO:0036065);;	K13681|0|pmum:103338482|K13681 xyloglucan fucosyltransferase [EC:2.4.1.-] | (RefSeq) galactoside 2-alpha-L-fucosyltransferase	--	--	--	Xyloglucan fucosyltransferase	Galactoside 2-alpha-L-fucosyltransferase GN=FT1 OS=Pisum sativum (Garden pea) PE=2 SV=1	O	Posttranslational modification, protein turnover, chaperones	PREDICTED: galactoside 2-alpha-L-fucosyltransferase-like isoform X2 [Nelumbo nucifera]
F01_transcript/33526	--	--	Cellular Component: membrane (GO:0016020);;	--	--	--	--	--	--	S	Function unknown	PREDICTED: uncharacterized protein LOC101260954 [Solanum lycopersicum]
F01_transcript/816	--	--	Biological Process: cellular process (GO:0009987);;	--	--	[BDT]	--	DIRP;; Myb-like DNA-binding domain	Protein ALWAYS EARLY 3 GN=MHC9 OS=Arabidopsis thaliana (Mouse-ear cress) PE=1 SV=1	S	Function unknown	PREDICTED: protein ALWAYS EARLY 3 [Vitis vinifera]
F01_transcript/829	--	--	--	--	--	--	--	Ring finger domain;; PHD-finger;; Zinc finger, C3HC4 type (RING finger)	Uncharacterized protein At4g10930 GN=At4g10930 OS=Arabidopsis thaliana (Mouse-ear cress) PE=2 SV=1	S	Function unknown	PREDICTED: uncharacterized protein At4g10930-like isoform X1 [Vitis vinifera]
F01_transcript/25568	[O]	Posttranslational modification, protein turnover, chaperones	Molecular Function: ATP binding (GO:0005524);; Molecular Function: 2-alkenal reductase [NAD(P)] activity (GO:0032440);; Biological Process: oxidation-reduction process (GO:0055114);;	K03283|0|tcc:TCM_021961|K03283 heat shock 70kDa protein 1/8 | (RefSeq) Heat shock cognate protein 70-1 isoform 1	ko03040:Spliceosome;ko04141:Protein processing in endoplasmic reticulum;ko04144:Endocytosis	[O]	Posttranslational modification, protein turnover, chaperones	Hsp70 protein	Probable mediator of RNA polymerase II transcription subunit 37e GN=At5g02500 OS=Arabidopsis thaliana (Mouse-ear cress) PE=1 SV=3	O	Posttranslational modification, protein turnover, chaperones	Heat shock cognate protein 70-1 isoform 1 [Theobroma cacao]
F01_transcript/17347	--	--	Molecular Function: DNA-directed 5'-3' RNA polymerase activity (GO:0003899);; Cellular Component: mitochondrion (GO:0005739);; Cellular Component: vacuolar membrane (GO:0005774);; Cellular Component: endoplasmic reticulum membrane (GO:0005789);; Cellular Component: Golgi apparatus (GO:0005794);; Cellular Component: plasma membrane (GO:0005886);; Biological Process: transcription, DNA-templated (G…	--	--	[E]	Amino acid transport and metabolism	Nicastrin;; Peptidase family M28	--	S	Function unknown	PREDICTED: nicalin-1 [Vitis vinifera]
F01_transcript/18233	[C]	Energy production and conversion	Molecular Function: dihydrolipoyllysine-residue acetyltransferase activity (GO:0004742);; Cellular Component: mitochondrion (GO:0005739);; Biological Process: acetyl-CoA biosynthetic process from pyruvate (GO:0006086);; Biological Process: glycolytic process (GO:0006096);; Cellular Component: chloroplast thylakoid (GO:0009534);; Cellular Component: chloroplast stroma (GO:0009570);; Cellular Compo…	K00627|0|csv:101220730|K00627 pyruvate dehydrogenase E2 component (dihydrolipoamide acetyltransferase) [EC:2.3.1.12] | (RefSeq) dihydrolipoyllysine-residue acetyltransferase component 4 of pyruvate dehydrogenase complex, chloroplastic	ko00010:Glycolysis / Gluconeogenesis;ko00020:Citrate cycle (TCA cycle);ko00620:Pyruvate metabolism;ko01200:Carbon metabolism	[C]	Energy production and conversion	2-oxoacid dehydrogenases acyltransferase (catalytic domain);; Biotin-requiring enzyme;; e3 binding domain	Dihydrolipoyllysine-residue acetyltransferase component 4 of pyruvate dehydrogenase complex, chloroplastic (Precursor) GN=LTA2 OS=Arabidopsis thaliana (Mouse-ear cress) PE=2 SV=1	C	Energy production and conversion	PREDICTED: dihydrolipoyllysine-residue acetyltransferase component 3 of pyruvate dehydrogenase complex, mitochondrial [Cucumis melo]
F01_transcript/28096	--	--	Biological Process: response to light stimulus (GO:0009416);; Cellular Component: photosystem I (GO:0009522);; Cellular Component: photosystem II (GO:0009523);; Cellular Component: chloroplast thylakoid membrane (GO:0009535);; Biological Process: photosynthesis, light harvesting in photosystem I (GO:0009768);; Cellular Component: chloroplast envelope (GO:0009941);; Cellular Component: plastoglobu…	K08912|3.32955e-169|tcc:TCM_029532|K08912 light-harvesting complex II chlorophyll a/b binding protein 1 | (RefSeq) Chlorophyll a-b binding protein, chloroplastic	ko00196:Photosynthesis - antenna proteins	--	--	Chlorophyll A-B binding protein	Chlorophyll a-b binding protein 40, chloroplastic (Precursor) GN=CAB40 OS=Nicotiana tabacum (Common tobacco) PE=2 SV=1	J	Translation, ribosomal structure and biogenesis	chloroplast chlorophyll A-B binding protein [Gossypium hirsutum]
F01_transcript/10098	--	--	Cellular Component: nucleus (GO:0005634);; Cellular Component: cytoplasm (GO:0005737);;	--	--	[S]	Function unknown	C2 domain;; Armadillo/beta-catenin-like repeat	--	S	Function unknown	PREDICTED: uncharacterized protein LOC100260874 [Vitis vinifera]
F01_transcript/17783	[E]	Amino acid transport and metabolism	Molecular Function: transporter activity (GO:0005215);; Biological Process: transport (GO:0006810);; Cellular Component: integral component of membrane (GO:0016021);;	K14638|0|vvi:100258695|K14638 solute carrier family 15 (peptide/histidine transporter), member 3/4 | (RefSeq) protein NRT1/ PTR FAMILY 2.11	--	[E]	Amino acid transport and metabolism	POT family	Protein NRT1/ PTR FAMILY 2.11 GN=MRG21.10 OS=Arabidopsis thaliana (Mouse-ear cress) PE=1 SV=1	E	Amino acid transport and metabolism	PREDICTED: protein NRT1/ PTR FAMILY 2.11-like [Nicotiana sylvestris]
F01_transcript/10602	[O]	Posttranslational modification, protein turnover, chaperones	Molecular Function: ATP binding (GO:0005524);; Cellular Component: endoplasmic reticulum (GO:0005783);; Cellular Component: integral component of membrane (GO:0016021);; Molecular Function: 2-alkenal reductase [NAD(P)] activity (GO:0032440);; Biological Process: oxidation-reduction process (GO:0055114);;	K09490|0|tcc:TCM_016516|K09490 heat shock 70kDa protein 5 | (RefSeq) Heat shock protein 70 (Hsp 70) family protein	ko03060:Protein export;ko04141:Protein processing in endoplasmic reticulum	[O]	Posttranslational modification, protein turnover, chaperones	Hsp70 protein;; MreB/Mbl protein	Luminal-binding protein 5 (Precursor) GN=BIP5 OS=Nicotiana tabacum (Common tobacco) PE=2 SV=1	O	Posttranslational modification, protein turnover, chaperones	Heat shock protein 70 (Hsp 70) family protein [Theobroma cacao]
F01_transcript/4747	--	--	Molecular Function: GTPase activator activity (GO:0005096);; Cellular Component: cytoplasm (GO:0005737);; Biological Process: signal transduction (GO:0007165);; Biological Process: positive regulation of GTPase activity (GO:0043547);;	--	--	[T]	Signal transduction mechanisms	RhoGAP domain;; Leucine-zipper of ternary complex factor MIP1;; PH domain	Rho GTPase-activating protein 7 GN=ROPGAP7 OS=Arabidopsis thaliana (Mouse-ear cress) PE=2 SV=1	S	Function unknown	Rho GTPase activation protein with PH domain isoform 1 [Theobroma cacao]
F01_transcript/33389	[T]	Signal transduction mechanisms	Biological Process: response to stress (GO:0006950);;	--	--	--	--	Universal stress protein family	Universal stress protein A-like protein GN=At3g01520 OS=Arabidopsis thaliana (Mouse-ear cress) PE=1 SV=2	T	Signal transduction mechanisms	hypothetical protein CICLE_v10012833mg [Citrus clementina]
F01_transcript/194	[V]	Defense mechanisms	Molecular Function: ATP binding (GO:0005524);; Cellular Component: integral component of membrane (GO:0016021);; Molecular Function: ATPase activity, coupled to transmembrane movement of substances (GO:0042626);; Biological Process: transmembrane transport (GO:0055085);;	K05665|0|tcc:TCM_042344|K05665 ATP-binding cassette, subfamily C (CFTR/MRP), member 1 | (RefSeq) Multidrug resistance protein ABC transporter family	--	[Q]	Secondary metabolites biosynthesis, transport and catabolism	ABC transporter transmembrane region;; ABC transporter;; P-loop containing region of AAA domain;; 50S ribosome-binding GTPase;; Domain of unknown function DUF87	ABC transporter C family member 9 GN=T2O9.140 OS=Arabidopsis thaliana (Mouse-ear cress) PE=2 SV=2	V	Defense mechanisms	PREDICTED: putative ABC transporter C family member 15 [Sesamum indicum]
F01_transcript/59	--	--	Cellular Component: histone acetyltransferase complex (GO:0000123);; Biological Process: DNA repair (GO:0006281);; Cellular Component: integral component of membrane (GO:0016021);; Molecular Function: kinase activity (GO:0016301);; Biological Process: phosphorylation (GO:0016310);; Biological Process: histone acetylation (GO:0016573);;	K08874|0|vvi:100255847|K08874 transformation/transcription domain-associated protein | (RefSeq) TRRAP; transcription-associated protein 1	--	[TBLD]	--	FAT domain;; Phosphatidylinositol 3- and 4-kinase;; FATC domain	Serine/threonine-protein kinase ATM GN=ATM OS=Arabidopsis thaliana (Mouse-ear cress) PE=2 SV=1	BDLTU	--	PREDICTED: transcription-associated protein 1 [Vitis vinifera]
F01_transcript/14309	[T]	Signal transduction mechanisms	Molecular Function: protein serine/threonine kinase activity (GO:0004674);; Molecular Function: ATP binding (GO:0005524);; Cellular Component: intracellular (GO:0005622);; Biological Process: peptidyl-serine phosphorylation (GO:0018105);; Biological Process: intracellular signal transduction (GO:0035556);;	K08790|0|vvi:100252887|K08790 serine/threonine kinase 38 [EC:2.7.11.1] | (RefSeq) serine/threonine-protein kinase tricorner	--	[R]	General function prediction only	Protein kinase domain;; Protein tyrosine kinase;; Protein kinase C terminal domain	Probable serine/threonine protein kinase IRE {ECO:0000305} OS=Arabidopsis thaliana (Mouse-ear cress) PE=2 SV=1	T	Signal transduction mechanisms	PREDICTED: serine/threonine-protein kinase tricorner [Vitis vinifera]
F01_transcript/231	--	--	Biological Process: response to stimulus (GO:0050896);;	--	--	--	--	--	Protein TIME FOR COFFEE GN=TIC OS=Arabidopsis thaliana (Mouse-ear cress) PE=1 SV=2	S	Function unknown	PREDICTED: protein TIME FOR COFFEE isoform X4 [Vitis vinifera]
F01_transcript/14204	--	--	Cellular Component: integral component of membrane (GO:0016021);; Biological Process: transmembrane transport (GO:0055085);;	K13754|0|vvi:100249061|K13754 solute carrier family 24 (sodium/potassium/calcium exchanger), member 6 | (RefSeq) cation/calcium exchanger 4	--	[P]	Inorganic ion transport and metabolism	Sodium/calcium exchanger protein;; Sodium/calcium exchanger protein	Cation/calcium exchanger 4 GN=F15I1.21 OS=Arabidopsis thaliana (Mouse-ear cress) PE=2 SV=1	P	Inorganic ion transport and metabolism	PREDICTED: cation/calcium exchanger 4-like [Eucalyptus grandis]
F01_transcript/3505	--	--	Molecular Function: binding (GO:0005488);; Biological Process: transcription, DNA-templated (GO:0006351);; Cellular Component: membrane (GO:0016020);;	--	--	--	--	B3 DNA binding domain;; CW-type Zinc Finger	B3 domain-containing protein Os07g0563300 GN=OJ1720_F04.105 OS=Oryza sativa subsp. japonica (Rice) PE=3 SV=2	K	Transcription	hypothetical protein CICLE_v10014219mg [Citrus clementina]
F01_transcript/28816	[O]	Posttranslational modification, protein turnover, chaperones	Cellular Component: chloroplast (GO:0009507);;	K13993|5.32708e-106|tcc:TCM_015499|K13993 HSP20 family protein | (RefSeq) Small heat shock protein isoform 1	ko04141:Protein processing in endoplasmic reticulum	[O]	Posttranslational modification, protein turnover, chaperones	Hsp20/alpha crystallin family	Small heat shock protein, chloroplastic (Precursor) GN=HSP22 OS=Petunia hybrida (Petunia) PE=2 SV=1	O	Posttranslational modification, protein turnover, chaperones	Small heat shock protein isoform 2 [Theobroma cacao]
F01_transcript/17970	--	--	Biological Process: formation of translation preinitiation complex (GO:0001731);; Molecular Function: translation initiation factor activity (GO:0003743);; Cellular Component: eukaryotic translation initiation factor 3 complex (GO:0005852);; Biological Process: regulation of translational initiation (GO:0006446);; Cellular Component: eukaryotic 43S preinitiation complex (GO:0016282);; Cellular Co…	K03251|0|vvi:100260733|K03251 translation initiation factor 3 subunit D | (RefSeq) eukaryotic translation initiation factor 3 subunit D-like	ko03013:RNA transport	[J]	Translation, ribosomal structure and biogenesis	Eukaryotic translation initiation factor 3 subunit 7 (eIF-3)	Eukaryotic translation initiation factor 3 subunit D {ECO:0000255|HAMAP-Rule:MF_03003} GN=TIF3D1 OS=Arabidopsis thaliana (Mouse-ear cress) PE=1 SV=1	J	Translation, ribosomal structure and biogenesis	PREDICTED: eukaryotic translation initiation factor 3 subunit D-like [Vitis vinifera]
F01_transcript/21612	[J]	Translation, ribosomal structure and biogenesis	Molecular Function: organic cyclic compound binding (GO:0097159);; Molecular Function: heterocyclic compound binding (GO:1901363);;	--	--	[A]	RNA processing and modification	RNA recognition motif. (a.k.a. RRM, RBD, or RNP domain);; WW domain	Flowering time control protein FCA OS=Arabidopsis thaliana (Mouse-ear cress) PE=1 SV=2	S	Function unknown	PREDICTED: flowering time control protein FCA [Sesamum indicum]
F01_transcript/1448	--	--	Biological Process: mRNA splicing, via spliceosome (GO:0000398);; Molecular Function: RNA binding (GO:0003723);; Cellular Component: nucleus (GO:0005634);;	K12830|0|vvi:100255210|K12830 splicing factor 3B subunit 3 | (RefSeq) splicing factor 3B subunit 3	ko03040:Spliceosome	[L]	Replication, recombination and repair	Mono-functional DNA-alkylating methyl methanesulfonate N-term;; CPSF A subunit region	DNA damage-binding protein 1 GN=DDB1 OS=Solanum lycopersicum (Tomato) PE=1 SV=1	A	RNA processing and modification	spliceosomal-like protein [Camellia sinensis]
F01_transcript/24844	--	--	Biological Process: regulation of biological process (GO:0050789);; Biological Process: response to stimulus (GO:0050896);;	--	--	--	--	Divergent CCT motif;; tify domain	Protein TIFY 9 GN=T31B5.40 OS=Arabidopsis thaliana (Mouse-ear cress) PE=1 SV=1	S	Function unknown	conserved hypothetical protein [Ricinus communis]
F01_transcript/9514	--	--	Molecular Function: transcription factor activity, sequence-specific DNA binding (GO:0003700);; Cellular Component: nucleus (GO:0005634);; Biological Process: regulation of transcription, DNA-templated (GO:0006355);; Biological Process: response to abscisic acid (GO:0009737);; Molecular Function: 2-alkenal reductase [NAD(P)] activity (GO:0032440);; Molecular Function: protein dimerization activit…	--	--	--	--	bHLH-MYC and R2R3-MYB transcription factors N-terminal;; Helix-loop-helix DNA-binding domain	Transcription factor bHLH13 GN=F6F3.7 OS=Arabidopsis thaliana (Mouse-ear cress) PE=2 SV=1	K	Transcription	Myc2 bHLH protein [Vitis vinifera]
F01_transcript/5121	--	--	Molecular Function: ATP binding (GO:0005524);; Cellular Component: kinesin complex (GO:0005871);; Cellular Component: microtubule (GO:0005874);; Biological Process: microtubule-based movement (GO:0007018);; Molecular Function: microtubule binding (GO:0008017);; Biological Process: protein localization (GO:0008104);; Molecular Function: ATP-dependent microtubule motor activity, plus-end-directed (…	--	--	[Z]	Cytoskeleton	Kinesin motor domain;; Microtubule binding;; Armadillo/beta-catenin-like repeat;; Armadillo-like	Armadillo repeat-containing kinesin-like protein 3 GN=F5O11.15 OS=Arabidopsis thaliana (Mouse-ear cress) PE=1 SV=1	Z	Cytoskeleton	PREDICTED: armadillo repeat-containing kinesin-like protein 3 [Vitis vinifera]
F01_transcript/32551	--	--	Biological Process: embryo development (GO:0009790);;	--	--	--	--	Late embryogenesis abundant (LEA) group 1	18 kDa seed maturation protein GN=GMPM1 OS=Glycine max (Soybean) PE=2 SV=1	S	Function unknown	hypothetical protein PHAVU_001G143100g [Phaseolus vulgaris]
F01_transcript/11712	[E]	Amino acid transport and metabolism	Molecular Function: obsolete gamma-glutamyltransferase activity (GO:0003840);; Cellular Component: vacuole (GO:0005773);; Biological Process: glutathione catabolic process (GO:0006751);; Cellular Component: integral component of membrane (GO:0016021);; Molecular Function: glutathione gamma-glutamylcysteinyltransferase activity (GO:0016756);;	K18592|0|cit:102608321|K18592 gamma-glutamyltranspeptidase / glutathione hydrolase / leukotriene-C4 hydrolase [EC:2.3.2.2 3.4.19.13 3.4.19.14] | (RefSeq) gamma-glutamyltranspeptidase 3	ko00430:Taurine and hypotaurine metabolism;ko00460:Cyanoamino acid metabolism;ko00480:Glutathione metabolism;ko00590:Arachidonic acid metabolism	[E]	Amino acid transport and metabolism	Gamma-glutamyltranspeptidase	Gamma-glutamyltranspeptidase 3 GN=F17A13.30 OS=Arabidopsis thaliana (Mouse-ear cress) PE=2 SV=1	E	Amino acid transport and metabolism	unnamed protein product [Coffea canephora]
F01_transcript/20566	[P]	Inorganic ion transport and metabolism	Molecular Function: calcium:proton antiporter activity (GO:0015369);; Cellular Component: integral component of membrane (GO:0016021);; Biological Process: calcium ion transmembrane transport (GO:0070588);;	K07300|6.90195e-180|cit:102619548|K07300 Ca2+:H+ antiporter | (RefSeq) vacuolar cation/proton exchanger 3-like	--	[P]	Inorganic ion transport and metabolism	Sodium/calcium exchanger protein	Vacuolar cation/proton exchanger 3 GN=CAX3 OS=Arabidopsis thaliana (Mouse-ear cress) PE=1 SV=1	P	Inorganic ion transport and metabolism	hypothetical protein POPTR_0001s25830g [Populus trichocarpa]
F01_transcript/1477	--	--	Molecular Function: protein serine/threonine kinase activity (GO:0004674);; Cellular Component: cytosol (GO:0005829);; Biological Process: regulation of transcription, DNA-templated (GO:0006355);; Biological Process: protein phosphorylation (GO:0006468);; Biological Process: intracellular signal transduction (GO:0035556);; Biological Process: root development (GO:0048364);;	--	--	--	--	bHLH-MYC and R2R3-MYB transcription factors N-terminal	Transcription factor LHW GN=F12K2 OS=Arabidopsis thaliana (Mouse-ear cress) PE=1 SV=1	S	Function unknown	PREDICTED: transcription factor LHW-like isoform X1 [Vitis vinifera]
F01_transcript/2556	--	--	--	--	--	--	--	PWWP domain	Serine/threonine-protein kinase ATM GN=ATM OS=Arabidopsis thaliana (Mouse-ear cress) PE=2 SV=1	S	Function unknown	PREDICTED: uncharacterized protein LOC100852955 isoform X1 [Vitis vinifera]
F01_transcript/11251	[T]	Signal transduction mechanisms	Molecular Function: protein serine/threonine phosphatase activity (GO:0004722);; Biological Process: protein dephosphorylation (GO:0006470);; Molecular Function: metal ion binding (GO:0046872);;	K14497|7.13045e-126|pmum:103340536|K14497 protein phosphatase 2C [EC:3.1.3.16] | (RefSeq) protein phosphatase 2C 77	ko04075:Plant hormone signal transduction	[T]	Signal transduction mechanisms	Protein phosphatase 2C;; Protein phosphatase 2C	Protein phosphatase 2C 7 (Precursor) GN=HAB2 OS=Arabidopsis thaliana (Mouse-ear cress) PE=2 SV=2	T	Signal transduction mechanisms	PREDICTED: protein phosphatase 2C 77 [Prunus mume]
F01_transcript/946	[K]	Transcription	Molecular Function: protein serine/threonine kinase activity (GO:0004674);; Molecular Function: ATP binding (GO:0005524);; Biological Process: protein phosphorylation (GO:0006468);; Cellular Component: integral component of membrane (GO:0016021);; Molecular Function: oxidoreductase activity (GO:0016491);; Biological Process: oxidation-reduction process (GO:0055114);;	--	--	--	--	Protein kinase domain;; Protein tyrosine kinase;; Leucine rich repeat;; Leucine Rich repeats (2 copies);; Leucine rich repeat N-terminal domain	Probable leucine-rich repeat receptor-like protein kinase At5g63930 (Precursor) GN=At5g63930 OS=Arabidopsis thaliana (Mouse-ear cress) PE=2 SV=1	S	Function unknown	PREDICTED: probable leucine-rich repeat receptor-like protein kinase At2g33170 [Vitis vinifera]
F01_transcript/9289	--	--	Cellular Component: integral component of membrane (GO:0016021);;	--	--	--	--	Tetraspanin family	Tetraspanin-8 GN=TET8 OS=Arabidopsis thaliana (Mouse-ear cress) PE=2 SV=1	S	Function unknown	PREDICTED: tetraspanin-8-like [Nicotiana tomentosiformis]
F01_transcript/26971	--	--	--	--	--	--	--	WRKY DNA -binding domain;; WRKY DNA -binding domain	Probable WRKY transcription factor 70 GN=WRKY70 OS=Arabidopsis thaliana (Mouse-ear cress) PE=2 SV=1	K	Transcription	WRKY DNA-binding protein 70, putative isoform 1 [Theobroma cacao]
F01_transcript/32619	--	--	Molecular Function: calcium ion binding (GO:0005509);; Biological Process: trichome branching (GO:0010091);;	--	--	[ZD]	--	EF-hand domain pair	Calcium-binding protein KIC GN=KIC OS=Arabidopsis thaliana (Mouse-ear cress) PE=1 SV=2	DTZ	--	ccd1, putative [Ricinus communis]
F01_transcript/459	[K]	Transcription	Molecular Function: RNA binding (GO:0003723);; Molecular Function: helicase activity (GO:0004386);; Molecular Function: ribonuclease III activity (GO:0004525);; Molecular Function: ATP binding (GO:0005524);; Biological Process: RNA processing (GO:0006396);; Biological Process: response to stimulus (GO:0050896);; Biological Process: RNA phosphodiester bond hydrolysis, endonucleolytic (GO:0090502);;	K11592|0|cic:CICLE_v10010912mg|K11592 endoribonuclease Dicer [EC:3.1.26.-] | (RefSeq) hypothetical protein	--	[A]	RNA processing and modification	Helicase conserved C-terminal domain;; Dicer dimerisation domain;; PAZ domain;; DEAD/DEAH box helicase;; Type III restriction enzyme, res subunit;; Ribonuclease III domain;; Ribonuclease III domain;; Ribonuclease-III-like	Endoribonuclease Dicer homolog 2 GN=At3g03300 OS=Arabidopsis thaliana (Mouse-ear cress) PE=1 SV=2	K	Transcription	PREDICTED: endoribonuclease Dicer homolog 2-like isoform X6 [Citrus sinensis]
F01_transcript/9519	--	--	--	K10581|0|tcc:TCM_031512|K10581 ubiquitin-conjugating enzyme E2 O [EC:2.3.2.24] | (RefSeq) Ubiquitin-conjugating enzyme 25, putative isoform 1	ko04120:Ubiquitin mediated proteolysis	[O]	Posttranslational modification, protein turnover, chaperones	Ubiquitin-conjugating enzyme	Probable ubiquitin-conjugating enzyme E2 25 GN=UBC25 OS=Arabidopsis thaliana (Mouse-ear cress) PE=2 SV=1	O	Posttranslational modification, protein turnover, chaperones	PREDICTED: probable ubiquitin-conjugating enzyme E2 26 [Vitis vinifera]
F01_transcript/27940	--	--	Cellular Component: integral component of membrane (GO:0016021);;	--	--	--	--	Tetraspanin family	Tetraspanin-19 GN=TOM2AH3 OS=Arabidopsis thaliana (Mouse-ear cress) PE=2 SV=1	S	Function unknown	PREDICTED: tetraspanin-19 [Nicotiana sylvestris]
F01_transcript/29609	[T]	Signal transduction mechanisms	Cellular Component: plasma membrane (GO:0005886);; Biological Process: response to stress (GO:0006950);; Cellular Component: plasmodesma (GO:0009506);; Molecular Function: hydrolase activity (GO:0016787);;	--	--	--	--	Universal stress protein family	Universal stress protein A-like protein GN=At3g01520 OS=Arabidopsis thaliana (Mouse-ear cress) PE=1 SV=2	T	Signal transduction mechanisms	Adenine nucleotide alpha hydrolases-like superfamily protein [Theobroma cacao]
F01_transcript/16844	--	--	--	--	--	--	--	No apical meristem (NAM) protein	NAC domain-containing protein 86 {ECO:0000312|EMBL:AED92405.1} OS=Arabidopsis thaliana (Mouse-ear cress) PE=2 SV=1	S	Function unknown	PREDICTED: NAC domain-containing protein 45 [Sesamum indicum]
F01_transcript/32254	[J]	Translation, ribosomal structure and biogenesis	Molecular Function: structural constituent of ribosome (GO:0003735);; Cellular Component: ribosome (GO:0005840);; Biological Process: translation (GO:0006412);; Molecular Function: metal ion binding (GO:0046872);;	--	--	[J]	Translation, ribosomal structure and biogenesis	Ribosomal protein S27	40S ribosomal protein S27-2 OS=Arabidopsis thaliana (Mouse-ear cress) PE=2 SV=2	J	Translation, ribosomal structure and biogenesis	PREDICTED: 40S ribosomal protein S27-2-like [Nelumbo nucifera]
F01_transcript/1581	--	--	Cellular Component: intracellular (GO:0005622);; Biological Process: intracellular protein transport (GO:0006886);; Molecular Function: Ran GTPase binding (GO:0008536);;	K14290|0|vvi:100256288|K14290 exportin-1 | (RefSeq) protein EXPORTIN 1A	ko03008:Ribosome biogenesis in eukaryotes;ko03013:RNA transport	[YU]	--	CRM1 C terminal;; Exportin 1-like protein;; Importin-beta N-terminal domain	--	U	Intracellular trafficking, secretion, and vesicular transport	PREDICTED: exportin-1 [Vitis vinifera]
F01_transcript/20206	[O]	Posttranslational modification, protein turnover, chaperones	Biological Process: positive gravitropism (GO:0009958);;	--	--	[O]	Posttranslational modification, protein turnover, chaperones	DnaJ domain	Chaperone protein dnaJ 15 GN=T2E12.8 OS=Arabidopsis thaliana (Mouse-ear cress) PE=1 SV=1	O	Posttranslational modification, protein turnover, chaperones	PREDICTED: chaperone protein dnaJ 15 [Sesamum indicum]
F01_transcript/30292	--	--	Biological Process: mRNA splicing, via spliceosome (GO:0000398);; Cellular Component: spliceosomal complex (GO:0005681);;	K12873|1.37876e-99|cic:CICLE_v10003137mg|K12873 bud site selection protein 31 | (RefSeq) hypothetical protein	ko03040:Spliceosome	[K]	Transcription	G10 protein	Protein BUD31 homolog 2 OS=Oryza sativa subsp. japonica (Rice) PE=2 SV=1	DK	--	PREDICTED: protein BUD31 homolog 2 [Sesamum indicum]
F01_transcript/13863	--	--	--	--	--	--	--	Protein of unknown function (DUF688);; Protein of unknown function (DUF688)	--	S	Function unknown	unnamed protein product [Vitis vinifera]
F01_transcript/32678	--	--	Molecular Function: translation initiation factor activity (GO:0003743);; Molecular Function: translation elongation factor activity (GO:0003746);; Biological Process: translational initiation (GO:0006413);; Biological Process: translational frameshifting (GO:0006452);; Molecular Function: ribosome binding (GO:0043022);; Biological Process: positive regulation of translational elongation (GO:0045…	K03263|1.43183e-29|pxb:103947216|K03263 translation initiation factor 5A | (RefSeq) eukaryotic translation initiation factor 5A-2	--	[J]	Translation, ribosomal structure and biogenesis	Eukaryotic elongation factor 5A hypusine, DNA-binding OB fold	Eukaryotic translation initiation factor 5A-2 GN=EIF-5A2 OS=Nicotiana plumbaginifolia (Leadwort-leaved tobacco) PE=2 SV=1	J	Translation, ribosomal structure and biogenesis	PREDICTED: eukaryotic translation initiation factor 5A-2-like, partial [Nicotiana sylvestris]
F01_transcript/28124	[O]	Posttranslational modification, protein turnover, chaperones	Biological Process: protein peptidyl-prolyl isomerization (GO:0000413);; Molecular Function: peptidyl-prolyl cis-trans isomerase activity (GO:0003755);; Cellular Component: cytoplasm (GO:0005737);; Biological Process: protein folding (GO:0006457);; Molecular Function: peptide binding (GO:0042277);;	--	--	[O]	Posttranslational modification, protein turnover, chaperones	Cyclophilin type peptidyl-prolyl cis-trans isomerase/CLD	Peptidyl-prolyl cis-trans isomerase GN=PCKR1 OS=Catharanthus roseus (Madagascar periwinkle) PE=1 SV=1	O	Posttranslational modification, protein turnover, chaperones	PREDICTED: peptidyl-prolyl cis-trans isomerase [Cucumis melo]
F01_transcript/5776	[O]	Posttranslational modification, protein turnover, chaperones	Cellular Component: endoplasmic reticulum (GO:0005783);; Cellular Component: integral component of membrane (GO:0016021);;	--	--	[OR]	--	Peptidase family M28	--	S	Function unknown	PREDICTED: endoplasmic reticulum metallopeptidase 1 [Vitis vinifera]
F01_transcript/1076	[K]	Transcription	--	--	--	[T]	Signal transduction mechanisms	Leucine Rich repeats (2 copies);; Leucine rich repeat;; NB-ARC domain	Putative disease resistance protein RGA3 GN=RGA3 OS=Solanum bulbocastanum (Wild potato) PE=2 SV=2	S	Function unknown	PREDICTED: putative disease resistance protein RGA3-like isoform X1 [Citrus sinensis]
F01_transcript/25606	[G]	Carbohydrate transport and metabolism	Cellular Component: vacuole (GO:0005773);; Cellular Component: integral component of plasma membrane (GO:0005887);; Biological Process: water transport (GO:0006833);; Biological Process: response to water deprivation (GO:0009414);; Cellular Component: plasmodesma (GO:0009506);; Biological Process: cellular water homeostasis (GO:0009992);; Molecular Function: water channel activity (GO:0015250);; …	K09872|0|cic:CICLE_v10021502mg|K09872 aquaporin PIP | (RefSeq) hypothetical protein	--	[G]	Carbohydrate transport and metabolism	Major intrinsic protein	Probable aquaporin PIP1-4 OS=Arabidopsis thaliana (Mouse-ear cress) PE=1 SV=1	G	Carbohydrate transport and metabolism	hypothetical protein CICLE_v10021502mg [Citrus clementina]
F01_transcript/7797	[O]	Posttranslational modification, protein turnover, chaperones	--	--	--	--	--	Domain of unknown function (DUF3444);; DnaJ domain	Chaperone protein dnaJ 49 OS=Arabidopsis thaliana (Mouse-ear cress) PE=2 SV=2	O	Posttranslational modification, protein turnover, chaperones	PREDICTED: uncharacterized protein LOC100240890 isoform X1 [Vitis vinifera]
F01_transcript/18879	--	--	Biological Process: vesicle-mediated transport (GO:0016192);; Molecular Function: kinase activity (GO:0016301);; Biological Process: phosphorylation (GO:0016310);; Cellular Component: intracellular membrane-bounded organelle (GO:0043231);;	--	--	[V]	Defense mechanisms	Fungal domain of unknown function (DUF1712)	--	S	Function unknown	F23A5.27 isoform 5 [Theobroma cacao]
F01_transcript/3996	--	--	Molecular Function: nucleic acid binding (GO:0003676);;	K13192|0|vvi:100259455|K13192 RNA-binding protein 26 | (RefSeq) zinc finger CCCH domain-containing protein 41	--	[R]	General function prediction only	RNA recognition motif. (a.k.a. RRM, RBD, or RNP domain);; Nup53/35/40-type RNA recognition motif	Zinc finger CCCH domain-containing protein 41 GN=At3g27700 OS=Arabidopsis thaliana (Mouse-ear cress) PE=1 SV=1	S	Function unknown	PREDICTED: zinc finger CCCH domain-containing protein 41 [Vitis vinifera]
F01_transcript/11206	--	--	Molecular Function: mRNA binding (GO:0003729);; Cellular Component: nucleus (GO:0005634);; Biological Process: mRNA cleavage (GO:0006379);; Biological Process: mRNA processing (GO:0006397);; Biological Process: gene silencing by RNA (GO:0031047);; Biological Process: RNA 3'-end processing (GO:0031123);; Biological Process: antisense RNA metabolic process (GO:0042868);; Biological Process: negativ…	K14408|0|vvi:100262033|K14408 cleavage stimulation factor subunit 3 | (RefSeq) cleavage stimulation factor subunit 77	ko03015:mRNA surveillance pathway	[A]	RNA processing and modification	Suppressor of forked protein (Suf);; Tetratricopeptide repeat;; Tetratricopeptide repeat	Cleavage stimulation factor subunit 77 {ECO:0000303|PubMed:12379796} OS=Arabidopsis thaliana (Mouse-ear cress) PE=1 SV=1	A	RNA processing and modification	PREDICTED: cleavage stimulation factor subunit 77 isoform X1 [Vitis vinifera]
F01_transcript/4456	[P]	Inorganic ion transport and metabolism	Molecular Function: zinc ion transmembrane transporter activity (GO:0005385);; Cellular Component: Golgi apparatus (GO:0005794);; Biological Process: response to zinc ion (GO:0010043);; Cellular Component: integral component of membrane (GO:0016021);; Biological Process: regulation of sequestering of zinc ion (GO:0061088);; Biological Process: zinc II ion transmembrane transport (GO:0071577);;	K14692|5.09984e-170|vvi:100252487|K14692 solute carrier family 30 (zinc transporter), member 5/7 | (RefSeq) zinc transporter 5	--	[P]	Inorganic ion transport and metabolism	Cation efflux family	Metal tolerance protein 12 GN=MTP12 OS=Arabidopsis thaliana (Mouse-ear cress) PE=3 SV=1	P	Inorganic ion transport and metabolism	PREDICTED: zinc transporter 5 [Vitis vinifera]
F01_transcript/1322	[V]	Defense mechanisms	Molecular Function: ATP binding (GO:0005524);; Cellular Component: integral component of membrane (GO:0016021);; Molecular Function: ATPase activity, coupled to transmembrane movement of substances (GO:0042626);; Biological Process: transmembrane transport (GO:0055085);;	K05658|0|pper:PRUPE_ppa000340mg|K05658 ATP-binding cassette, subfamily B (MDR/TAP), member 1 [EC:3.6.3.44] | (RefSeq) hypothetical protein	ko02010:ABC transporters	[Q]	Secondary metabolites biosynthesis, transport and catabolism	ABC transporter transmembrane region;; ABC transporter;; RecF/RecN/SMC N terminal domain;; AAA ATPase domain;; P-loop containing region of AAA domain;; Predicted ATPase of the ABC class;; Zeta toxin;; ATPase family associated with various cellular activities (AAA)	ABC transporter B family member 2 (Precursor) GN=F20B18.70 OS=Arabidopsis thaliana (Mouse-ear cress) PE=1 SV=3	V	Defense mechanisms	unnamed protein product [Coffea canephora]
F01_transcript/3909	[J]	Translation, ribosomal structure and biogenesis	Biological Process: mRNA splicing, via spliceosome (GO:0000398);; Molecular Function: ATP-dependent RNA helicase activity (GO:0004004);; Molecular Function: ATP binding (GO:0005524);; Cellular Component: spliceosomal complex (GO:0005681);; Cellular Component: cytoplasm (GO:0005737);; Molecular Function: RNA binding (GO:0044822);;	K12815|0|vvi:100261447|K12815 pre-mRNA-splicing factor ATP-dependent RNA helicase DHX38/PRP16 [EC:3.6.4.13] | (RefSeq) pre-mRNA-splicing factor ATP-dependent RNA helicase DEAH7	ko03040:Spliceosome	[A]	RNA processing and modification	Helicase associated domain (HA2);; Oligonucleotide/oligosaccharide-binding (OB)-fold;; Helicase conserved C-terminal domain;; DEAD/DEAH box helicase;; Uncharacterized conserved protein (DUF2075)	Probable pre-mRNA-splicing factor ATP-dependent RNA helicase GN=At3g26560 OS=Arabidopsis thaliana (Mouse-ear cress) PE=1 SV=2	L	Replication, recombination and repair	PREDICTED: pre-mRNA-splicing factor ATP-dependent RNA helicase PRP16 [Vitis vinifera]
F01_transcript/8800	[T]	Signal transduction mechanisms	Molecular Function: protein serine/threonine kinase activity (GO:0004674);; Molecular Function: transmembrane receptor protein tyrosine kinase activity (GO:0004714);; Molecular Function: ATP binding (GO:0005524);; Biological Process: signal transduction (GO:0007165);; Cellular Component: integral component of membrane (GO:0016021);; Biological Process: peptidyl-tyrosine phosphorylation (GO:001810…	K13416|0|tcc:TCM_007534|K13416 brassinosteroid insensitive 1-associated receptor kinase 1 [EC:2.7.10.1 2.7.11.1] | (RefSeq) BRI1-associated receptor kinase	ko04075:Plant hormone signal transduction;ko04626:Plant-pathogen interaction	--	--	Protein kinase domain;; Protein tyrosine kinase;; Leucine rich repeat N-terminal domain;; Leucine Rich repeats (2 copies);; Leucine rich repeat;; Leucine Rich Repeat	BRASSINOSTEROID INSENSITIVE 1-associated receptor kinase 1 (Precursor) GN=F17M5.190 OS=Arabidopsis thaliana (Mouse-ear cress) PE=1 SV=2	T	Signal transduction mechanisms	PREDICTED: BRASSINOSTEROID INSENSITIVE 1-associated receptor kinase 1-like [Sesamum indicum]
F01_transcript/4697	--	--	Molecular Function: binding (GO:0005488);;	--	--	--	--	Plus-3 domain	--	S	Function unknown	PREDICTED: uncharacterized protein LOC100244302 isoform X4 [Vitis vinifera]
F01_transcript/18799	--	--	--	--	--	[R]	General function prediction only	F-box domain;; F-box-like;; Leucine Rich repeats (2 copies)	F-box protein At1g47056 GN=At1g47056 OS=Arabidopsis thaliana (Mouse-ear cress) PE=2 SV=1	S	Function unknown	hypothetical protein JCGZ_16096 [Jatropha curcas]
F01_transcript/2577	--	--	--	--	--	[R]	General function prediction only	PPR repeat family;; PPR repeat;; PPR repeat;; Pentatricopeptide repeat domain;; Pentacotripeptide-repeat region of PRORP;; Tetratricopeptide repeat;; Tetratricopeptide repeat;; Tetratricopeptide repeat;; Anaphase-promoting complex, cyclosome, subunit 3	Pentatricopeptide repeat-containing protein At5g27270 OS=Arabidopsis thaliana (Mouse-ear cress) PE=2 SV=2	S	Function unknown	PREDICTED: pentatricopeptide repeat-containing protein At5g27270 [Vitis vinifera]
F01_transcript/22949	[E]	Amino acid transport and metabolism	Molecular Function: L-tyrosine:2-oxoglutarate aminotransferase activity (GO:0004838);; Biological Process: cellular amino acid metabolic process (GO:0006520);; Biological Process: vitamin E biosynthetic process (GO:0010189);; Molecular Function: pyridoxal phosphate binding (GO:0030170);; Molecular Function: L-phenylalanine:2-oxoglutarate aminotransferase activity (GO:0080130);;	K00815|0|pop:POPTR_0011s11570g|K00815 tyrosine aminotransferase [EC:2.6.1.5] | (RefSeq) POPTRDRAFT_568851; hypothetical protein	ko00130:Ubiquinone and other terpenoid-quinone biosynthesis;ko00270:Cysteine and methionine metabolism;ko00350:Tyrosine metabolism;ko00360:Phenylalanine metabolism;ko00400:Phenylalanine, tyrosine and tryptophan biosynthesis;ko00950:Isoquinoline alkaloid biosynthesis;ko00960:Tropane, piperidine and pyridine alkaloid biosynthesis;ko01230:Biosynthesis of amino acids	[E]	Amino acid transport and metabolism	Aminotransferase class I and II;; Beta-eliminating lyase	Probable aminotransferase TAT2 GN=At5g53970 OS=Arabidopsis thaliana (Mouse-ear cress) PE=2 SV=1	E	Amino acid transport and metabolism	hypothetical protein POPTR_0011s11570g [Populus trichocarpa]
F01_transcript/27356	--	--	Cellular Component: mitochondrion (GO:0005739);; Molecular Function: cobalt ion binding (GO:0050897);; Biological Process: mitochondrial RNA modification (GO:1900864);;	--	--	--	--	--	Uncharacterized protein At3g15000, mitochondrial GN=At3g15000 OS=Arabidopsis thaliana (Mouse-ear cress) PE=1 SV=1	S	Function unknown	PREDICTED: uncharacterized protein At3g15000, mitochondrial [Vitis vinifera]
F01_transcript/14195	[T]	Signal transduction mechanisms	Molecular Function: protein kinase activity (GO:0004672);; Molecular Function: ATP binding (GO:0005524);; Cellular Component: plasma membrane (GO:0005886);; Biological Process: protein phosphorylation (GO:0006468);; Cellular Component: integral component of membrane (GO:0016021);;	--	--	--	--	Protein tyrosine kinase;; Protein kinase domain;; Leucine Rich repeats (2 copies);; Leucine rich repeat;; Leucine rich repeat N-terminal domain	Probable leucine-rich repeat receptor-like protein kinase At1g68400 (Precursor) GN=At1g68400 OS=Arabidopsis thaliana (Mouse-ear cress) PE=2 SV=1	T	Signal transduction mechanisms	PREDICTED: probable leucine-rich repeat receptor-like protein kinase At1g68400 [Vitis vinifera]
F01_transcript/18698	[H]	Coenzyme transport and metabolism	Molecular Function: 4-aminobutyrate transaminase activity (GO:0003867);; Molecular Function: pyridoxal phosphate binding (GO:0030170);; Molecular Function: identical protein binding (GO:0042802);;	K16871|0|tcc:TCM_002027|K16871 4-aminobutyrate---pyruvate transaminase [EC:2.6.1.96] | (RefSeq) Pyridoxal phosphate-dependent transferases superfamily protein	ko00250:Alanine, aspartate and glutamate metabolism;ko00650:Butanoate metabolism	[E]	Amino acid transport and metabolism	Aminotransferase class-III	Gamma aminobutyrate transaminase 1, mitochondrial (Precursor) GN=GABA-TP1 OS=Solanum lycopersicum (Tomato) PE=1 SV=1	E	Amino acid transport and metabolism	PREDICTED: gamma aminobutyrate transaminase 3, chloroplastic [Eucalyptus grandis]
F01_transcript/10887	--	--	Cellular Component: chloroplast thylakoid (GO:0009534);; Cellular Component: chloroplast stroma (GO:0009570);; Biological Process: photosynthetic electron transport chain (GO:0009767);; Biological Process: post-embryonic development (GO:0009791);; Molecular Function: FMN binding (GO:0010181);; Molecular Function: oxidoreductase activity (GO:0016491);; Molecular Function: protein anchor (GO:004349…	--	--	--	--	--	Glutamyl-tRNA reductase-binding protein, chloroplastic {ECO:0000303|PubMed:22180625} (Precursor) OS=Arabidopsis thaliana (Mouse-ear cress) PE=1 SV=1	S	Function unknown	unnamed protein product [Vitis vinifera]
F01_transcript/22563	--	--	--	--	--	--	--	MYND finger	F-box protein At1g67340 GN=At1g67340 OS=Arabidopsis thaliana (Mouse-ear cress) PE=1 SV=1	S	Function unknown	HCP-like superfamily protein with MYND-type zinc finger [Theobroma cacao]
F01_transcript/8211	--	--	Cellular Component: nuclear telomere cap complex (GO:0000783);; Molecular Function: double-stranded telomeric DNA binding (GO:0003691);; Biological Process: telomeric loop formation (GO:0031627);;	--	--	--	--	--	Telomere repeat-binding protein 5 GN=F22G5.8 OS=Arabidopsis thaliana (Mouse-ear cress) PE=1 SV=2	K	Transcription	PREDICTED: telomere repeat-binding protein 5 [Vitis vinifera]
F01_transcript/24581	[M]	Cell wall/membrane/envelope biogenesis	Molecular Function: dihydrokaempferol 4-reductase activity (GO:0045552);; Molecular Function: coenzyme binding (GO:0050662);; Biological Process: oxidation-reduction process (GO:0055114);;	--	--	[V]	Defense mechanisms	NAD dependent epimerase/dehydratase family;; NAD(P)H-binding;; GDP-mannose 4,6 dehydratase;; 3-beta hydroxysteroid dehydrogenase/isomerase family;; Male sterility protein;; NmrA-like family;; KR domain;; Polysaccharide biosynthesis protein	Dihydroflavonol-4-reductase GN=DFR OS=Vitis vinifera (Grape) PE=1 SV=1	M	Cell wall/membrane/envelope biogenesis	PREDICTED: dihydroflavonol-4-reductase [Vitis vinifera]
F01_transcript/19692	[IQ]	--	Molecular Function: ATP binding (GO:0005524);; Biological Process: phenylpropanoid metabolic process (GO:0009698);; Molecular Function: 4-coumarate-CoA ligase activity (GO:0016207);;	K01904|0|sot:102584603|K01904 4-coumarate--CoA ligase [EC:6.2.1.12] | (RefSeq) 4-coumarate--CoA ligase 2	ko00130:Ubiquinone and other terpenoid-quinone biosynthesis;ko00360:Phenylalanine metabolism;ko00940:Phenylpropanoid biosynthesis	[I]	Lipid transport and metabolism	AMP-binding enzyme;; AMP-binding enzyme C-terminal domain	4-coumarate--CoA ligase 1 GN=4CL1 OS=Nicotiana tabacum (Common tobacco) PE=2 SV=1	IQ	--	4-coumarate:CoA ligase [Petunia x hybrida]
F01_transcript/9268	--	--	Cellular Component: integral component of membrane (GO:0016021);; Biological Process: transmembrane transport (GO:0055085);;	K13754|0|vvi:100249061|K13754 solute carrier family 24 (sodium/potassium/calcium exchanger), member 6 | (RefSeq) cation/calcium exchanger 4	--	[P]	Inorganic ion transport and metabolism	Sodium/calcium exchanger protein	Cation/calcium exchanger 4 GN=F15I1.21 OS=Arabidopsis thaliana (Mouse-ear cress) PE=2 SV=1	P	Inorganic ion transport and metabolism	PREDICTED: cation/calcium exchanger 4-like [Nelumbo nucifera]
F01_transcript/4752	[E]	Amino acid transport and metabolism	Molecular Function: GMP synthase activity (GO:0003921);; Molecular Function: GMP synthase (glutamine-hydrolyzing) activity (GO:0003922);; Cellular Component: cytosol (GO:0005829);; Biological Process: GMP biosynthetic process (GO:0006177);; Molecular Function: transferase activity, transferring glycosyl groups (GO:0016757);;	--	--	--	--	Glycosyl transferase family, helical bundle domain	--	E	Amino acid transport and metabolism	PREDICTED: uncharacterized protein LOC100256184 [Vitis vinifera]
F01_transcript/10994	[M]	Cell wall/membrane/envelope biogenesis	Cellular Component: Golgi membrane (GO:0000139);; Cellular Component: integral component of membrane (GO:0016021);; Biological Process: pectin biosynthetic process (GO:0045489);; Molecular Function: polygalacturonate 4-alpha-galacturonosyltransferase activity (GO:0047262);; Biological Process: cell wall organization (GO:0071555);;	K13648|0|sot:102590887|K13648 alpha-1,4-galacturonosyltransferase [EC:2.4.1.43] | (RefSeq) probable galacturonosyltransferase 4	ko00500:Starch and sucrose metabolism;ko00520:Amino sugar and nucleotide sugar metabolism	--	--	Glycosyl transferase family 8	Probable galacturonosyltransferase 4 GN=MCA23.10 OS=Arabidopsis thaliana (Mouse-ear cress) PE=2 SV=1	G	Carbohydrate transport and metabolism	PREDICTED: probable galacturonosyltransferase 4 [Sesamum indicum]
F01_transcript/15170	[EH]	--	Molecular Function: magnesium ion binding (GO:0000287);; Cellular Component: cytosol (GO:0005829);; Molecular Function: lyase activity (GO:0016829);; Molecular Function: thiamine pyrophosphate binding (GO:0030976);;	K12261|0|sly:101264774|K12261 2-hydroxyacyl-CoA lyase 1 [EC:4.1.-.-] | (RefSeq) 2-hydroxyacyl-CoA lyase	ko04146:Peroxisome	[EH]	--	Thiamine pyrophosphate enzyme, N-terminal TPP binding domain;; Thiamine pyrophosphate enzyme, central domain;; Thiamine pyrophosphate enzyme, C-terminal TPP binding domain	2-hydroxyacyl-CoA lyase GN=T10B6.40 OS=Arabidopsis thaliana (Mouse-ear cress) PE=1 SV=1	E	Amino acid transport and metabolism	PREDICTED: 2-hydroxyacyl-CoA lyase [Solanum lycopersicum]
F01_transcript/25942	[T]	Signal transduction mechanisms	Molecular Function: protein serine/threonine phosphatase activity (GO:0004722);; Biological Process: protein dephosphorylation (GO:0006470);;	--	--	[T]	Signal transduction mechanisms	Protein phosphatase 2C	Probable protein phosphatase 2C 58 GN=At4g28400 OS=Arabidopsis thaliana (Mouse-ear cress) PE=2 SV=1	T	Signal transduction mechanisms	PREDICTED: probable protein phosphatase 2C 58 [Sesamum indicum]
F01_transcript/33047	--	--	Cellular Component: commitment complex (GO:0000243);; Biological Process: spliceosomal complex assembly (GO:0000245);; Biological Process: spliceosomal snRNP assembly (GO:0000387);; Molecular Function: RNA binding (GO:0003723);; Cellular Component: U5 snRNP (GO:0005682);; Cellular Component: U1 snRNP (GO:0005685);; Cellular Component: U2 snRNP (GO:0005686);; Cellular Component: U4 snRNP (GO:00056…	--	--	[A]	RNA processing and modification	LSM domain	Probable U6 snRNA-associated Sm-like protein LSm4 OS=Nicotiana tabacum (Common tobacco) PE=2 SV=1	K	Transcription	unnamed protein product [Vitis vinifera]
F01_transcript/26888	[O]	Posttranslational modification, protein turnover, chaperones	Molecular Function: peroxidase activity (GO:0004601);; Cellular Component: chloroplast thylakoid (GO:0009534);; Molecular Function: peroxiredoxin activity (GO:0051920);; Biological Process: oxidation-reduction process (GO:0055114);; Biological Process: cellular oxidant detoxification (GO:0098869);;	K03564|1.13977e-101|pop:POPTR_0006s13980g|K03564 peroxiredoxin Q/BCP [EC:1.11.1.15] | (RefSeq) peroxiredoxin Q family protein	--	[O]	Posttranslational modification, protein turnover, chaperones	AhpC/TSA family;; Redoxin	Peroxiredoxin Q, chloroplastic (Precursor) GN=PRXQ OS=Populus jackii (Balm of Gilead) PE=1 SV=1	O	Posttranslational modification, protein turnover, chaperones	RecName: Full=Peroxiredoxin Q, chloroplastic; AltName: Full=Thioredoxin reductase; Flags: Precursor [Populus x jackii]
F01_transcript/7086	--	--	Molecular Function: catalytic activity (GO:0003824);;	--	--	[S]	Function unknown	Protein similar to CwfJ C-terminus 1;; Protein similar to CwfJ C-terminus 2	Zinc finger CCCH domain-containing protein 59 GN=OJ1001_G09.14 OS=Oryza sativa subsp. japonica (Rice) PE=2 SV=1	S	Function unknown	PREDICTED: CWF19-like protein 2 [Vitis vinifera]
F01_transcript/12818	[P]	Inorganic ion transport and metabolism	Molecular Function: transporter activity (GO:0005215);; Cellular Component: integral component of membrane (GO:0016021);; Biological Process: anion transmembrane transport (GO:0098656);;	--	--	--	--	Citrate transporter	--	P	Inorganic ion transport and metabolism	hypothetical protein CICLE_v10028086mg [Citrus clementina]
F01_transcript/31446	--	--	--	--	--	--	--	Dormancy/auxin associated protein	Auxin-repressed 12.5 kDa protein OS=Fragaria ananassa (Strawberry) PE=2 SV=1	S	Function unknown	Auxin-repressed 12.5 kDa [Gossypium arboreum]
F01_transcript/14528	--	--	Cellular Component: integral component of membrane (GO:0016021);;	K17086|0|vvi:100259978|K17086 transmembrane 9 superfamily member 2/4 | (RefSeq) transmembrane 9 superfamily member 7	--	[U]	Intracellular trafficking, secretion, and vesicular transport	Endomembrane protein 70	Transmembrane 9 superfamily member 7 {ECO:0000305} (Precursor) OS=Arabidopsis thaliana (Mouse-ear cress) PE=2 SV=1	S	Function unknown	unnamed protein product [Coffea canephora]
F01_transcript/12410	[P]	Inorganic ion transport and metabolism	Cellular Component: Golgi membrane (GO:0000139);; Molecular Function: magnesium ion binding (GO:0000287);; Molecular Function: phospholipid-translocating ATPase activity (GO:0004012);; Molecular Function: ATP binding (GO:0005524);; Cellular Component: trans-Golgi network (GO:0005802);; Cellular Component: plasma membrane (GO:0005886);; Cellular Component: integral component of membrane (GO:001602…	K01530|0|cit:102615375|K01530 phospholipid-translocating ATPase [EC:3.6.3.1] | (RefSeq) probable phospholipid-transporting ATPase 8	--	[R]	General function prediction only	Phospholipid-translocating P-type ATPase C-terminal;; Cation transport ATPase (P-type);; haloacid dehalogenase-like hydrolase	Putative phospholipid-transporting ATPase 8 GN=ALA8 OS=Arabidopsis thaliana (Mouse-ear cress) PE=3 SV=1	U	Intracellular trafficking, secretion, and vesicular transport	PREDICTED: putative phospholipid-transporting ATPase 8-like [Citrus sinensis]
F01_transcript/8996	--	--	--	--	--	--	--	Helix-loop-helix DNA-binding domain	Transcription factor BIM1 GN=T22D6.70 OS=Arabidopsis thaliana (Mouse-ear cress) PE=1 SV=2	K	Transcription	PREDICTED: transcription factor BIM1 isoform X1 [Vitis vinifera]
F01_transcript/14260	--	--	--	--	--	--	--	--	--	S	Function unknown	PREDICTED: uncharacterized protein LOC100242269 [Vitis vinifera]
F01_transcript/34111	--	--	Molecular Function: translation initiation factor activity (GO:0003743);; Biological Process: translational initiation (GO:0006413);;	K03238|1.06811e-20|vvi:100263785|K03238 translation initiation factor 2 subunit 2 | (RefSeq) eukaryotic translation initiation factor 2 subunit beta	ko03013:RNA transport	[J]	Translation, ribosomal structure and biogenesis	--	Eukaryotic translation initiation factor 2 subunit beta OS=Malus domestica (Apple) PE=2 SV=2	J	Translation, ribosomal structure and biogenesis	unnamed protein product [Vitis vinifera]
F01_transcript/14100	[O]	Posttranslational modification, protein turnover, chaperones	Molecular Function: ATP binding (GO:0005524);; Cellular Component: endoplasmic reticulum (GO:0005783);; Cellular Component: integral component of membrane (GO:0016021);; Molecular Function: 2-alkenal reductase [NAD(P)] activity (GO:0032440);; Biological Process: oxidation-reduction process (GO:0055114);;	K09490|0|cmo:103482828|K09490 heat shock 70kDa protein 5 | (RefSeq) luminal-binding protein 5	ko03060:Protein export;ko04141:Protein processing in endoplasmic reticulum	[O]	Posttranslational modification, protein turnover, chaperones	Hsp70 protein;; MreB/Mbl protein	Luminal-binding protein (Precursor) OS=Solanum lycopersicum (Tomato) PE=1 SV=1	O	Posttranslational modification, protein turnover, chaperones	PREDICTED: luminal-binding protein 5 [Cucumis melo]
F01_transcript/9137	[T]	Signal transduction mechanisms	Biological Process: activation of MAPKK activity (GO:0000186);; Molecular Function: MAP kinase kinase kinase activity (GO:0004709);; Molecular Function: ATP binding (GO:0005524);; Cellular Component: intracellular (GO:0005622);; Cellular Component: plasma membrane (GO:0005886);; Cellular Component: integral component of membrane (GO:0016021);;	K04733|0|vvi:100259828|K04733 interleukin-1 receptor-associated kinase 4 [EC:2.7.11.1] | (RefSeq) cysteine-rich receptor-like protein kinase 2	--	--	--	Protein kinase domain;; Protein tyrosine kinase;; Salt stress response/antifungal	Cysteine-rich receptor-like protein kinase 3 (Precursor) GN=CRK3 OS=Arabidopsis thaliana (Mouse-ear cress) PE=2 SV=1	T	Signal transduction mechanisms	PREDICTED: cysteine-rich receptor-like protein kinase 2 [Vitis vinifera]
F01_transcript/3030	[C]	Energy production and conversion	Cellular Component: cytosol (GO:0005829);; Biological Process: tricarboxylic acid cycle (GO:0006099);; Molecular Function: phosphoenolpyruvate carboxylase activity (GO:0008964);; Cellular Component: chloroplast (GO:0009507);; Biological Process: carbon fixation (GO:0015977);; Molecular Function: 2-alkenal reductase [NAD(P)] activity (GO:0032440);; Cellular Component: apoplast (GO:0048046);; Biolo…	K01595|0|tcc:TCM_031773|K01595 phosphoenolpyruvate carboxylase [EC:4.1.1.31] | (RefSeq) Phosphoenolpyruvate carboxylase 3 isoform 1	ko00620:Pyruvate metabolism;ko00710:Carbon fixation in photosynthetic organisms;ko01200:Carbon metabolism	--	--	Phosphoenolpyruvate carboxylase	Phosphoenolpyruvate carboxylase 2 GN=PPCC OS=Flaveria trinervia (Clustered yellowtops) PE=1 SV=1	C	Energy production and conversion	Phosphoenolpyruvate carboxylase, housekeeping isozyme [Gossypium arboreum]
F01_transcript/24547	[I]	Lipid transport and metabolism	Cellular Component: nucleus (GO:0005634);; Cellular Component: endoplasmic reticulum (GO:0005783);; Biological Process: phospholipid metabolic process (GO:0006644);; Cellular Component: integral component of membrane (GO:0016021);; Molecular Function: plasmalogen synthase activity (GO:0050200);;	K13510|0|cit:102624675|K13510 lysophosphatidylcholine acyltransferase / lyso-PAF acetyltransferase [EC:2.3.1.23 2.3.1.67] | (RefSeq) lysophospholipid acyltransferase LPEAT1	ko00564:Glycerophospholipid metabolism;ko00565:Ether lipid metabolism	[I]	Lipid transport and metabolism	Acyltransferase	Lysophospholipid acyltransferase LPEAT1 GN=LPEAT1 OS=Arabidopsis thaliana (Mouse-ear cress) PE=1 SV=1	I	Lipid transport and metabolism	PREDICTED: lysophospholipid acyltransferase LPEAT1-like isoform X2 [Citrus sinensis]
F01_transcript/19498	--	--	Cellular Component: cytosol (GO:0005829);; Cellular Component: integral component of membrane (GO:0016021);;	--	--	[I]	Lipid transport and metabolism	Oxysterol-binding protein	Oxysterol-binding protein-related protein 3C GN=ORP3C OS=Arabidopsis thaliana (Mouse-ear cress) PE=2 SV=1	S	Function unknown	PREDICTED: oxysterol-binding protein-related protein 3C [Vitis vinifera]
F01_transcript/25774	--	--	Cellular Component: nucleus (GO:0005634);; Cellular Component: cytosol (GO:0005829);; Biological Process: Golgi organization (GO:0007030);; Biological Process: nuclear envelope reassembly (GO:0031468);; Molecular Function: ubiquitin binding (GO:0043130);; Biological Process: proteasome-mediated ubiquitin-dependent protein catabolic process (GO:0043161);; Biological Process: membrane fusion (GO:00…	K14012|7.0159e-145|cit:102613799|K14012 UBX domain-containing protein 1 | (RefSeq) plant UBX domain-containing protein 4	ko04141:Protein processing in endoplasmic reticulum	[Y]	Nuclear structure	SEP domain;; UBX domain	UBA and UBX domain-containing protein At4g15410 GN=At4g15410 OS=Arabidopsis thaliana (Mouse-ear cress) PE=1 SV=1	O	Posttranslational modification, protein turnover, chaperones	PREDICTED: UBA and UBX domain-containing protein At4g15410 [Eucalyptus grandis]
F01_transcript/2857	--	--	--	K11723|0|vvi:100267501|K11723 bromodomain-containing protein 7/9 | (RefSeq) uncharacterized LOC100267501	--	--	--	Bromodomain	Transcription factor GTE11 OS=Arabidopsis thaliana (Mouse-ear cress) PE=1 SV=1	BK	--	Bromodomain-containing protein, putative [Theobroma cacao]
F01_transcript/30033	[R]	General function prediction only	--	--	--	--	--	Uncharacterised protein domain (DUF2415)	Protein Mut11 GN=Mut11 OS=Chlamydomonas reinhardtii (Chlamydomonas smithii) PE=2 SV=1	S	Function unknown	PREDICTED: uncharacterized WD repeat-containing protein C2A9.03 [Sesamum indicum]
F01_transcript/4255	[T]	Signal transduction mechanisms	Molecular Function: structural molecule activity (GO:0005198);; Biological Process: protein phosphorylation (GO:0006468);; Biological Process: intracellular protein transport (GO:0006886);; Biological Process: vesicle-mediated transport (GO:0016192);; Molecular Function: myosin heavy chain kinase activity (GO:0016905);; Cellular Component: membrane coat (GO:0030117);;	K17302|0|cit:102622899|K17302 coatomer subunit beta' | (RefSeq) coatomer subunit beta'-2-like	--	[U]	Intracellular trafficking, secretion, and vesicular transport	Coatomer WD associated region;; WD domain, G-beta repeat;; Anaphase-promoting complex subunit 4 WD40 domain	Coatomer subunit beta&apos;-1 GN=At1g79990 OS=Arabidopsis thaliana (Mouse-ear cress) PE=2 SV=2	S	Function unknown	PREDICTED: coatomer subunit beta&apos;-2-like isoform X1 [Citrus sinensis]
F01_transcript/29289	[O]	Posttranslational modification, protein turnover, chaperones	Cellular Component: endoplasmic reticulum (GO:0005783);;	K13993|2.43194e-65|tcc:TCM_036433|K13993 HSP20 family protein | (RefSeq) HSP20-like chaperones superfamily protein	ko04141:Protein processing in endoplasmic reticulum	[O]	Posttranslational modification, protein turnover, chaperones	Hsp20/alpha crystallin family;; CS domain	22.0 kDa class IV heat shock protein (Precursor) GN=HSP22.0 OS=Glycine max (Soybean) PE=3 SV=1	O	Posttranslational modification, protein turnover, chaperones	hypothetical protein JCGZ_06695 [Jatropha curcas]
F01_transcript/290	[T]	Signal transduction mechanisms	Molecular Function: ATP binding (GO:0005524);; Cellular Component: plasma membrane (GO:0005886);; Cellular Component: integral component of membrane (GO:0016021);; Biological Process: cuticle development (GO:0042335);; Molecular Function: ATPase activity, coupled to transmembrane movement of substances (GO:0042626);; Biological Process: transmembrane transport (GO:0055085);;	--	--	[Q]	Secondary metabolites biosynthesis, transport and catabolism	ABC-2 type transporter;; Plant PDR ABC transporter associated;; ABC transporter;; ABC-transporter extracellular N-terminal;; P-loop containing region of AAA domain;; ABC-2 type transporter;; ABC transporter	ABC transporter G family member 32 GN=F12C20.5 OS=Arabidopsis thaliana (Mouse-ear cress) PE=1 SV=1	V	Defense mechanisms	Pleiotropic drug resistance 4 [Theobroma cacao]
F01_transcript/28595	--	--	Cellular Component: cullin-RING ubiquitin ligase complex (GO:0031461);; Molecular Function: ubiquitin protein ligase binding (GO:0031625);; Biological Process: protein ubiquitination involved in ubiquitin-dependent protein catabolic process (GO:0042787);; Molecular Function: ubiquitin protein ligase activity (GO:0061630);;	K03347|1.9303e-79|pda:103707291|K03347 cullin 1 | (RefSeq) cullin-1-like	ko04120:Ubiquitin mediated proteolysis;ko04141:Protein processing in endoplasmic reticulum	[D]	Cell cycle control, cell division, chromosome partitioning	Cullin family;; Cullin protein neddylation domain	Cullin-2 GN=CUL2 OS=Arabidopsis thaliana (Mouse-ear cress) PE=1 SV=1	O	Posttranslational modification, protein turnover, chaperones	PREDICTED: cullin-1-like [Nelumbo nucifera]
F01_transcript/19110	[J]	Translation, ribosomal structure and biogenesis	Molecular Function: nucleotide binding (GO:0000166);; Biological Process: spliceosomal complex assembly (GO:0000245);; Molecular Function: RNA binding (GO:0003723);; Cellular Component: Cajal body (GO:0015030);;	K13161|0|vvi:100241942|K13161 heterogeneous nuclear ribonucleoprotein R | (RefSeq) heterogeneous nuclear ribonucleoprotein R	--	[A]	RNA processing and modification	RNA recognition motif. (a.k.a. RRM, RBD, or RNP domain);; Occluded RNA-recognition motif;; RNA recognition motif;; BRCA1-associated protein 2	Polyadenylate-binding protein 2 GN=PAB2 OS=Arabidopsis thaliana (Mouse-ear cress) PE=1 SV=1	S	Function unknown	PREDICTED: heterogeneous nuclear ribonucleoprotein Q [Sesamum indicum]
F01_transcript/26500	--	--	Cellular Component: mitochondrial outer membrane (GO:0005741);; Molecular Function: voltage-gated anion channel activity (GO:0008308);; Molecular Function: porin activity (GO:0015288);; Cellular Component: pore complex (GO:0046930);; Biological Process: regulation of anion transmembrane transport (GO:1903959);;	--	--	[P]	Inorganic ion transport and metabolism	Eukaryotic porin	Mitochondrial outer membrane protein porin of 34 kDa OS=Solanum tuberosum (Potato) PE=1 SV=2	U	Intracellular trafficking, secretion, and vesicular transport	PREDICTED: mitochondrial outer membrane protein porin of 34 kDa-like [Cucumis sativus]
F01_transcript/25225	--	--	Cellular Component: integral component of membrane (GO:0016021);; Molecular Function: heat shock protein binding (GO:0031072);; Molecular Function: unfolded protein binding (GO:0051082);;	--	--	--	--	--	--	S	Function unknown	PREDICTED: uncharacterized protein LOC104589446 [Nelumbo nucifera]
F01_transcript/27226	[J]	Translation, ribosomal structure and biogenesis	Molecular Function: nucleotide binding (GO:0000166);; Molecular Function: RNA binding (GO:0003723);; Cellular Component: integral component of membrane (GO:0016021);;	--	--	[R]	General function prediction only	RNA recognition motif. (a.k.a. RRM, RBD, or RNP domain)	Glycine-rich RNA-binding protein OS=Daucus carota (Wild carrot) PE=2 SV=1	S	Function unknown	Chain A, Solution Structure Of The Nt. Gr-rbp1 Rrm Domain
F01_transcript/28662	--	--	--	--	--	--	--	--	Major allergen Pyr c 1 GN=PYRC1 OS=Pyrus communis (Pear) PE=1 SV=1	S	Function unknown	bet v 1 related allergen [Actinidia chinensis]
F01_transcript/7420	[O]	Posttranslational modification, protein turnover, chaperones	--	--	--	[O]	Posttranslational modification, protein turnover, chaperones	X-domain of DnaJ-containing;; DnaJ domain	Chaperone protein dnaJ 10 GN=F28O16.7 OS=Arabidopsis thaliana (Mouse-ear cress) PE=2 SV=2	O	Posttranslational modification, protein turnover, chaperones	PREDICTED: chaperone protein dnaJ 10 isoform X2 [Nicotiana tomentosiformis]
F01_transcript/19554	[R]	General function prediction only	Cellular Component: integral component of membrane (GO:0016021);;	--	--	--	--	NHL repeat	--	S	Function unknown	PREDICTED: uncharacterized protein LOC104607906 [Nelumbo nucifera]
F01_transcript/18626	[T]	Signal transduction mechanisms	Molecular Function: calmodulin-dependent protein kinase activity (GO:0004683);; Molecular Function: calcium ion binding (GO:0005509);; Molecular Function: calmodulin binding (GO:0005516);; Molecular Function: ATP binding (GO:0005524);; Cellular Component: nucleus (GO:0005634);; Cellular Component: cytoplasm (GO:0005737);; Cellular Component: plasma membrane (GO:0005886);; Biological Process: absc…	K13412|0|sot:102601318|K13412 calcium-dependent protein kinase [EC:2.7.11.1] | (RefSeq) calcium-dependent protein kinase SK5-like	ko04626:Plant-pathogen interaction	[T]	Signal transduction mechanisms	Protein kinase domain;; EF hand;; EF-hand domain;; Protein tyrosine kinase;; EF-hand domain pair;; EF hand;; EF-hand domain pair;; EF-hand domain;; Cytoskeletal-regulatory complex EF hand;; Secreted protein acidic and rich in cysteine Ca binding region	Calcium-dependent protein kinase SK5 OS=Glycine max (Soybean) PE=1 SV=1	T	Signal transduction mechanisms	PREDICTED: calcium-dependent protein kinase SK5-like [Solanum tuberosum]
F01_transcript/15244	--	--	Biological Process: amino acid transmembrane transport (GO:0003333);; Molecular Function: amino acid transmembrane transporter activity (GO:0015171);; Molecular Function: symporter activity (GO:0015293);; Cellular Component: integral component of membrane (GO:0016021);;	--	--	[E]	Amino acid transport and metabolism	Transmembrane amino acid transporter protein	--	E	Amino acid transport and metabolism	PREDICTED: probable sodium-coupled neutral amino acid transporter 6 [Nicotiana tomentosiformis]
F01_transcript/30799	[C]	Energy production and conversion	Molecular Function: copper ion binding (GO:0005507);; Molecular Function: electron carrier activity (GO:0009055);; Cellular Component: chloroplast thylakoid membrane (GO:0009535);; Cellular Component: integral component of membrane (GO:0016021);; Biological Process: oxidation-reduction process (GO:0055114);;	--	--	--	--	Copper binding proteins, plastocyanin/azurin family	Plastocyanin, chloroplastic (Precursor) GN=PETE OS=Spinacia oleracea (Spinach) PE=1 SV=2	C	Energy production and conversion	Plastocyanin A, chloroplast precursor, putative [Ricinus communis]
F01_transcript/25859	[O]	Posttranslational modification, protein turnover, chaperones	--	K09613|0|vvi:100265887|K09613 COP9 signalosome complex subunit 5 [EC:3.4.-.-] | (RefSeq) COP9 signalosome complex subunit 5b	--	[OT]	--	JAB1/Mov34/MPN/PAD-1 ubiquitin protease	COP9 signalosome complex subunit 5a GN=F3I17.12 OS=Arabidopsis thaliana (Mouse-ear cress) PE=1 SV=1	S	Function unknown	PREDICTED: COP9 signalosome complex subunit 5b-like [Vitis vinifera]
F01_transcript/15200	--	--	Molecular Function: signal recognition particle binding (GO:0005047);; Cellular Component: signal recognition particle, endoplasmic reticulum targeting (GO:0005786);; Biological Process: SRP-dependent cotranslational protein targeting to membrane (GO:0006614);; Molecular Function: 7S RNA binding (GO:0008312);;	K03108|0|sly:101255954|K03108 signal recognition particle subunit SRP72 | (RefSeq) signal recognition particle subunit SRP72	ko03060:Protein export	[U]	Intracellular trafficking, secretion, and vesicular transport	SRP72 RNA-binding domain;; Putative TPR-like repeat;; Tetratricopeptide repeat;; Tetratricopeptide repeat;; Tetratricopeptide repeat;; Anaphase-promoting complex, cyclosome, subunit 3;; Tetratricopeptide repeat;; Tetratricopeptide repeat	--	U	Intracellular trafficking, secretion, and vesicular transport	PREDICTED: signal recognition particle subunit SRP72 [Solanum lycopersicum]
F01_transcript/32982	--	--	Molecular Function: asparagine synthase (glutamine-hydrolyzing) activity (GO:0004066);; Cellular Component: cytosol (GO:0005829);; Biological Process: asparagine biosynthetic process (GO:0006529);; Biological Process: glutamine metabolic process (GO:0006541);; Molecular Function: protein homodimerization activity (GO:0042803);;	--	--	--	--	--	--	S	Function unknown	PREDICTED: stem-specific protein TSJT1 [Solanum lycopersicum]
F01_transcript/3395	[T]	Signal transduction mechanisms	Molecular Function: transmembrane receptor protein serine/threonine kinase activity (GO:0004675);; Molecular Function: ATP binding (GO:0005524);; Cellular Component: plasma membrane (GO:0005886);; Biological Process: protein phosphorylation (GO:0006468);; Biological Process: transmembrane receptor protein serine/threonine kinase signaling pathway (GO:0007178);; Cellular Component: integral compon…	--	--	--	--	Protein kinase domain;; Protein tyrosine kinase;; Leucine rich repeat;; Leucine Rich repeats (2 copies);; Leucine rich repeat N-terminal domain;; Leucine Rich Repeat	Probable receptor protein kinase TMK1 (Precursor) GN=TMK1 OS=Arabidopsis thaliana (Mouse-ear cress) PE=1 SV=1	T	Signal transduction mechanisms	PREDICTED: probable receptor protein kinase TMK1 [Sesamum indicum]
F01_transcript/16813	[J]	Translation, ribosomal structure and biogenesis	Molecular Function: glycine-tRNA ligase activity (GO:0004820);; Molecular Function: ATP binding (GO:0005524);; Cellular Component: cytoplasm (GO:0005737);; Biological Process: glycyl-tRNA aminoacylation (GO:0006426);;	K01880|0|vvi:100257704|K01880 glycyl-tRNA synthetase [EC:6.1.1.14] | (RefSeq) glycine--tRNA ligase, mitochondrial 1	ko00970:Aminoacyl-tRNA biosynthesis	[J]	Translation, ribosomal structure and biogenesis	tRNA synthetase class II core domain (G, H, P, S and T);; Anticodon binding domain	Glycine--tRNA ligase 1, mitochondrial (Precursor) GN=GLYRS-1 OS=Arabidopsis thaliana (Mouse-ear cress) PE=2 SV=1	J	Translation, ribosomal structure and biogenesis	PREDICTED: glycine--tRNA ligase 1, mitochondrial [Vitis vinifera]
F01_transcript/14984	--	--	--	--	--	--	--	--	Senescence-associated carboxylesterase 101 (Precursor) GN=SAG101 OS=Arabidopsis thaliana (Mouse-ear cress) PE=1 SV=1	S	Function unknown	PREDICTED: senescence-associated carboxylesterase 101-like isoform X1 [Nicotiana tomentosiformis]
F01_transcript/15281	--	--	Biological Process: protein polyubiquitination (GO:0000209);; Cellular Component: Hrd1p ubiquitin ligase complex (GO:0000836);; Molecular Function: zinc ion binding (GO:0008270);; Cellular Component: integral component of membrane (GO:0016021);; Molecular Function: ligase activity (GO:0016874);; Biological Process: ubiquitin-dependent ERAD pathway (GO:0030433);; Biological Process: endoplasmic re…	K10601|0|tcc:TCM_041140|K10601 E3 ubiquitin-protein ligase synoviolin [EC:2.3.2.27] | (RefSeq) RING/U-box superfamily protein	ko04120:Ubiquitin mediated proteolysis;ko04141:Protein processing in endoplasmic reticulum	[O]	Posttranslational modification, protein turnover, chaperones	Ring finger domain;; RING-H2 zinc finger domain;; Zinc finger, C3HC4 type (RING finger);; RING-type zinc-finger;; Zinc finger, C3HC4 type (RING finger)	ERAD-associated E3 ubiquitin-protein ligase HRD1A {ECO:0000305} OS=Arabidopsis thaliana (Mouse-ear cress) PE=2 SV=1	O	Posttranslational modification, protein turnover, chaperones	RING/U-box superfamily protein [Theobroma cacao]
F01_transcript/29810	--	--	Cellular Component: membrane (GO:0016020);;	--	--	--	--	Plastocyanin-like domain	Uclacyanin-2 (Precursor) GN=At2g44790 OS=Arabidopsis thaliana (Mouse-ear cress) PE=1 SV=1	S	Function unknown	hypothetical protein JCGZ_03951 [Jatropha curcas]
F01_transcript/15231	--	--	Molecular Function: aspartic-type endopeptidase activity (GO:0004190);; Biological Process: proteolysis (GO:0006508);; Cellular Component: membrane (GO:0016020);; Biological Process: protein catabolic process (GO:0030163);;	--	--	[O]	Posttranslational modification, protein turnover, chaperones	Xylanase inhibitor N-terminal;; Eukaryotic aspartyl protease;; Xylanase inhibitor C-terminal	Aspartic proteinase Asp1 (Precursor) GN=OsJ_031884 OS=Oryza sativa subsp. japonica (Rice) PE=2 SV=1	O	Posttranslational modification, protein turnover, chaperones	PREDICTED: aspartic proteinase Asp1 [Vitis vinifera]
F01_transcript/1937	--	--	--	--	--	[R]	General function prediction only	Leucine rich repeat N-terminal domain;; Leucine Rich Repeat	Receptor-like protein 12 (Precursor) GN=RLP12 OS=Arabidopsis thaliana (Mouse-ear cress) PE=2 SV=2	S	Function unknown	PREDICTED: receptor-like protein 12 isoform X1 [Prunus mume]
F01_transcript/19726	[T]	Signal transduction mechanisms	Biological Process: developmental process involved in reproduction (GO:0003006);; Molecular Function: protein serine/threonine kinase activity (GO:0004674);; Molecular Function: ATP binding (GO:0005524);; Cellular Component: nucleus (GO:0005634);; Cellular Component: cytoplasm (GO:0005737);; Biological Process: protein phosphorylation (GO:0006468);; Biological Process: detection of nutrient (GO:0…	K07198|0|pper:PRUPE_ppa004347mg|K07198 5'-AMP-activated protein kinase, catalytic alpha subunit [EC:2.7.11.11] | (RefSeq) hypothetical protein	ko04140:Regulation of autophagy	[T]	Signal transduction mechanisms	Protein kinase domain;; Protein tyrosine kinase;; Kinase associated domain 1;; Kinase-like;; Adenylate sensor of SNF1-like protein kinase;; UBA/TS-N domain;; RIO1 family	SNF1-related protein kinase catalytic subunit alpha KIN10 GN=At3g01090 OS=Arabidopsis thaliana (Mouse-ear cress) PE=1 SV=2	T	Signal transduction mechanisms	sucrose non-fermenting kinase [Actinidia arguta]
F01_transcript/19391	--	--	Molecular Function: GTPase activator activity (GO:0005096);; Biological Process: positive regulation of GTPase activity (GO:0043547);;	K12486|0|sly:101266053|K12486 stromal membrane-associated protein | (RefSeq) probable ADP-ribosylation factor GTPase-activating protein AGD11	ko04144:Endocytosis	[R]	General function prediction only	Putative GTPase activating protein for Arf;; C2 domain	Probable ADP-ribosylation factor GTPase-activating protein AGD11 GN=AGD11 OS=Arabidopsis thaliana (Mouse-ear cress) PE=2 SV=1	U	Intracellular trafficking, secretion, and vesicular transport	PREDICTED: probable ADP-ribosylation factor GTPase-activating protein AGD11 [Nicotiana tomentosiformis]
F01_transcript/16371	[R]	General function prediction only	Molecular Function: phosphodiesterase I activity (GO:0004528);; Cellular Component: vacuole (GO:0005773);; Cellular Component: integral component of membrane (GO:0016021);; Biological Process: nucleic acid phosphodiester bond hydrolysis (GO:0090305);;	--	--	[R]	General function prediction only	Type I phosphodiesterase / nucleotide pyrophosphatase;; Sulfatase	--	S	Function unknown	PREDICTED: ectonucleotide pyrophosphatase/phosphodiesterase family member 3 [Vitis vinifera]
F01_transcript/7075	[V]	Defense mechanisms	Cellular Component: nucleus (GO:0005634);; Cellular Component: chromosome (GO:0005694);; Molecular Function: zinc ion binding (GO:0008270);; Molecular Function: histone-lysine N-methyltransferase activity (GO:0018024);; Biological Process: histone lysine methylation (GO:0034968);; Molecular Function: histone binding (GO:0042393);;	K11420|0|tcc:TCM_021034|K11420 euchromatic histone-lysine N-methyltransferase [EC:2.1.1.43] | (RefSeq) SU(VAR)3-9, putative isoform 1	ko00310:Lysine degradation	[BK]	--	SAD/SRA domain;; Pre-SET motif;; SET domain	Histone-lysine N-methyltransferase family member SUVH9 GN=T6G15.10 OS=Arabidopsis thaliana (Mouse-ear cress) PE=1 SV=1	S	Function unknown	PREDICTED: histone-lysine N-methyltransferase family member SUVH9 [Sesamum indicum]
F01_transcript/1118	--	--	Molecular Function: nuclear export signal receptor activity (GO:0005049);; Cellular Component: nuclear pore (GO:0005643);; Cellular Component: cytoplasm (GO:0005737);; Biological Process: protein export from nucleus (GO:0006611);; Molecular Function: Ran GTPase binding (GO:0008536);;	K18460|0|vvi:100254054|K18460 exportin-7 | (RefSeq) exportin-7	--	[YU]	--	Importin-beta N-terminal domain	--	U	Intracellular trafficking, secretion, and vesicular transport	PREDICTED: exportin-7 isoform X2 [Nelumbo nucifera]
F01_transcript/1509	--	--	--	--	--	[R]	General function prediction only	--	Auxilin-related protein 2 GN=At4g12770 OS=Arabidopsis thaliana (Mouse-ear cress) PE=1 SV=1	S	Function unknown	PREDICTED: auxilin-related protein 1-like [Solanum tuberosum]
F01_transcript/18615	--	--	Molecular Function: translation initiation factor activity (GO:0003743);; Cellular Component: nucleus (GO:0005634);; Biological Process: DNA-templated transcription, initiation (GO:0006352);; Biological Process: translational initiation (GO:0006413);; Molecular Function: protein heterodimerization activity (GO:0046982);; Biological Process: regulation of sequence-specific DNA binding transcriptio…	K03131|0|vvi:100265835|K03131 transcription initiation factor TFIID subunit 6 | (RefSeq) transcription initiation factor TFIID subunit 6	ko03022:Basal transcription factors	[K]	Transcription	TAF6 C-terminal HEAT repeat domain;; TATA box binding protein associated factor (TAF);; Core histone H2A/H2B/H3/H4	Transcription initiation factor TFIID subunit 6 GN=F13M7.6 OS=Arabidopsis thaliana (Mouse-ear cress) PE=1 SV=1	K	Transcription	PREDICTED: transcription initiation factor TFIID subunit 6 isoform X1 [Nelumbo nucifera]
F01_transcript/1218	--	--	Molecular Function: nuclear export signal receptor activity (GO:0005049);; Cellular Component: nuclear pore (GO:0005643);; Cellular Component: cytoplasm (GO:0005737);; Biological Process: protein export from nucleus (GO:0006611);; Molecular Function: Ran GTPase binding (GO:0008536);;	K18460|0|vvi:100254054|K18460 exportin-7 | (RefSeq) exportin-7	--	[YU]	--	Importin-beta N-terminal domain	--	U	Intracellular trafficking, secretion, and vesicular transport	PREDICTED: exportin-7 isoform X2 [Nelumbo nucifera]
F01_transcript/1174	--	--	Cellular Component: membrane (GO:0016020);;	K17925|0|pmum:103327935|K17925 sorting nexin-13 | (RefSeq) uncharacterized LOC103327935	--	[ZUD]	--	PXA domain;; Sorting nexin C terminal;; PX domain	--	S	Function unknown	PREDICTED: uncharacterized protein LOC100243006 [Vitis vinifera]
F01_transcript/24717	--	--	Molecular Function: nucleotide binding (GO:0000166);; Biological Process: mRNA splicing, via spliceosome (GO:0000398);; Molecular Function: RNA binding (GO:0003723);; Molecular Function: metal ion binding (GO:0046872);; Cellular Component: U2AF (GO:0089701);;	K12836|3.02837e-117|tcc:TCM_041518|K12836 splicing factor U2AF 35 kDa subunit | (RefSeq) Zinc finger C-x8-C-x5-C-x3-H type family protein isoform 1	ko03040:Spliceosome	[A]	RNA processing and modification	Zinc finger C-x8-C-x5-C-x3-H type (and similar);; RNA recognition motif. (a.k.a. RRM, RBD, or RNP domain)	Splicing factor U2af small subunit A GN=OsJ_028686 OS=Oryza sativa subsp. japonica (Rice) PE=2 SV=1	S	Function unknown	Zinc finger C-x8-C-x5-C-x3-H type family protein isoform 1 [Theobroma cacao]
F01_transcript/20879	[G]	Carbohydrate transport and metabolism	Cellular Component: plasma membrane (GO:0005886);; Biological Process: carbohydrate transport (GO:0008643);; Cellular Component: integral component of membrane (GO:0016021);; Molecular Function: substrate-specific transmembrane transporter activity (GO:0022891);; Molecular Function: 2-alkenal reductase [NAD(P)] activity (GO:0032440);; Biological Process: transmembrane transport (GO:0055085);; Bio…	--	--	[R]	General function prediction only	Sugar (and other) transporter;; Major Facilitator Superfamily	Sugar transport protein 14 GN=STP14 OS=Arabidopsis thaliana (Mouse-ear cress) PE=2 SV=2	G	Carbohydrate transport and metabolism	hypothetical protein PRUPE_ppa004344mg [Prunus persica]
F01_transcript/3950	--	--	--	--	--	[D]	Cell cycle control, cell division, chromosome partitioning	--	DNA mismatch repair protein MSH6 GN=T10M13.8 OS=Arabidopsis thaliana (Mouse-ear cress) PE=1 SV=2	S	Function unknown	hypothetical protein CICLE_v10007391mg [Citrus clementina]
F01_transcript/14302	--	--	Molecular Function: endopeptidase activity (GO:0004175);; Cellular Component: nucleus (GO:0005634);; Biological Process: protein desumoylation (GO:0016926);; Molecular Function: SUMO-specific protease activity (GO:0016929);;	K08592|0|vvi:100247642|K08592 sentrin-specific protease 1 [EC:3.4.22.68] | (RefSeq) ubiquitin-like-specific protease ESD4	--	[O]	Posttranslational modification, protein turnover, chaperones	Ulp1 protease family, C-terminal catalytic domain	Ubiquitin-like-specific protease ESD4 GN=ESD4 OS=Arabidopsis thaliana (Mouse-ear cress) PE=1 SV=1	O	Posttranslational modification, protein turnover, chaperones	PREDICTED: ubiquitin-like-specific protease ESD4 isoform X1 [Vitis vinifera]
F01_transcript/23122	--	--	Molecular Function: nutrient reservoir activity (GO:0045735);;	--	--	--	--	Cupin	Legumin A basic chain (Precursor) GN=LEGA OS=Gossypium hirsutum (Upland cotton) PE=2 SV=2	S	Function unknown	11S globulin-like protein [Actinidia chinensis]
F01_transcript/18623	--	--	Molecular Function: aspartic-type endopeptidase activity (GO:0004190);; Biological Process: proteolysis (GO:0006508);; Biological Process: lipid metabolic process (GO:0006629);;	K08245|0|pda:103712706|K08245 phytepsin [EC:3.4.23.40] | (RefSeq) aspartic proteinase oryzasin-1-like	--	[O]	Posttranslational modification, protein turnover, chaperones	Eukaryotic aspartyl protease;; Xylanase inhibitor N-terminal;; Eukaryotic aspartyl protease;; Saposin-like type B, region 1;; Saposin-like type B, region 2	Aspartic proteinase (Precursor) OS=Cucurbita pepo (Vegetable marrow) PE=2 SV=1	O	Posttranslational modification, protein turnover, chaperones	PREDICTED: aspartic proteinase oryzasin-1-like [Phoenix dactylifera]
F01_transcript/16234	--	--	Molecular Function: DNA-directed 5'-3' RNA polymerase activity (GO:0003899);; Cellular Component: mitochondrion (GO:0005739);; Cellular Component: vacuolar membrane (GO:0005774);; Cellular Component: endoplasmic reticulum membrane (GO:0005789);; Cellular Component: Golgi apparatus (GO:0005794);; Cellular Component: plasma membrane (GO:0005886);; Biological Process: transcription, DNA-templated (G…	--	--	[E]	Amino acid transport and metabolism	--	--	S	Function unknown	hypothetical protein POPTR_0009s16200g [Populus trichocarpa]
F01_transcript/20742	[G]	Carbohydrate transport and metabolism	Molecular Function: nucleotide binding (GO:0000166);; Molecular Function: nucleic acid binding (GO:0003676);; Molecular Function: transporter activity (GO:0005215);; Cellular Component: integral component of membrane (GO:0016021);; Biological Process: transmembrane transport (GO:0055085);;	--	--	[R]	General function prediction only	Major Facilitator Superfamily	--	G	Carbohydrate transport and metabolism	PREDICTED: hippocampus abundant transcript-like protein 1 [Eucalyptus grandis]
F01_transcript/32188	--	--	Cellular Component: mitochondrion (GO:0005739);;	--	--	--	--	--	--	S	Function unknown	PREDICTED: uncharacterized protein LOC105177526 [Sesamum indicum]
F01_transcript/2915	--	--	Molecular Function: organic cyclic compound binding (GO:0097159);; Molecular Function: heterocyclic compound binding (GO:1901363);;	K13459|2.01935e-55|pop:POPTR_0011s12470g|K13459 disease resistance protein RPS2 | (RefSeq) POPTRDRAFT_568952; hypothetical protein	ko04626:Plant-pathogen interaction	[T]	Signal transduction mechanisms	NB-ARC domain;; Leucine Rich Repeat	Putative disease resistance protein At4g10780 GN=At4g10780 OS=Arabidopsis thaliana (Mouse-ear cress) PE=3 SV=1	S	Function unknown	Disease resistance protein [Morus notabilis]
F01_transcript/31335	[J]	Translation, ribosomal structure and biogenesis	Molecular Function: structural constituent of ribosome (GO:0003735);; Biological Process: translation (GO:0006412);; Cellular Component: cytosolic large ribosomal subunit (GO:0022625);;	K02889|8.44104e-92|pda:103706959|K02889 large subunit ribosomal protein L21e | (RefSeq) 60S ribosomal protein L21-2-like	ko03010:Ribosome	[J]	Translation, ribosomal structure and biogenesis	Ribosomal protein L21e	60S ribosomal protein L21-2 GN=RPL21F OS=Arabidopsis thaliana (Mouse-ear cress) PE=2 SV=1	J	Translation, ribosomal structure and biogenesis	PREDICTED: LOW QUALITY PROTEIN: 60S ribosomal protein L21-2-like [Phoenix dactylifera]
F01_transcript/7137	--	--	--	--	--	--	--	--	--	S	Function unknown	PREDICTED: uncharacterized protein LOC100243848 isoform X1 [Vitis vinifera]
F01_transcript/28205	[R]	General function prediction only	Molecular Function: GTP binding (GO:0005525);; Cellular Component: intracellular (GO:0005622);; Biological Process: small GTPase mediated signal transduction (GO:0007264);;	K07889|6.99601e-139|gmx:100810011|K07889 Ras-related protein Rab-5C | (RefSeq) ras-related protein RHN1	ko04144:Endocytosis;ko04145:Phagosome	[U]	Intracellular trafficking, secretion, and vesicular transport	Ras family;; Ras of Complex, Roc, domain of DAPkinase;; ADP-ribosylation factor family;; Gtr1/RagA G protein conserved region;; 50S ribosome-binding GTPase	Ras-related protein RHN1 GN=RHN1 OS=Nicotiana plumbaginifolia (Leadwort-leaved tobacco) PE=2 SV=1	S	Function unknown	PREDICTED: ras-related protein RHN1 isoform X1 [Glycine max]
F01_transcript/11030	[O]	Posttranslational modification, protein turnover, chaperones	Molecular Function: serine-type endopeptidase activity (GO:0004252);; Cellular Component: cell wall (GO:0005618);; Biological Process: proteolysis (GO:0006508);;	--	--	--	--	Subtilase family;; Peptidase inhibitor I9;; PA domain	Subtilisin-like protease SBT3.3 {ECO:0000303|PubMed:16193095} (Precursor) OS=Arabidopsis thaliana (Mouse-ear cress) PE=2 SV=1	O	Posttranslational modification, protein turnover, chaperones	PREDICTED: LOW QUALITY PROTEIN: subtilisin-like protease SBT3.5 [Vitis vinifera]
F01_transcript/19383	--	--	Molecular Function: actin binding (GO:0003779);;	--	--	--	--	Fused Ig-PH domain of plant-specific actin-binding protein;; Coiled-coil regions of plant-specific actin-binding protein	--	S	Function unknown	PREDICTED: uncharacterized protein LOC100267048 [Vitis vinifera]
F01_transcript/19393	[H]	Coenzyme transport and metabolism	Biological Process: porphyrin-containing compound biosynthetic process (GO:0006779);; Molecular Function: transaminase activity (GO:0008483);; Cellular Component: chloroplast (GO:0009507);; Cellular Component: integral component of membrane (GO:0016021);; Molecular Function: pyridoxal phosphate binding (GO:0030170);; Molecular Function: glutamate-1-semialdehyde 2,1-aminomutase activity (GO:004228…	K01845|0|cit:102627733|K01845 glutamate-1-semialdehyde 2,1-aminomutase [EC:5.4.3.8] | (RefSeq) glutamate-1-semialdehyde 2,1-aminomutase 2, chloroplastic	ko00860:Porphyrin and chlorophyll metabolism	[E]	Amino acid transport and metabolism	Aminotransferase class-III	Glutamate-1-semialdehyde 2,1-aminomutase 2, chloroplastic (Precursor) GN=T8P19.240 OS=Arabidopsis thaliana (Mouse-ear cress) PE=2 SV=2	H	Coenzyme transport and metabolism	Glutamate-1-semialdehyde 2,1-aminomutase 2, chloroplastic -like protein [Gossypium arboreum]
F01_transcript/20650	[L]	Replication, recombination and repair	Molecular Function: nucleic acid binding (GO:0003676);;	--	--	--	--	Exonuclease	Protein NEN1 {ECO:0000303|PubMed:25081480} OS=Arabidopsis thaliana (Mouse-ear cress) PE=2 SV=1	S	Function unknown	unnamed protein product [Coffea canephora]
F01_transcript/3455	[O]	Posttranslational modification, protein turnover, chaperones	Molecular Function: metalloendopeptidase activity (GO:0004222);; Cellular Component: mitochondrion (GO:0005739);; Molecular Function: zinc ion binding (GO:0008270);; Biological Process: protein processing (GO:0016485);; Biological Process: peptide catabolic process (GO:0043171);; Biological Process: proteolysis involved in cellular protein catabolic process (GO:0051603);;	K01408|0|tcc:TCM_024646|K01408 insulysin [EC:3.4.24.56] | (RefSeq) Insulinase (Peptidase family M16) family protein isoform 1	--	[O]	Posttranslational modification, protein turnover, chaperones	Middle or third domain of peptidase_M16;; Peptidase M16 inactive domain;; Insulinase (Peptidase family M16)	Zinc-metallopeptidase, peroxisomal GN=PXM16 OS=Arabidopsis thaliana (Mouse-ear cress) PE=2 SV=1	O	Posttranslational modification, protein turnover, chaperones	Insulinase (Peptidase family M16) family protein isoform 1 [Theobroma cacao]
F01_transcript/27872	--	--	Molecular Function: RNA binding (GO:0003723);;	--	--	[A]	RNA processing and modification	KH domain	KH domain-containing protein At2g38610 GN=At2g38610 OS=Arabidopsis thaliana (Mouse-ear cress) PE=1 SV=1	A	RNA processing and modification	PREDICTED: KH domain-containing protein At2g38610 [Nelumbo nucifera]
F01_transcript/5493	--	--	--	--	--	--	--	MULE transposase domain;; FAR1 DNA-binding domain;; COMM domain;; SWIM zinc finger	Protein FAR1-RELATED SEQUENCE 3 GN=FRS3 OS=Arabidopsis thaliana (Mouse-ear cress) PE=2 SV=2	S	Function unknown	PREDICTED: protein FAR1-RELATED SEQUENCE 3-like [Vitis vinifera]
F01_transcript/27114	[F]	Nucleotide transport and metabolism	Molecular Function: adenine phosphoribosyltransferase activity (GO:0003999);; Cellular Component: cytoplasm (GO:0005737);; Biological Process: adenine salvage (GO:0006168);; Biological Process: nucleoside metabolic process (GO:0009116);;	K00759|6.55818e-120|pper:PRUPE_ppa011918mg|K00759 adenine phosphoribosyltransferase [EC:2.4.2.7] | (RefSeq) hypothetical protein	ko00230:Purine metabolism	[F]	Nucleotide transport and metabolism	Phosphoribosyl transferase domain	Adenine phosphoribosyltransferase 5 GN=APT5 OS=Arabidopsis thaliana (Mouse-ear cress) PE=1 SV=1	F	Nucleotide transport and metabolism	PREDICTED: adenine phosphoribosyltransferase 5 [Populus euphratica]
F01_transcript/10764	--	--	Cellular Component: integral component of membrane (GO:0016021);;	--	--	--	--	--	--	S	Function unknown	hypothetical protein SEPMUDRAFT_126015 [Sphaerulina musiva SO2202]
F01_transcript/2964	[O]	Posttranslational modification, protein turnover, chaperones	Biological Process: protein O-linked glycosylation (GO:0006493);; Molecular Function: transferase activity, transferring glycosyl groups (GO:0016757);;	K09667|0|sot:102597898|K09667 protein O-GlcNAc transferase [EC:2.4.1.255] | (RefSeq) probable UDP-N-acetylglucosamine--peptide N-acetylglucosaminyltransferase SEC	ko00514:Other types of O-glycan biosynthesis	[GOT]	--	Glycosyl transferase family 41;; Tetratricopeptide repeat;; TPR repeat;; Tetratricopeptide repeat;; Tetratricopeptide repeat;; Tetratricopeptide repeat;; Tetratricopeptide repeat;; Tetratricopeptide repeat;; Tetratricopeptide repeat;; Tetratricopeptide repeat;; Tetratricopeptide repeat;; Tetratricopeptide repeat;; Tetratricopeptide repeat;; Tetratricopeptide repeat;; NMDA receptor-regulated prote…	Probable UDP-N-acetylglucosamine--peptide N-acetylglucosaminyltransferase SEC GN=SEC OS=Arabidopsis thaliana (Mouse-ear cress) PE=2 SV=1	O	Posttranslational modification, protein turnover, chaperones	PREDICTED: probable UDP-N-acetylglucosamine--peptide N-acetylglucosaminyltransferase SEC [Sesamum indicum]
F01_transcript/11681	--	--	Cellular Component: integral component of membrane (GO:0016021);; Biological Process: transmembrane transport (GO:0055085);;	--	--	[S]	Function unknown	Membrane transport protein	--	S	Function unknown	auxin:hydrogen symporter, putative [Ricinus communis]
F01_transcript/15287	[O]	Posttranslational modification, protein turnover, chaperones	Biological Process: protein peptidyl-prolyl isomerization (GO:0000413);; Molecular Function: peptidyl-prolyl cis-trans isomerase activity (GO:0003755);; Molecular Function: FK506 binding (GO:0005528);; Cellular Component: nucleus (GO:0005634);; Cellular Component: endoplasmic reticulum membrane (GO:0005789);; Cellular Component: cytosol (GO:0005829);; Biological Process: response to osmotic stres…	K09571|0|vvi:100266654|K09571 FK506-binding protein 4/5 [EC:5.2.1.8] | (RefSeq) peptidyl-prolyl cis-trans isomerase FKBP62	--	[O]	Posttranslational modification, protein turnover, chaperones	FKBP-type peptidyl-prolyl cis-trans isomerase;; Tetratricopeptide repeat;; Tetratricopeptide repeat;; Tetratricopeptide repeat;; Tetratricopeptide repeat	Peptidyl-prolyl cis-trans isomerase FKBP62 GN=MJL12.19 OS=Arabidopsis thaliana (Mouse-ear cress) PE=1 SV=2	O	Posttranslational modification, protein turnover, chaperones	PREDICTED: peptidyl-prolyl cis-trans isomerase FKBP62 isoform X1 [Vitis vinifera]
F01_transcript/24528	[J]	Translation, ribosomal structure and biogenesis	Molecular Function: translation initiation factor activity (GO:0003743);; Biological Process: translational initiation (GO:0006413);;	K03238|8.70798e-139|vvi:100263785|K03238 translation initiation factor 2 subunit 2 | (RefSeq) eukaryotic translation initiation factor 2 subunit beta	ko03013:RNA transport	[J]	Translation, ribosomal structure and biogenesis	Domain found in IF2B/IF5	Eukaryotic translation initiation factor 2 subunit beta OS=Triticum aestivum (Wheat) PE=1 SV=1	J	Translation, ribosomal structure and biogenesis	PREDICTED: eukaryotic translation initiation factor 2 subunit beta isoform X1 [Nelumbo nucifera]
F01_transcript/21397	--	--	--	--	--	[R]	General function prediction only	Zinc finger, C2H2 type;; Zinc-finger double-stranded RNA-binding	Zinc finger protein MAGPIE {ECO:0000303|PubMed:17785527} OS=Arabidopsis thaliana (Mouse-ear cress) PE=1 SV=1	S	Function unknown	unnamed protein product [Coffea canephora]
F01_transcript/33356	--	--	--	--	--	--	--	ATP synthase E chain	--	--	--	PREDICTED: uncharacterized protein LOC105134496 [Populus euphratica]
F01_transcript/11995	[Q]	Secondary metabolites biosynthesis, transport and catabolism	Biological Process: fatty acid alpha-oxidation (GO:0001561);; Molecular Function: peroxidase activity (GO:0004601);; Biological Process: response to oxidative stress (GO:0006979);; Biological Process: systemic acquired resistance (GO:0009627);; Biological Process: response to abscisic acid (GO:0009737);; Cellular Component: monolayer-surrounded lipid storage body (GO:0012511);; Molecular Function…	K10529|0|vvi:100254380|K10529 alpha-dioxygenase [EC:1.-.-.-] | (RefSeq) alpha-dioxygenase 1	ko00592:alpha-Linolenic acid metabolism	[R]	General function prediction only	Animal haem peroxidase	Alpha-dioxygenase 1 (Precursor) GN=T13O15.6 OS=Arabidopsis thaliana (Mouse-ear cress) PE=1 SV=1	S	Function unknown	unnamed protein product [Vitis vinifera]
F01_transcript/24919	[J]	Translation, ribosomal structure and biogenesis	Molecular Function: nucleotide binding (GO:0000166);; Molecular Function: double-stranded DNA binding (GO:0003690);; Cellular Component: mitochondrion (GO:0005739);; Biological Process: regulation of transcription, DNA-templated (GO:0006355);; Cellular Component: viral nucleocapsid (GO:0019013);; Cellular Component: intracellular ribonucleoprotein complex (GO:0030529);;	K12741|4.49307e-171|vvi:100243489|K12741 heterogeneous nuclear ribonucleoprotein A1/A3 | (RefSeq) UBP1-associated protein 2A	ko03040:Spliceosome	[R]	General function prediction only	RNA recognition motif. (a.k.a. RRM, RBD, or RNP domain);; RNA recognition motif;; Nup53/35/40-type RNA recognition motif	UBP1-associated protein 2C GN=UBA2C OS=Arabidopsis thaliana (Mouse-ear cress) PE=2 SV=1	S	Function unknown	PREDICTED: UBP1-associated protein 2C-like isoform X1 [Vitis vinifera]
F01_transcript/6836	[S]	Function unknown	Molecular Function: ATP binding (GO:0005524);; Molecular Function: 1-phosphatidylinositol-4-phosphate 5-kinase activity (GO:0016308);; Biological Process: phosphatidylinositol phosphorylation (GO:0046854);;	K00889|0|vvi:100250604|K00889 1-phosphatidylinositol-4-phosphate 5-kinase [EC:2.7.1.68] | (RefSeq) phosphatidylinositol 4-phosphate 5-kinase 1	ko00562:Inositol phosphate metabolism;ko04070:Phosphatidylinositol signaling system;ko04144:Endocytosis	[T]	Signal transduction mechanisms	Phosphatidylinositol-4-phosphate 5-Kinase;; MORN repeat	Phosphatidylinositol 4-phosphate 5-kinase 1 GN=F2E2.1 OS=Arabidopsis thaliana (Mouse-ear cress) PE=1 SV=1	T	Signal transduction mechanisms	unnamed protein product [Vitis vinifera]
F01_transcript/24254	[E]	Amino acid transport and metabolism	Molecular Function: diaminopimelate epimerase activity (GO:0008837);; Biological Process: lysine biosynthetic process via diaminopimelate (GO:0009089);; Cellular Component: chloroplast stroma (GO:0009570);;	K01778|0|vvi:100241380|K01778 diaminopimelate epimerase [EC:5.1.1.7] | (RefSeq) diaminopimelate epimerase, chloroplastic	ko00300:Lysine biosynthesis;ko01230:Biosynthesis of amino acids	--	--	Diaminopimelate epimerase	Diaminopimelate epimerase, chloroplastic (Precursor) GN=DAPF OS=Arabidopsis thaliana (Mouse-ear cress) PE=1 SV=1	E	Amino acid transport and metabolism	PREDICTED: diaminopimelate epimerase, chloroplastic [Vitis vinifera]
F01_transcript/2540	--	--	--	--	--	[ODR]	--	PB1 domain;; Tetratricopeptide repeat;; TPR repeat;; Tetratricopeptide repeat	TPR repeat-containing thioredoxin TTL4 GN=TTL4 OS=Arabidopsis thaliana (Mouse-ear cress) PE=2 SV=1	S	Function unknown	PREDICTED: LOW QUALITY PROTEIN: uncharacterized protein LOC103487400 [Cucumis melo]
F01_transcript/21442	[QV]	--	Molecular Function: iron ion binding (GO:0005506);; Cellular Component: integral component of membrane (GO:0016021);; Molecular Function: heme binding (GO:0020037);; Biological Process: secondary metabolite biosynthetic process (GO:0044550);; Molecular Function: N-methylcoclaurine 3'-monooxygenase activity (GO:0050593);; Biological Process: oxidation-reduction process (GO:0055114);;	--	--	[Q]	Secondary metabolites biosynthesis, transport and catabolism	Cytochrome P450	Geraniol 8-hydroxylase GN=CYP76B6 OS=Catharanthus roseus (Madagascar periwinkle) PE=1 SV=1	Q	Secondary metabolites biosynthesis, transport and catabolism	ripening-related P-450 enzyme-like [Vitis vinifera]
F01_transcript/17971	[R]	General function prediction only	Molecular Function: zinc ion binding (GO:0008270);; Cellular Component: integral component of membrane (GO:0016021);; Molecular Function: oxidoreductase activity (GO:0016491);; Molecular Function: protein-cysteine S-palmitoyltransferase activity (GO:0019706);; Biological Process: oxidation-reduction process (GO:0055114);;	K20032|0|tcc:TCM_006369|K20032 palmitoyltransferase ZDHHC13/17 [EC:2.3.1.225] | (RefSeq) Palmitoyltransferase TIP1, putative isoform 1	--	[R]	General function prediction only	DHHC palmitoyltransferase;; Ankyrin repeats (3 copies);; Ankyrin repeats (many copies);; Ankyrin repeats (many copies);; Ankyrin repeat;; Ankyrin repeat	Probable protein S-acyltransferase 23 GN=PAT23 OS=Arabidopsis thaliana (Mouse-ear cress) PE=2 SV=2	S	Function unknown	unnamed protein product [Coffea canephora]
F01_transcript/28290	[J]	Translation, ribosomal structure and biogenesis	Biological Process: maturation of LSU-rRNA (GO:0000470);; Molecular Function: RNA binding (GO:0003723);; Molecular Function: structural constituent of ribosome (GO:0003735);; Biological Process: translation (GO:0006412);; Cellular Component: cytosolic large ribosomal subunit (GO:0022625);;	K02865|7.71866e-134|pda:103724272|K02865 large subunit ribosomal protein L10Ae | (RefSeq) 60S ribosomal protein L10a	ko03010:Ribosome	[J]	Translation, ribosomal structure and biogenesis	Ribosomal protein L1p/L10e family	60S ribosomal protein L10a-1 GN=RPL10AA OS=Arabidopsis thaliana (Mouse-ear cress) PE=2 SV=1	J	Translation, ribosomal structure and biogenesis	PREDICTED: 60S ribosomal protein L10a-2 [Phoenix dactylifera]
F01_transcript/10735	[R]	General function prediction only	Molecular Function: GTP binding (GO:0005525);; Cellular Component: nucleolus (GO:0005730);; Biological Process: ribosome biogenesis (GO:0042254);;	K06943|0|tcc:TCM_025126|K06943 nucleolar GTP-binding protein | (RefSeq) Nucleolar GTP-binding protein	ko03008:Ribosome biogenesis in eukaryotes	[R]	General function prediction only	NOGCT (NUC087) domain;; Nucleolar GTP-binding protein 1 (NOG1);; 50S ribosome-binding GTPase;; Ferrous iron transport protein B	Nucleolar GTP-binding protein 1 GN=At1g50920 OS=Arabidopsis thaliana (Mouse-ear cress) PE=2 SV=1	S	Function unknown	Nucleolar GTP-binding protein [Theobroma cacao]
F01_transcript/16049	--	--	Cellular Component: late endosome membrane (GO:0031902);; Biological Process: multivesicular body assembly (GO:0036258);; Molecular Function: ubiquitin binding (GO:0043130);; Molecular Function: metal ion binding (GO:0046872);; Biological Process: intralumenal vesicle formation (GO:0070676);;	--	--	[R]	General function prediction only	FYVE zinc finger	1-phosphatidylinositol-3-phosphate 5-kinase FAB1B GN=FAB1B OS=Arabidopsis thaliana (Mouse-ear cress) PE=2 SV=1	S	Function unknown	PREDICTED: uncharacterized protein LOC100259195 [Vitis vinifera]
F01_transcript/15485	--	--	--	--	--	--	--	TPL-binding domain in jasmonate signalling	--	S	Function unknown	hypothetical protein JCGZ_18432 [Jatropha curcas]
F01_transcript/10843	[G]	Carbohydrate transport and metabolism	Cellular Component: integral component of membrane (GO:0016021);;	--	--	--	--	Nodulin-like	--	S	Function unknown	conserved hypothetical protein [Ricinus communis]
F01_transcript/5305	[K]	Transcription	Cellular Component: membrane (GO:0016020);; Molecular Function: kinase activity (GO:0016301);; Biological Process: phosphorylation (GO:0016310);;	--	--	--	--	Leucine rich repeat;; Leucine Rich repeats (2 copies);; Leucine Rich Repeat;; Leucine Rich repeat;; Protein tyrosine kinase;; Protein kinase domain;; Protein tyrosine kinase	Probable inactive leucine-rich repeat receptor-like protein kinase At3g03770 (Precursor) GN=At3g03770 OS=Arabidopsis thaliana (Mouse-ear cress) PE=2 SV=1	T	Signal transduction mechanisms	Leucine-rich repeat protein kinase family protein isoform 2 [Theobroma cacao]
F01_transcript/22081	--	--	Cellular Component: integral component of membrane (GO:0016021);;	--	--	--	--	--	--	S	Function unknown	PREDICTED: uncharacterized protein LOC105115534 isoform X2 [Populus euphratica]
F01_transcript/27045	[F]	Nucleotide transport and metabolism	Molecular Function: nucleoside diphosphate kinase activity (GO:0004550);; Molecular Function: ATP binding (GO:0005524);; Cellular Component: nucleus (GO:0005634);; Biological Process: nucleoside diphosphate phosphorylation (GO:0006165);; Biological Process: GTP biosynthetic process (GO:0006183);; Biological Process: UTP biosynthetic process (GO:0006228);; Biological Process: CTP biosynthetic proc…	K00940|1.65653e-99|pper:PRUPE_ppa010872mg|K00940 nucleoside-diphosphate kinase [EC:2.7.4.6] | (RefSeq) hypothetical protein	ko00230:Purine metabolism;ko00240:Pyrimidine metabolism	[F]	Nucleotide transport and metabolism	Nucleoside diphosphate kinase	Nucleoside diphosphate kinase 2 low molecular weight (Precursor) GN=NDPK2 OS=Spinacia oleracea (Spinach) PE=1 SV=1	F	Nucleotide transport and metabolism	hypothetical protein PRUPE_ppa010872mg [Prunus persica]
F01_transcript/21951	--	--	--	K09562|0|sly:101253115|K09562 hsp70-interacting protein | (RefSeq) hsp70-binding protein 1	ko04141:Protein processing in endoplasmic reticulum	[O]	Posttranslational modification, protein turnover, chaperones	Nucleotide exchange factor Fes1;; V-ATPase subunit H;; Armadillo/beta-catenin-like repeat;; HEAT repeat	--	O	Posttranslational modification, protein turnover, chaperones	PREDICTED: uncharacterized protein LOC105122432 isoform X1 [Populus euphratica]
F01_transcript/31954	--	--	Cellular Component: integral component of membrane (GO:0016021);;	--	--	--	--	--	--	S	Function unknown	hypothetical protein MIMGU_mgv1a015970mg [Erythranthe guttata]
F01_transcript/28037	--	--	Molecular Function: protein kinase activity (GO:0004672);; Molecular Function: ATP binding (GO:0005524);; Biological Process: protein phosphorylation (GO:0006468);; Cellular Component: integral component of membrane (GO:0016021);; Molecular Function: carbohydrate binding (GO:0030246);;	--	--	[U]	Intracellular trafficking, secretion, and vesicular transport	Vacuolar import and degradation protein;; Vacuolar import and degradation protein	--	U	Intracellular trafficking, secretion, and vesicular transport	hypothetical protein VITISV_019443 [Vitis vinifera]
F01_transcript/21615	[J]	Translation, ribosomal structure and biogenesis	Cellular Component: membrane (GO:0016020);; Molecular Function: organic cyclic compound binding (GO:0097159);; Molecular Function: heterocyclic compound binding (GO:1901363);;	K12741|7.5388e-95|vvi:100266260|K12741 heterogeneous nuclear ribonucleoprotein A1/A3 | (RefSeq) UBP1-associated protein 2B	ko03040:Spliceosome	[R]	General function prediction only	RNA recognition motif. (a.k.a. RRM, RBD, or RNP domain);; RNA recognition motif	UBP1-associated protein 2B GN=UBA2B OS=Arabidopsis thaliana (Mouse-ear cress) PE=2 SV=1	S	Function unknown	PREDICTED: UBP1-associated protein 2B-like [Vitis vinifera]
F01_transcript/17102	--	--	--	--	--	--	--	--	--	S	Function unknown	PREDICTED: uncharacterized protein LOC100255982 isoform X2 [Vitis vinifera]
F01_transcript/7070	[R]	General function prediction only	Biological Process: maturation of SSU-rRNA from tricistronic rRNA transcript (SSU-rRNA, 5.8S rRNA, LSU-rRNA) (GO:0000462);; Molecular Function: snoRNA binding (GO:0030515);; Cellular Component: small-subunit processome (GO:0032040);; Cellular Component: Pwp2p-containing subcomplex of 90S preribosome (GO:0034388);;	K14556|0|vvi:100250257|K14556 U3 small nucleolar RNA-associated protein 12 | (RefSeq) WDR3; WD repeat-containing protein 3	ko03008:Ribosome biogenesis in eukaryotes	[A]	RNA processing and modification	WD domain, G-beta repeat;; Anaphase-promoting complex subunit 4 WD40 domain;; Nucleoporin Nup120/160;; WD domain, G-beta repeat;; Dip2/Utp12 Family	Dynein assembly factor with WDR repeat domains 1 GN=DAW1 OS=Chlamydomonas reinhardtii (Chlamydomonas smithii) PE=1 SV=1	S	Function unknown	WD repeat-containing 3 [Gossypium arboreum]
F01_transcript/6196	--	--	Cellular Component: Golgi apparatus (GO:0005794);; Biological Process: cytoskeleton organization (GO:0007010);; Biological Process: unidimensional cell growth (GO:0009826);; Biological Process: plant-type cell wall biogenesis (GO:0009832);; Biological Process: phosphatidylinositol-3-phosphate biosynthetic process (GO:0036092);; Molecular Function: phosphatidylinositol-3,5-bisphosphate 5-phosphata…	--	--	[I]	Lipid transport and metabolism	SacI homology domain	Phosphoinositide phosphatase SAC1 OS=Arabidopsis thaliana (Mouse-ear cress) PE=1 SV=1	T	Signal transduction mechanisms	PREDICTED: phosphoinositide phosphatase SAC1 [Vitis vinifera]
F01_transcript/27792	--	--	--	--	--	--	--	--	--	--	--	PREDICTED: uncharacterized protein LOC101294709 [Fragaria vesca subsp. vesca]
F01_transcript/5755	[S]	Function unknown	--	--	--	--	--	Glycine-rich domain-containing protein-like	--	S	Function unknown	PREDICTED: uncharacterized protein LOC100252003 [Vitis vinifera]
F01_transcript/4165	[R]	General function prediction only	--	K03255|0|vvi:100257033|K03255 protein TIF31 | (RefSeq) protein TSS	--	[R]	General function prediction only	Tetratricopeptide repeat;; Tetratricopeptide repeat;; Tetratricopeptide repeat	Clustered mitochondria protein GN=F4F15.250 OS=Arabidopsis thaliana (Mouse-ear cress) PE=2 SV=1	S	Function unknown	PREDICTED: clustered mitochondria protein isoform X4 [Nicotiana tomentosiformis]
F01_transcript/23057	--	--	Molecular Function: metal ion binding (GO:0046872);;	K16277|9.59803e-128|vvi:100241529|K16277 E3 ubiquitin-protein ligase DRIP [EC:2.3.2.27] | (RefSeq) E3 ubiquitin protein ligase DRIP2	--	[S]	Function unknown	--	E3 ubiquitin protein ligase DRIP2 GN=DRIP2 OS=Arabidopsis thaliana (Mouse-ear cress) PE=1 SV=1	S	Function unknown	PREDICTED: E3 ubiquitin protein ligase DRIP2 [Nelumbo nucifera]
F01_transcript/26306	--	--	Cellular Component: endoplasmic reticulum (GO:0005783);;	--	--	[P]	Inorganic ion transport and metabolism	SPX domain;; SPX domain	SPX domain-containing protein 1 GN=SPX1 OS=Arabidopsis thaliana (Mouse-ear cress) PE=2 SV=2	T	Signal transduction mechanisms	PREDICTED: SPX domain-containing protein 1 [Vitis vinifera]
F01_transcript/10459	[J]	Translation, ribosomal structure and biogenesis	Molecular Function: GTPase activity (GO:0003924);; Molecular Function: GTP binding (GO:0005525);;	K03243|4.21802e-153|csl:COCSUDRAFT_25870|K03243 translation initiation factor 5B | (RefSeq) P-loop containing nucleoside triphosphate hydrolase protein	ko03013:RNA transport	[J]	Translation, ribosomal structure and biogenesis	Translation-initiation factor 2;; Elongation factor Tu domain 2	Translation initiation factor IF-2, chloroplastic GN=infB OS=Rhodomonas salina (Cryptomonas salina) PE=3 SV=1	J	Translation, ribosomal structure and biogenesis	hypothetical protein MIMGU_mgv1a000394mg [Erythranthe guttata]
F01_transcript/32323	--	--	Biological Process: autophagy (GO:0006914);; Biological Process: cellular response to nitrogen starvation (GO:0006995);;	K08341|5.31064e-57|sot:102593150|K08341 GABA(A) receptor-associated protein | (RefSeq) autophagy-related protein 8C	ko04140:Regulation of autophagy	[Z]	Cytoskeleton	Autophagy protein Atg8 ubiquitin like	Autophagy-related protein 8C (Precursor) GN=OSJNBa0056O06.5 OS=Oryza sativa subsp. japonica (Rice) PE=2 SV=1	U	Intracellular trafficking, secretion, and vesicular transport	autophagy 8a [Solanum lycopersicum]
F01_transcript/28650	--	--	Cellular Component: nucleus (GO:0005634);; Biological Process: regulation of transcription, DNA-templated (GO:0006355);; Molecular Function: sequence-specific DNA binding (GO:0043565);;	K09338|1.16172e-81|tcc:TCM_000438|K09338 homeobox-leucine zipper protein | (RefSeq) Homeobox protein, putative	--	[K]	Transcription	Homeobox domain;; Homeobox KN domain	Homeobox-leucine zipper protein ATHB-40 GN=ATHB-40 OS=Arabidopsis thaliana (Mouse-ear cress) PE=2 SV=3	K	Transcription	unnamed protein product [Coffea canephora]
F01_transcript/4207	--	--	Molecular Function: calcium ion binding (GO:0005509);; Molecular Function: calcium-dependent phospholipid binding (GO:0005544);; Cellular Component: endoplasmic reticulum (GO:0005783);; Cellular Component: plasma membrane (GO:0005886);; Cellular Component: plasmodesma (GO:0009506);; Cellular Component: integral component of membrane (GO:0016021);; Molecular Function: transferase activity, transfe…	--	--	--	--	Plant phosphoribosyltransferase C-terminal;; C2 domain	C2 and GRAM domain-containing protein At1g03370 GN=At1g03370 OS=Arabidopsis thaliana (Mouse-ear cress) PE=2 SV=4	S	Function unknown	PREDICTED: uncharacterized protein LOC105174198 [Sesamum indicum]
F01_transcript/25827	[R]	General function prediction only	Molecular Function: GTP binding (GO:0005525);; Cellular Component: intracellular (GO:0005622);; Biological Process: vesicle docking involved in exocytosis (GO:0006904);; Biological Process: small GTPase mediated signal transduction (GO:0007264);; Biological Process: protein secretion (GO:0009306);; Molecular Function: hydrolase activity (GO:0016787);;	K07901|1.8324e-122|tcc:TCM_041897|K07901 Ras-related protein Rab-8A | (RefSeq) RAB GTPaseA isoform 2	ko04144:Endocytosis	[TU]	--	Ras family;; Ras of Complex, Roc, domain of DAPkinase;; ADP-ribosylation factor family;; 50S ribosome-binding GTPase;; Gtr1/RagA G protein conserved region	Ras-related protein RABE1c GN=F12M12.30 OS=Arabidopsis thaliana (Mouse-ear cress) PE=1 SV=1	S	Function unknown	unnamed protein product [Coffea canephora]
F01_transcript/17240	--	--	Biological Process: proteolysis (GO:0006508);; Molecular Function: peptidase activity (GO:0008233);; Cellular Component: integral component of membrane (GO:0016021);;	--	--	--	--	--	Uncharacterized membrane protein At1g16860 GN=At1g16860 OS=Arabidopsis thaliana (Mouse-ear cress) PE=1 SV=1	S	Function unknown	unnamed protein product [Coffea canephora]
F01_transcript/13134	--	--	--	--	--	[L]	Replication, recombination and repair	Domain of unknown function (DUF1771);; Smr domain	Polyadenylate-binding protein-interacting protein 7 GN=CID7 OS=Arabidopsis thaliana (Mouse-ear cress) PE=1 SV=1	S	Function unknown	PREDICTED: uncharacterized protein LOC105163956 isoform X2 [Sesamum indicum]
F01_transcript/15121	[QV]	--	Molecular Function: iron ion binding (GO:0005506);; Molecular Function: heme binding (GO:0020037);; Biological Process: oxidation-reduction process (GO:0055114);; Molecular Function: aromatase activity (GO:0070330);;	--	--	[QI]	--	Cytochrome P450	Cytochrome P450 97B2, chloroplastic (Precursor) GN=CYP97B2 OS=Glycine max (Soybean) PE=2 SV=1	Q	Secondary metabolites biosynthesis, transport and catabolism	hypothetical protein JCGZ_00485 [Jatropha curcas]
F01_transcript/27869	--	--	Cellular Component: cytosol (GO:0005829);; Cellular Component: plasma membrane (GO:0005886);; Cellular Component: plasmodesma (GO:0009506);; Cellular Component: integral component of membrane (GO:0016021);;	--	--	[O]	Posttranslational modification, protein turnover, chaperones	CS domain	Uncharacterized protein OsI_027940 OS=Oryza sativa subsp. indica (Rice) PE=1 SV=2	S	Function unknown	unnamed protein product [Coffea canephora]
F01_transcript/6959	--	--	Cellular Component: membrane (GO:0016020);;	--	--	--	--	Protein of unknown function (DUF616)	--	S	Function unknown	PREDICTED: uncharacterized protein LOC100248770 [Vitis vinifera]
F01_transcript/2469	--	--	--	--	--	--	--	Zein-binding	--	S	Function unknown	PREDICTED: uncharacterized protein LOC100268019 [Vitis vinifera]
F01_transcript/18195	[C]	Energy production and conversion	Molecular Function: calmodulin binding (GO:0005516);; Cellular Component: vacuolar membrane (GO:0005774);; Cellular Component: plasma membrane (GO:0005886);; Biological Process: lignin metabolic process (GO:0009808);; Biological Process: unidimensional cell growth (GO:0009826);; Biological Process: plant-type secondary cell wall biogenesis (GO:0009834);; Cellular Component: integral component of …	K09828|0|gmx:100814521|K09828 Delta24-sterol reductase [EC:1.3.1.72 1.3.1.-] | (RefSeq) delta(24)-sterol reductase	ko00100:Steroid biosynthesis	[R]	General function prediction only	FAD binding domain	Delta(24)-sterol reductase GN=DIM OS=Pisum sativum (Garden pea) PE=1 SV=1	C	Energy production and conversion	Delta(24)-sterol reductase [Morus notabilis]
F01_transcript/30100	--	--	Molecular Function: structural constituent of ribosome (GO:0003735);; Biological Process: translation (GO:0006412);; Cellular Component: cytosolic large ribosomal subunit (GO:0022625);;	K02882|4.0305e-124|sot:102601848|K02882 large subunit ribosomal protein L18Ae | (RefSeq) 60S ribosomal protein L18a-like	ko03010:Ribosome	[J]	Translation, ribosomal structure and biogenesis	Ribosomal proteins 50S-L18Ae/60S-L20/60S-L18A	60S ribosomal protein L18a GN=RPL18A OS=Castanea sativa (Sweet chestnut) PE=2 SV=1	J	Translation, ribosomal structure and biogenesis	60S ribosomal protein L18a-like [Solanum tuberosum]
F01_transcript/20442	--	--	--	--	--	--	--	Hsp20/alpha crystallin family	--	S	Function unknown	hypothetical protein PRUPE_ppa023477mg [Prunus persica]
F01_transcript/697	[T]	Signal transduction mechanisms	Molecular Function: protein kinase activity (GO:0004672);; Molecular Function: phosphoprotein phosphatase activity (GO:0004721);; Molecular Function: ATP binding (GO:0005524);; Cellular Component: plasma membrane (GO:0005886);; Biological Process: protein phosphorylation (GO:0006468);; Biological Process: protein dephosphorylation (GO:0006470);; Cellular Component: integral component of membrane …	--	--	[T]	Signal transduction mechanisms	Protein phosphatase 2C;; Cyclic nucleotide-binding domain;; Protein kinase domain;; Protein tyrosine kinase	Probable inactive cyclic nucleotide-dependent protein kinase At2g20050 GN=At2g20050/At2g20040 OS=Arabidopsis thaliana (Mouse-ear cress) PE=2 SV=2	T	Signal transduction mechanisms	PREDICTED: protein phosphatase 2C and cyclic nucleotide-binding/kinase domain-containing protein [Vitis vinifera]
F01_transcript/8024	[M]	Cell wall/membrane/envelope biogenesis	Molecular Function: ATP binding (GO:0005524);; Biological Process: regulation of cell shape (GO:0008360);; Biological Process: biosynthetic process (GO:0009058);; Cellular Component: nucleoid (GO:0009295);; Cellular Component: chloroplast (GO:0009507);; Biological Process: chloroplast fission (GO:0010020);; Molecular Function: acid-amino acid ligase activity (GO:0016881);; Biological Process: cel…	--	--	--	--	Mur ligase middle domain;; Mur ligase family, glutamate ligase domain;; Mur ligase family, catalytic domain	--	M	Cell wall/membrane/envelope biogenesis	PREDICTED: uncharacterized protein LOC104586371 [Nelumbo nucifera]
F01_transcript/1204	[N]	Cell motility	Cellular Component: integral component of membrane (GO:0016021);; Molecular Function: cellulose synthase (UDP-forming) activity (GO:0016760);; Biological Process: cellulose biosynthetic process (GO:0030244);; Biological Process: cell wall organization (GO:0071555);;	K20924|0|gmx:100792604|K20924 cellulose synthase-like protein [EC:2.4.1.-] | (RefSeq) cellulose synthase-like protein D2	--	--	--	Cellulose synthase;; RING/Ubox like zinc-binding domain;; Glycosyl transferase family group 2	Cellulose synthase-like protein D3 GN=T17B22.26 OS=Arabidopsis thaliana (Mouse-ear cress) PE=1 SV=1	M	Cell wall/membrane/envelope biogenesis	PREDICTED: cellulose synthase-like protein D2-like isoform X1 [Glycine max]
F01_transcript/10598	[R]	General function prediction only	Cellular Component: anaphase-promoting complex (GO:0005680);; Biological Process: embryo development ending in seed dormancy (GO:0009793);; Biological Process: regulation of mitotic metaphase/anaphase transition (GO:0030071);; Biological Process: anaphase-promoting complex-dependent catabolic process (GO:0031145);; Biological Process: plant ovule development (GO:0048481);;	K03351|0|vvi:100255109|K03351 anaphase-promoting complex subunit 4 | (RefSeq) anaphase-promoting complex subunit 4	ko04120:Ubiquitin mediated proteolysis	[DO]	--	Anaphase-promoting complex, cyclosome, subunit 4;; Anaphase-promoting complex subunit 4 WD40 domain	Anaphase-promoting complex subunit 4 GN=APC4 OS=Arabidopsis thaliana (Mouse-ear cress) PE=2 SV=2	O	Posttranslational modification, protein turnover, chaperones	PREDICTED: anaphase-promoting complex subunit 4-like isoform X1 [Vitis vinifera]
F01_transcript/12838	--	--	--	--	--	--	--	--	--	S	Function unknown	PREDICTED: uncharacterized protein LOC100266438 [Vitis vinifera]
F01_transcript/1875	--	--	--	--	--	[R]	General function prediction only	--	Auxilin-related protein 2 GN=At4g12770 OS=Arabidopsis thaliana (Mouse-ear cress) PE=1 SV=1	O	Posttranslational modification, protein turnover, chaperones	PREDICTED: auxilin-related protein 2-like [Vitis vinifera]
F01_transcript/18787	[E]	Amino acid transport and metabolism	Molecular Function: glycine hydroxymethyltransferase activity (GO:0004372);; Biological Process: glycine metabolic process (GO:0006544);; Biological Process: L-serine metabolic process (GO:0006563);; Molecular Function: methyltransferase activity (GO:0008168);; Molecular Function: pyridoxal phosphate binding (GO:0030170);; Biological Process: methylation (GO:0032259);; Biological Process: tetrahy…	K00600|0|pop:POPTR_0002s10990g|K00600 glycine hydroxymethyltransferase [EC:2.1.2.1] | (RefSeq) POPTRDRAFT_643921; hypothetical protein	ko00260:Glycine, serine and threonine metabolism;ko00460:Cyanoamino acid metabolism;ko00630:Glyoxylate and dicarboxylate metabolism;ko00670:One carbon pool by folate;ko01200:Carbon metabolism;ko01230:Biosynthesis of amino acids	[E]	Amino acid transport and metabolism	Serine hydroxymethyltransferase	Serine hydroxymethyltransferase 2, mitochondrial (Precursor) GN=F2P16.40 OS=Arabidopsis thaliana (Mouse-ear cress) PE=2 SV=2	E	Amino acid transport and metabolism	mitochondrial serine hydroxymethyltransferase [Populus tremuloides]
F01_transcript/434	--	--	--	--	--	--	--	Formin Homology 2 Domain;; C2 domain of PTEN tumour-suppressor protein	Formin-like protein 13 GN=FH13 OS=Arabidopsis thaliana (Mouse-ear cress) PE=2 SV=3	S	Function unknown	PREDICTED: formin-like protein 18 [Solanum lycopersicum]
F01_transcript/19422	[U]	Intracellular trafficking, secretion, and vesicular transport	Biological Process: protein transport (GO:0015031);; Cellular Component: integral component of membrane (GO:0016021);;	K10956|0|tcc:TCM_029640|K10956 protein transport protein SEC61 subunit alpha | (RefSeq) SecY protein transport family protein	ko03060:Protein export;ko04141:Protein processing in endoplasmic reticulum;ko04145:Phagosome	[UO]	--	SecY translocase;; Plug domain of Sec61p	Protein transport protein Sec61 subunit alpha OS=Pyrenomonas salina PE=2 SV=1	U	Intracellular trafficking, secretion, and vesicular transport	Protein transport Sec61 subunit alpha [Gossypium arboreum]
F01_transcript/740	--	--	Biological Process: transcription, DNA-templated (GO:0006351);;	--	--	--	--	DDT domain;; HB1, ASXL, restriction endonuclease HTH domain;; Williams-Beuren syndrome DDT (WSD), D-TOX E motif;; WSTF, HB1, Itc1p, MBD9 motif 1	--	K	Transcription	PREDICTED: uncharacterized protein LOC100250601 isoform X1 [Vitis vinifera]
F01_transcript/2959	[M]	Cell wall/membrane/envelope biogenesis	Molecular Function: protein serine/threonine kinase activity (GO:0004674);; Cellular Component: nucleus (GO:0005634);; Cellular Component: cytoplasm (GO:0005737);; Cellular Component: plasma membrane (GO:0005886);; Biological Process: intracellular signal transduction (GO:0035556);;	--	--	[R]	General function prediction only	Protein kinase domain;; Protein tyrosine kinase	Serine/threonine-protein kinase KIPK GN=KIPK OS=Arabidopsis thaliana (Mouse-ear cress) PE=1 SV=1	T	Signal transduction mechanisms	unnamed protein product [Coffea canephora]
F01_transcript/26216	[HC]	--	Cellular Component: chloroplast (GO:0009507);;	--	--	--	--	Oxidoreductase NAD-binding domain	Fruit protein pKIWI502 GN=pKIWI502 OS=Actinidia deliciosa (Kiwi) PE=2 SV=1	C	Energy production and conversion	RecName: Full=Fruit protein pKIWI502 [Actinidia deliciosa]
F01_transcript/29736	--	--	Cellular Component: integral component of membrane (GO:0016021);;	--	--	--	--	Protein of unknown function (DUF1218)	--	S	Function unknown	PREDICTED: uncharacterized protein LOC105160932 [Sesamum indicum]
F01_transcript/1373	[T]	Signal transduction mechanisms	Molecular Function: cAMP-dependent protein kinase activity (GO:0004691);; Molecular Function: cGMP-dependent protein kinase activity (GO:0004692);; Molecular Function: phosphoprotein phosphatase activity (GO:0004721);; Molecular Function: ATP binding (GO:0005524);; Cellular Component: plasma membrane (GO:0005886);; Biological Process: protein phosphorylation (GO:0006468);; Biological Process: pro…	--	--	[T]	Signal transduction mechanisms	Protein phosphatase 2C;; Protein kinase domain;; Cyclic nucleotide-binding domain;; Protein tyrosine kinase	Probable inactive cyclic nucleotide-dependent protein kinase At2g20050 GN=At2g20050/At2g20040 OS=Arabidopsis thaliana (Mouse-ear cress) PE=2 SV=2	T	Signal transduction mechanisms	PREDICTED: protein phosphatase 2C and cyclic nucleotide-binding/kinase domain-containing protein [Vitis vinifera]
F01_transcript/547	[T]	Signal transduction mechanisms	--	--	--	[T]	Signal transduction mechanisms	PB1 domain;; Protein tyrosine kinase;; Protein kinase domain;; Protein tyrosine kinase;; Protein kinase domain	Serine/threonine-protein kinase CTR1 GN=CTR1 OS=Arabidopsis thaliana (Mouse-ear cress) PE=1 SV=1	T	Signal transduction mechanisms	PREDICTED: uncharacterized protein LOC100242423 [Vitis vinifera]
F01_transcript/3624	--	--	--	--	--	--	--	--	--	S	Function unknown	hypothetical protein MTR_5g050970 [Medicago truncatula]
F01_transcript/26446	[O]	Posttranslational modification, protein turnover, chaperones	Molecular Function: GTPase activity (GO:0003924);; Biological Process: nitrogen compound metabolic process (GO:0006807);; Molecular Function: nickel cation binding (GO:0016151);;	K03189|1.99962e-168|mus:103999796|K03189 urease accessory protein | (RefSeq) urease accessory protein G	--	--	--	CobW/HypB/UreG, nucleotide-binding domain	Urease accessory protein G GN=UREG OS=Arabidopsis thaliana (Mouse-ear cress) PE=1 SV=1	KO	--	PREDICTED: urease accessory protein G [Musa acuminata subsp. malaccensis]
F01_transcript/33975	--	--	Biological Process: ribosomal small subunit assembly (GO:0000028);; Molecular Function: structural constituent of ribosome (GO:0003735);; Biological Process: translation (GO:0006412);; Cellular Component: cytosolic small ribosomal subunit (GO:0022627);; Molecular Function: metal ion binding (GO:0046872);;	K02978|7.42644e-29|mus:103971541|K02978 small subunit ribosomal protein S27e | (RefSeq) 40S ribosomal protein S27-2-like	ko03010:Ribosome	[J]	Translation, ribosomal structure and biogenesis	Ribosomal protein S27	40S ribosomal protein S27-2 OS=Arabidopsis thaliana (Mouse-ear cress) PE=2 SV=2	J	Translation, ribosomal structure and biogenesis	PREDICTED: 40S ribosomal protein S27-2-like [Nelumbo nucifera]
F01_transcript/21017	[QV]	--	Molecular Function: iron ion binding (GO:0005506);; Biological Process: lignin biosynthetic process (GO:0009809);; Cellular Component: integral component of membrane (GO:0016021);; Molecular Function: flavonoid 3'-monooxygenase activity (GO:0016711);; Molecular Function: heme binding (GO:0020037);; Biological Process: oxidation-reduction process (GO:0055114);;	--	--	[Q]	Secondary metabolites biosynthesis, transport and catabolism	Cytochrome P450	Cytochrome P450 98A2 GN=CYP98A2 OS=Glycine max (Soybean) PE=2 SV=1	Q	Secondary metabolites biosynthesis, transport and catabolism	p-coumaroyl ester 3&apos;-hydroxylases [Mangifera indica]
F01_transcript/31622	--	--	Molecular Function: actin binding (GO:0003779);; Cellular Component: cytoplasm (GO:0005737);; Cellular Component: cytoskeleton (GO:0005856);;	--	--	[Z]	Cytoskeleton	Profilin	Profilin-1 GN=PRO1 OS=Ricinus communis (Castor bean) PE=2 SV=1	O	Posttranslational modification, protein turnover, chaperones	Profilin-1 [Gossypium arboreum]
F01_transcript/27610	[VI]	--	Molecular Function: glutathione peroxidase activity (GO:0004602);; Biological Process: response to oxidative stress (GO:0006979);; Biological Process: oxidation-reduction process (GO:0055114);; Biological Process: cellular oxidant detoxification (GO:0098869);;	K00432|2.45654e-108|tcc:TCM_016241|K00432 glutathione peroxidase [EC:1.11.1.9] | (RefSeq) Glutathione peroxidase 6	ko00480:Glutathione metabolism;ko00590:Arachidonic acid metabolism	[O]	Posttranslational modification, protein turnover, chaperones	Glutathione peroxidase;; AhpC/TSA family;; Redoxin	Probable phospholipid hydroperoxide glutathione peroxidase OS=Nicotiana sylvestris (Wood tobacco) PE=2 SV=1	O	Posttranslational modification, protein turnover, chaperones	PREDICTED: probable phospholipid hydroperoxide glutathione peroxidase isoform X1 [Sesamum indicum]
F01_transcript/2224	--	--	--	--	--	--	--	RWP-RK domain;; PB1 domain	Protein NLP7 GN=NLP7 OS=Arabidopsis thaliana (Mouse-ear cress) PE=1 SV=2	S	Function unknown	PREDICTED: protein NLP6-like [Vitis vinifera]
F01_transcript/30467	--	--	--	--	--	--	--	--	--	S	Function unknown	PREDICTED: cold shock domain-containing protein 4-like [Vitis vinifera]
F01_transcript/18451	--	--	--	--	--	--	--	--	BTB/POZ domain-containing protein At2g13690 GN=PRL1-IFG OS=Arabidopsis thaliana (Mouse-ear cress) PE=2 SV=2	S	Function unknown	PREDICTED: BTB/POZ domain-containing protein At2g13690 [Vitis vinifera]
F01_transcript/19464	[J]	Translation, ribosomal structure and biogenesis	Molecular Function: nucleotide binding (GO:0000166);; Biological Process: spliceosomal snRNP assembly (GO:0000387);; Cellular Component: Prp19 complex (GO:0000974);; Molecular Function: U6 snRNA binding (GO:0017070);; Molecular Function: pre-mRNA binding (GO:0036002);; Molecular Function: metal ion binding (GO:0046872);; Cellular Component: U2-type catalytic step 1 spliceosome (GO:0071006);; Cell…	K12872|0|vvi:100241603|K12872 pre-mRNA-splicing factor RBM22/SLT11 | (RefSeq) zinc finger CCCH domain-containing protein 49	ko03040:Spliceosome	[R]	General function prediction only	RNA recognition motif. (a.k.a. RRM, RBD, or RNP domain);; Torus domain	Zinc finger CCCH domain-containing protein 49 OS=Oryza sativa subsp. japonica (Rice) PE=2 SV=1	S	Function unknown	PREDICTED: zinc finger CCCH domain-containing protein 49 [Vitis vinifera]
F01_transcript/7664	--	--	Cellular Component: integral component of membrane (GO:0016021);; Biological Process: lipid catabolic process (GO:0016042);; Molecular Function: hydrolase activity (GO:0016787);;	--	--	[IOT]	--	Lipase (class 3);; Lipase 3 N-terminal region	--	S	Function unknown	PREDICTED: uncharacterized protein LOC105172455 isoform X1 [Sesamum indicum]
F01_transcript/9725	--	--	Molecular Function: zinc ion binding (GO:0008270);;	--	--	[R]	General function prediction only	PPR repeat family;; PPR repeat;; PPR repeat;; Pentatricopeptide repeat domain;; DYW family of nucleic acid deaminases;; Pentacotripeptide-repeat region of PRORP	Pentatricopeptide repeat-containing protein At3g22690 GN=PCMP-H56 OS=Arabidopsis thaliana (Mouse-ear cress) PE=2 SV=1	S	Function unknown	PREDICTED: pentatricopeptide repeat-containing protein At3g22690 [Vitis vinifera]
F01_transcript/33683	--	--	Cellular Component: plasma membrane (GO:0005886);;	--	--	--	--	Cleavage site for pathogenic type III effector avirulence factor Avr	RPM1-interacting protein 4 GN=RIN4 OS=Arabidopsis thaliana (Mouse-ear cress) PE=1 SV=1	S	Function unknown	PREDICTED: RPM1-interacting protein 4-like isoform X2 [Nicotiana sylvestris]
F01_transcript/32983	--	--	Cellular Component: mitochondrial respiratory chain complex I (GO:0005747);; Molecular Function: NADH dehydrogenase (ubiquinone) activity (GO:0008137);; Biological Process: oxidation-reduction process (GO:0055114);;	K03952|1.42215e-58|vvi:100266511|K03952 NADH dehydrogenase (ubiquinone) 1 alpha subcomplex subunit 8 | (RefSeq) NADH dehydrogenase [ubiquinone] 1 alpha subcomplex subunit 8-B	ko00190:Oxidative phosphorylation	[C]	Energy production and conversion	CHCH domain;; CHCH-CHCH-like Cx9C, IMS import disulfide relay-system,	NADH dehydrogenase [ubiquinone] 1 alpha subcomplex subunit 8-B GN=At5g18800 OS=Arabidopsis thaliana (Mouse-ear cress) PE=1 SV=1	I	Lipid transport and metabolism	unnamed protein product [Coffea canephora]
F01_transcript/25046	--	--	Molecular Function: RNA polymerase II regulatory region sequence-specific DNA binding (GO:0000977);; Molecular Function: RNA polymerase II transcription factor binding (GO:0001085);; Molecular Function: transcriptional activator activity, RNA polymerase II transcription regulatory region sequence-specific binding (GO:0001228);; Molecular Function: chromatin binding (GO:0003682);; Cellular Compone…	--	--	[K]	Transcription	CCT motif;; GATA zinc finger;; tify domain;; Divergent CCT motif	GATA transcription factor 25 GN=T22A6.300 OS=Arabidopsis thaliana (Mouse-ear cress) PE=2 SV=2	K	Transcription	hypothetical protein JCGZ_15904 [Jatropha curcas]
F01_transcript/27679	[O]	Posttranslational modification, protein turnover, chaperones	Molecular Function: copper ion binding (GO:0005507);; Molecular Function: ATP binding (GO:0005524);; Cellular Component: mitochondrial matrix (GO:0005759);; Biological Process: response to unfolded protein (GO:0006986);; Cellular Component: chloroplast thylakoid membrane (GO:0009535);; Cellular Component: chloroplast stroma (GO:0009570);; Cellular Component: chloroplast envelope (GO:0009941);; Ce…	--	--	[O]	Posttranslational modification, protein turnover, chaperones	Chaperonin 10 Kd subunit	20 kDa chaperonin, chloroplastic (Precursor) GN=T1M15.120 OS=Arabidopsis thaliana (Mouse-ear cress) PE=1 SV=2	O	Posttranslational modification, protein turnover, chaperones	groes chaperonin, putative [Ricinus communis]
F01_transcript/24375	--	--	Cellular Component: endosome (GO:0005768);; Cellular Component: trans-Golgi network (GO:0005802);; Cellular Component: integral component of membrane (GO:0016021);; Molecular Function: heme binding (GO:0020037);;	--	--	--	--	Ethylbenzene dehydrogenase	--	S	Function unknown	hypothetical protein VITISV_023420 [Vitis vinifera]
F01_transcript/32621	--	--	Molecular Function: zinc ion binding (GO:0008270);; Molecular Function: NEDD8 transferase activity (GO:0019788);; Biological Process: SCF-dependent proteasomal ubiquitin-dependent protein catabolic process (GO:0031146);; Cellular Component: Cul2-RING ubiquitin ligase complex (GO:0031462);; Cellular Component: Cul3-RING ubiquitin ligase complex (GO:0031463);; Cellular Component: Cul7-RING ubiquiti…	--	--	[O]	Posttranslational modification, protein turnover, chaperones	RING-H2 zinc finger domain;; Anaphase-promoting complex subunit 11 RING-H2 finger;; Ring finger domain	RING-box protein 1a GN=F7C8.160 OS=Arabidopsis thaliana (Mouse-ear cress) PE=1 SV=1	O	Posttranslational modification, protein turnover, chaperones	hypothetical protein AMTR_s00024p00244120 [Amborella trichopoda]
F01_transcript/33866	--	--	Molecular Function: metal ion binding (GO:0046872);;	--	--	--	--	--	Metallothionein-like protein type 3 GN=pKIWI503 OS=Actinidia deliciosa (Kiwi) PE=2 SV=1	S	Function unknown	RecName: Full=Metallothionein-like protein type 3 [Actinidia deliciosa]
F01_transcript/30833	--	--	--	--	--	--	--	--	--	--	--	PREDICTED: uncharacterized protein LOC104113316 [Nicotiana tomentosiformis]
F01_transcript/21931	[EH]	--	Biological Process: branched-chain amino acid metabolic process (GO:0009081);; Cellular Component: chloroplast stroma (GO:0009570);; Molecular Function: L-leucine transaminase activity (GO:0052654);; Molecular Function: L-valine transaminase activity (GO:0052655);; Molecular Function: L-isoleucine transaminase activity (GO:0052656);;	K00826|0|sly:101245812|K00826 branched-chain amino acid aminotransferase [EC:2.6.1.42] | (RefSeq) branched-chain-amino-acid aminotransferase 5, chloroplastic-like	ko00270:Cysteine and methionine metabolism;ko00280:Valine, leucine and isoleucine degradation;ko00290:Valine, leucine and isoleucine biosynthesis;ko00770:Pantothenate and CoA biosynthesis;ko01210:2-Oxocarboxylic acid metabolism;ko01230:Biosynthesis of amino acids	[E]	Amino acid transport and metabolism	Amino-transferase class IV	Branched-chain-amino-acid aminotransferase 3, chloroplastic {ECO:0000303|PubMed:12068099} (Precursor) OS=Arabidopsis thaliana (Mouse-ear cress) PE=1 SV=1	E	Amino acid transport and metabolism	hypothetical protein MIMGU_mgv1a007087mg [Erythranthe guttata]
F01_transcript/12940	--	--	--	--	--	--	--	Protein of unknown function (DUF4005);; IQ calmodulin-binding motif	Protein IQ-DOMAIN 31 GN=IQD31 OS=Arabidopsis thaliana (Mouse-ear cress) PE=1 SV=1	S	Function unknown	PREDICTED: protein IQ-DOMAIN 31 [Vitis vinifera]
F01_transcript/8387	[T]	Signal transduction mechanisms	Molecular Function: protein serine/threonine kinase activity (GO:0004674);; Molecular Function: ATP binding (GO:0005524);; Biological Process: protein phosphorylation (GO:0006468);;	--	--	[T]	Signal transduction mechanisms	Protein kinase domain;; Protein tyrosine kinase	Cyclin-dependent kinase F-4 OS=Oryza sativa subsp. japonica (Rice) PE=2 SV=1	T	Signal transduction mechanisms	PREDICTED: cyclin-dependent kinase F-4 [Vitis vinifera]
F01_transcript/4039	[K]	Transcription	Molecular Function: nucleotide binding (GO:0000166);; Molecular Function: protein kinase activity (GO:0004672);; Cellular Component: membrane (GO:0016020);; Biological Process: phosphorylation (GO:0016310);;	--	--	--	--	Leucine rich repeat;; Leucine Rich repeats (2 copies);; Leucine Rich Repeat;; Protein kinase domain;; Protein tyrosine kinase;; Protein tyrosine kinase;; Protein kinase domain;; Leucine rich repeat N-terminal domain;; Leucine Rich repeats (2 copies);; Leucine rich repeat;; Leucine Rich Repeat;; Leucine rich repeat;; Leucine Rich repeats (2 copies);; Leucine Rich Repeat	Probable LRR receptor-like serine/threonine-protein kinase At3g47570 (Precursor) GN=At3g47570 OS=Arabidopsis thaliana (Mouse-ear cress) PE=2 SV=1	S	Function unknown	PREDICTED: putative receptor-like protein kinase At3g47110 [Prunus mume]
F01_transcript/10157	[L]	Replication, recombination and repair	Molecular Function: nucleic acid binding (GO:0003676);; Molecular Function: ATP-dependent RNA helicase activity (GO:0004004);; Molecular Function: ATP binding (GO:0005524);; Biological Process: RNA secondary structure unwinding (GO:0010501);;	K12835|0|vvi:100241725|K12835 ATP-dependent RNA helicase DDX42 [EC:3.6.4.13] | (RefSeq) DEAD-box ATP-dependent RNA helicase 24	ko03040:Spliceosome	[A]	RNA processing and modification	DEAD/DEAH box helicase;; Helicase conserved C-terminal domain	DEAD-box ATP-dependent RNA helicase 24 GN=RH24 OS=Arabidopsis thaliana (Mouse-ear cress) PE=1 SV=2	L	Replication, recombination and repair	PREDICTED: DEAD-box ATP-dependent RNA helicase 24 [Vitis vinifera]
F01_transcript/18853	--	--	Cellular Component: nuclear pore (GO:0005643);; Cellular Component: nucleoplasm (GO:0005654);; Cellular Component: cytosol (GO:0005829);; Biological Process: NLS-bearing protein import into nucleus (GO:0006607);; Molecular Function: nuclear localization sequence binding (GO:0008139);; Molecular Function: protein transporter activity (GO:0008565);;	--	--	[U]	Intracellular trafficking, secretion, and vesicular transport	Armadillo/beta-catenin-like repeat;; HEAT-like repeat;; Importin beta binding domain;; Atypical Arm repeat;; HEAT repeats;; HEAT repeat	Importin subunit alpha-4 {ECO:0000305} OS=Arabidopsis thaliana (Mouse-ear cress) PE=1 SV=1	U	Intracellular trafficking, secretion, and vesicular transport	PREDICTED: importin subunit alpha-1 [Solanum tuberosum]
F01_transcript/33992	--	--	--	--	--	--	--	Wound-induced protein	--	S	Function unknown	PREDICTED: uncharacterized protein LOC104585806 [Nelumbo nucifera]
F01_transcript/28803	--	--	Cellular Component: nucleus (GO:0005634);; Molecular Function: protein heterodimerization activity (GO:0046982);;	--	--	[K]	Transcription	Histone-like transcription factor (CBF/NF-Y) and archaeal histone	Nuclear transcription factor Y subunit C-3 OS=Arabidopsis thaliana (Mouse-ear cress) PE=2 SV=1	K	Transcription	PREDICTED: nuclear transcription factor Y subunit C-1-like [Pyrus x bretschneideri]
F01_transcript/29463	[O]	Posttranslational modification, protein turnover, chaperones	Molecular Function: glutathione transferase activity (GO:0004364);; Cellular Component: cytoplasm (GO:0005737);; Biological Process: glutathione metabolic process (GO:0006749);; Biological Process: aromatic amino acid family metabolic process (GO:0009072);; Molecular Function: maleylacetoacetate isomerase activity (GO:0016034);;	K01800|6.05073e-113|vvi:100252270|K01800 maleylacetoacetate isomerase [EC:5.2.1.2] | (RefSeq) glutathione S-transferase zeta class	ko00350:Tyrosine metabolism	[O]	Posttranslational modification, protein turnover, chaperones	Glutathione S-transferase, N-terminal domain;; Glutathione S-transferase, N-terminal domain;; Glutathione S-transferase, N-terminal domain;; Glutathione S-transferase, C-terminal domain	Glutathione S-transferase zeta class OS=Euphorbia esula (Leafy spurge) PE=2 SV=1	O	Posttranslational modification, protein turnover, chaperones	PREDICTED: glutathione S-transferase zeta class-like [Vitis vinifera]
F01_transcript/8756	--	--	--	--	--	--	--	--	Probable WRKY transcription factor 19 GN=WRKY19 OS=Arabidopsis thaliana (Mouse-ear cress) PE=2 SV=1	S	Function unknown	PREDICTED: uncharacterized protein LOC100255255 [Vitis vinifera]
F01_transcript/27680	--	--	Cellular Component: nucleus (GO:0005634);; Cellular Component: endoplasmic reticulum (GO:0005783);; Cellular Component: chloroplast thylakoid membrane (GO:0009535);; Cellular Component: integral component of membrane (GO:0016021);; Molecular Function: oxidoreductase activity (GO:0016491);; Molecular Function: heme binding (GO:0020037);;	--	--	[R]	General function prediction only	Cytochrome b5-like Heme/Steroid binding domain	Membrane steroid-binding protein 2 OS=Arabidopsis thaliana (Mouse-ear cress) PE=1 SV=1	S	Function unknown	PREDICTED: membrane steroid-binding protein 2 [Eucalyptus grandis]
F01_transcript/13304	[T]	Signal transduction mechanisms	Molecular Function: protein serine/threonine kinase activity (GO:0004674);; Molecular Function: non-membrane spanning protein tyrosine kinase activity (GO:0004715);; Molecular Function: ATP binding (GO:0005524);; Cellular Component: plasma membrane (GO:0005886);; Biological Process: peptidyl-tyrosine phosphorylation (GO:0018108);; Biological Process: innate immune response (GO:0045087);;	--	--	[T]	Signal transduction mechanisms	Protein kinase domain;; Protein tyrosine kinase	Serine/threonine-protein kinase PBS1 GN=PBS1 OS=Arabidopsis thaliana (Mouse-ear cress) PE=1 SV=1	T	Signal transduction mechanisms	PREDICTED: serine/threonine-protein kinase CDL1 [Vitis vinifera]
F01_transcript/28069	[H]	Coenzyme transport and metabolism	Cellular Component: chloroplast (GO:0009507);;	--	--	[S]	Function unknown	Uncharacterised protein family UPF0047	--	S	Function unknown	PREDICTED: UPF0047 protein C4A8.02c [Eucalyptus grandis]
F01_transcript/26847	[J]	Translation, ribosomal structure and biogenesis	Biological Process: ribosomal small subunit assembly (GO:0000028);; Molecular Function: structural constituent of ribosome (GO:0003735);; Cellular Component: mitochondrial small ribosomal subunit (GO:0005763);; Biological Process: translation (GO:0006412);; Cellular Component: chloroplast (GO:0009507);; Molecular Function: rRNA binding (GO:0019843);; Cellular Component: cytosolic small ribosomal …	--	--	[J]	Translation, ribosomal structure and biogenesis	Ribosomal protein S19	Ribosomal protein S19, mitochondrial GN=RPS19 OS=Petunia hybrida (Petunia) PE=2 SV=2	J	Translation, ribosomal structure and biogenesis	ribosomal protein S19 [Cucurbita pepo]
F01_transcript/12788	[M]	Cell wall/membrane/envelope biogenesis	Molecular Function: 3-beta-hydroxy-delta5-steroid dehydrogenase activity (GO:0003854);; Cellular Component: endoplasmic reticulum membrane (GO:0005789);; Biological Process: steroid biosynthetic process (GO:0006694);; Cellular Component: integral component of membrane (GO:0016021);; Biological Process: oxidation-reduction process (GO:0055114);;	K07748|0|vvi:100257631|K07748 sterol-4alpha-carboxylate 3-dehydrogenase (decarboxylating) [EC:1.1.1.170] | (RefSeq) 3beta-hydroxysteroid-dehydrogenase/decarboxylase	ko00100:Steroid biosynthesis	[IE]	--	3-beta hydroxysteroid dehydrogenase/isomerase family;; Reticulon;; NAD dependent epimerase/dehydratase family;; GDP-mannose 4,6 dehydratase;; Male sterility protein;; RmlD substrate binding domain;; NAD(P)H-binding;; Polysaccharide biosynthesis protein;; NmrA-like family	3beta-hydroxysteroid-dehydrogenase/decarboxylase isoform 2 GN=T1D16.10 OS=Arabidopsis thaliana (Mouse-ear cress) PE=2 SV=2	M	Cell wall/membrane/envelope biogenesis	PREDICTED: 3beta-hydroxysteroid-dehydrogenase/decarboxylase isoform 2 [Vitis vinifera]
F01_transcript/7696	[L]	Replication, recombination and repair	Molecular Function: helicase activity (GO:0004386);; Biological Process: virus induced gene silencing (GO:0009616);; Biological Process: posttranscriptional gene silencing by RNA (GO:0035194);;	K18422|0|pop:POPTR_0005s04900g|K18422 helicase MOV-10 [EC:3.6.4.13] | (RefSeq) hypothetical protein	--	[A]	RNA processing and modification	AAA domain;; AAA domain;; AAA domain;; Type III restriction enzyme, res subunit;; AAA domain;; UvrD/REP helicase N-terminal domain;; AAA domain	Probable RNA helicase SDE3 GN=SDE3 OS=Arabidopsis thaliana (Mouse-ear cress) PE=1 SV=1	L	Replication, recombination and repair	PREDICTED: probable RNA helicase SDE3 [Nelumbo nucifera]
F01_transcript/21484	--	--	Molecular Function: S-adenosylmethionine-dependent methyltransferase activity (GO:0008757);; Cellular Component: intracellular ribonucleoprotein complex (GO:0030529);; Cellular Component: nuclear lumen (GO:0031981);; Biological Process: ncRNA processing (GO:0034470);; Biological Process: macromolecule methylation (GO:0043414);; Biological Process: cellular component organization or biogenesis (GO…	--	--	--	--	--	--	S	Function unknown	hypothetical protein JCGZ_21714 [Jatropha curcas]
F01_transcript/27755	--	--	Cellular Component: endoplasmic reticulum (GO:0005783);; Cellular Component: integral component of membrane (GO:0016021);;	--	--	--	--	--	--	S	Function unknown	unknown protein [Vitis vinifera]
F01_transcript/13832	--	--	Biological Process: transcription from RNA polymerase II promoter (GO:0006366);;	--	--	--	--	--	--	S	Function unknown	PREDICTED: uncharacterized protein LOC100255280 [Vitis vinifera]
F01_transcript/33082	--	--	Molecular Function: nucleotide binding (GO:0000166);; Cellular Component: nuclear nucleosome (GO:0000788);; Molecular Function: DNA binding (GO:0003677);; Cellular Component: nucleolus (GO:0005730);; Cellular Component: vacuolar membrane (GO:0005774);; Cellular Component: Golgi apparatus (GO:0005794);; Cellular Component: cytosol (GO:0005829);; Cellular Component: plasma membrane (GO:0005886);; B…	K11254|1.60873e-43|aly:ARALYDRAFT_470793|K11254 histone H4 | (RefSeq) hypothetical protein	--	[B]	Chromatin structure and dynamics	Centromere kinetochore component CENP-T histone fold;; TATA box binding protein associated factor (TAF)	Histone H4 OS=Glycine max (Soybean) PE=3 SV=1	B	Chromatin structure and dynamics	hypothetical protein ZEAMMB73_313798 [Zea mays]
F01_transcript/14417	[C]	Energy production and conversion	Molecular Function: ATP binding (GO:0005524);; Cellular Component: mitochondrion (GO:0005739);; Cellular Component: plasma membrane (GO:0005886);; Cellular Component: chloroplast thylakoid membrane (GO:0009535);; Biological Process: ATP synthesis coupled proton transport (GO:0015986);; Biological Process: ATP hydrolysis coupled proton transport (GO:0015991);; Cellular Component: proton-transporti…	K02111|0|vvi:7498527|K02111 F-type H+-transporting ATPase subunit alpha [EC:3.6.3.14] | (RefSeq) atpA, ViviM_p099; ATPase alpha subunit	ko00190:Oxidative phosphorylation;ko00195:Photosynthesis	[C]	Energy production and conversion	ATP synthase alpha/beta family, nucleotide-binding domain;; ATP synthase alpha/beta chain, C terminal domain;; ATP synthase alpha/beta family, beta-barrel domain;; ATP synthase B/B' CF(0)	ATP synthase subunit alpha, chloroplastic {ECO:0000255|HAMAP-Rule:MF_01346} OS=Helianthus annuus (Common sunflower) PE=3 SV=1	C	Energy production and conversion	ATP synthase CF1 alpha subunit (chloroplast) [Penthorum chinense]
F01_transcript/28061	[J]	Translation, ribosomal structure and biogenesis	Molecular Function: RNA binding (GO:0003723);; Cellular Component: nucleolus (GO:0005730);;	K11884|5.5101e-144|vvi:100249193|K11884 RNA-binding protein PNO1 | (RefSeq) RNA-binding protein PNO1-like	--	[O]	Posttranslational modification, protein turnover, chaperones	KH domain	--	S	Function unknown	PREDICTED: RNA-binding protein PNO1-like [Vitis vinifera]
F01_transcript/26552	[J]	Translation, ribosomal structure and biogenesis	Molecular Function: structural constituent of ribosome (GO:0003735);; Cellular Component: mitochondrial large ribosomal subunit (GO:0005762);; Biological Process: translation (GO:0006412);; Cellular Component: chloroplast stroma (GO:0009570);; Cellular Component: chloroplast envelope (GO:0009941);; Cellular Component: membrane (GO:0016020);; Biological Process: ribosome biogenesis (GO:0042254);;	K02884|5.53364e-61|vvi:100263826|K02884 large subunit ribosomal protein L19 | (RefSeq) 50S ribosomal protein L19-2, chloroplastic	ko03010:Ribosome	[J]	Translation, ribosomal structure and biogenesis	Ribosomal protein L19	50S ribosomal protein L19-1, chloroplastic (Precursor) GN=At4g17560 OS=Arabidopsis thaliana (Mouse-ear cress) PE=2 SV=1	J	Translation, ribosomal structure and biogenesis	PREDICTED: 50S ribosomal protein L19, chloroplastic-like [Nicotiana tomentosiformis]
F01_transcript/29708	[O]	Posttranslational modification, protein turnover, chaperones	Biological Process: protein peptidyl-prolyl isomerization (GO:0000413);; Molecular Function: peptidyl-prolyl cis-trans isomerase activity (GO:0003755);; Cellular Component: cytoplasm (GO:0005737);; Biological Process: protein folding (GO:0006457);; Molecular Function: peptide binding (GO:0042277);;	--	--	[O]	Posttranslational modification, protein turnover, chaperones	Cyclophilin type peptidyl-prolyl cis-trans isomerase/CLD	Peptidyl-prolyl cis-trans isomerase GN=PCKR1 OS=Catharanthus roseus (Madagascar periwinkle) PE=1 SV=1	O	Posttranslational modification, protein turnover, chaperones	cyclophilin, putative [Ricinus communis]
F01_transcript/9439	[I]	Lipid transport and metabolism	Biological Process: long-chain fatty acid metabolic process (GO:0001676);; Molecular Function: long-chain fatty acid-CoA ligase activity (GO:0004467);; Cellular Component: endoplasmic reticulum (GO:0005783);; Cellular Component: Golgi apparatus (GO:0005794);; Cellular Component: chloroplast envelope (GO:0009941);; Cellular Component: integral component of membrane (GO:0016021);;	K01897|0|sot:102594464|K01897 long-chain acyl-CoA synthetase [EC:6.2.1.3] | (RefSeq) long chain acyl-CoA synthetase 8-like	ko00061:Fatty acid biosynthesis;ko00071:Fatty acid degradation;ko01212:Fatty acid metabolism;ko04146:Peroxisome	[I]	Lipid transport and metabolism	AMP-binding enzyme	Long chain acyl-CoA synthetase 8 GN=LACS8 OS=Arabidopsis thaliana (Mouse-ear cress) PE=1 SV=1	I	Lipid transport and metabolism	long-chain acyl-CoA synthetase 2 [Camellia oleifera]
F01_transcript/21335	[QV]	--	Molecular Function: iron ion binding (GO:0005506);; Biological Process: lignin metabolic process (GO:0009808);; Cellular Component: integral component of membrane (GO:0016021);; Molecular Function: trans-cinnamate 4-monooxygenase activity (GO:0016710);; Molecular Function: heme binding (GO:0020037);; Biological Process: secondary metabolite biosynthetic process (GO:0044550);; Molecular Function: …	K00487|0|pop:POPTR_0013s15380g|K00487 trans-cinnamate 4-monooxygenase [EC:1.14.13.11] | (RefSeq) POPTRDRAFT_823837A, POPTRDRAFT_823837B; hypothetical protein	ko00130:Ubiquinone and other terpenoid-quinone biosynthesis;ko00360:Phenylalanine metabolism;ko00940:Phenylpropanoid biosynthesis;ko00941:Flavonoid biosynthesis;ko00945:Stilbenoid, diarylheptanoid and gingerol biosynthesis	[Q]	Secondary metabolites biosynthesis, transport and catabolism	Cytochrome P450	Trans-cinnamate 4-monooxygenase GN=CYP73A4 OS=Catharanthus roseus (Madagascar periwinkle) PE=2 SV=1	Q	Secondary metabolites biosynthesis, transport and catabolism	cinnamic acid 4-hydroxylase [Camellia chekiangoleosa]
F01_transcript/9659	--	--	Cellular Component: plant-type vacuole (GO:0000325);; Molecular Function: voltage-gated calcium channel activity (GO:0005245);; Molecular Function: calcium ion binding (GO:0005509);; Cellular Component: vacuolar membrane (GO:0005774);; Cellular Component: Golgi apparatus (GO:0005794);; Cellular Component: plasma membrane (GO:0005886);; Biological Process: defense response (GO:0006952);; Biologica…	K16900|0|tcc:TCM_008109|K16900 two pore calcium channel protein, plant | (RefSeq) Two-pore channel 1	--	[PT]	--	Ion transport protein;; EF-hand domain pair	Two pore calcium channel protein 1A GN=TPC1A OS=Nicotiana tabacum (Common tobacco) PE=2 SV=1	U	Intracellular trafficking, secretion, and vesicular transport	PREDICTED: two pore calcium channel protein 1 [Populus euphratica]
F01_transcript/22273	--	--	--	K10523|0|vvi:100259862|K10523 speckle-type POZ protein | (RefSeq) BTB/POZ and MATH domain-containing protein 4	--	[DR]	--	BTB/POZ domain	BTB/POZ and MATH domain-containing protein 4 GN=BPM4 OS=Arabidopsis thaliana (Mouse-ear cress) PE=1 SV=1	S	Function unknown	hypothetical protein MIMGU_mgv1a007584mg [Erythranthe guttata]
F01_transcript/13761	[I]	Lipid transport and metabolism	Molecular Function: phosphoethanolamine N-methyltransferase activity (GO:0000234);; Cellular Component: cytosol (GO:0005829);; Biological Process: phosphatidylcholine biosynthetic process (GO:0006656);; Biological Process: pollen development (GO:0009555);; Biological Process: pollen tube growth (GO:0009860);; Biological Process: pollen tube guidance (GO:0010183);; Biological Process: methylation …	K05929|4.848e-160|vvi:100254279|K05929 phosphoethanolamine N-methyltransferase [EC:2.1.1.103] | (RefSeq) phosphomethylethanolamine N-methyltransferase	ko00564:Glycerophospholipid metabolism	[IR]	--	Methyltransferase domain;; Methyltransferase domain;; Methyltransferase domain;; AdoMet dependent proline di-methyltransferase;; Methyltransferase domain;; Tellurite resistance protein TehB;; Nodulation protein S (NodS);; CheR methyltransferase, SAM binding domain;; ubiE/COQ5 methyltransferase family;; Methyltransferase domain;; Methyltransferase domain;; Methyltransferase domain;; Methyltransfer…	Phosphoethanolamine N-methyltransferase 1 GN=MEB5.22 OS=Arabidopsis thaliana (Mouse-ear cress) PE=1 SV=1	S	Function unknown	PREDICTED: phosphoethanolamine N-methyltransferase-like [Nelumbo nucifera]
F01_transcript/23941	--	--	Cellular Component: integral component of membrane (GO:0016021);;	--	--	--	--	Plant phosphoribosyltransferase C-terminal;; Plant phosphoribosyltransferase C-terminal	--	S	Function unknown	PREDICTED: multiple C2 and transmembrane domain-containing protein 1-like [Musa acuminata subsp. malaccensis]
F01_transcript/24871	[Q]	Secondary metabolites biosynthesis, transport and catabolism	Molecular Function: oxidoreductase activity, acting on paired donors, with incorporation or reduction of molecular oxygen, 2-oxoglutarate as one donor, and incorporation of one atom each of oxygen into both donors (GO:0016706);; Molecular Function: metal ion binding (GO:0046872);; Biological Process: oxidation-reduction process (GO:0055114);;	--	--	[QR]	--	2OG-Fe(II) oxygenase superfamily;; non-haem dioxygenase in morphine synthesis N-terminal	Probable 2-oxoglutarate/Fe(II)-dependent dioxygenase GN=DIOX2 OS=Papaver somniferum (Opium poppy) PE=2 SV=1	S	Function unknown	hypothetical protein CICLE_v10005336mg [Citrus clementina]
F01_transcript/23971	[C]	Energy production and conversion	Cellular Component: integral component of membrane (GO:0016021);;	--	--	--	--	Sucrase/ferredoxin-like	--	S	Function unknown	hypothetical protein PRUPE_ppa007563mg [Prunus persica]
F01_transcript/30124	[O]	Posttranslational modification, protein turnover, chaperones	Cellular Component: endoplasmic reticulum (GO:0005783);;	K13993|4.9181e-58|pper:PRUPE_ppa015151mg|K13993 HSP20 family protein | (RefSeq) hypothetical protein	ko04141:Protein processing in endoplasmic reticulum	[O]	Posttranslational modification, protein turnover, chaperones	Hsp20/alpha crystallin family;; CS domain	22.7 kDa class IV heat shock protein (Precursor) GN=HSP22.7 OS=Pisum sativum (Garden pea) PE=2 SV=1	O	Posttranslational modification, protein turnover, chaperones	hypothetical protein JCGZ_06695 [Jatropha curcas]
F01_transcript/13937	--	--	Molecular Function: DNA binding (GO:0003677);; Molecular Function: protein dimerization activity (GO:0046983);;	--	--	--	--	Protein of unknown function (DUF 659);; hAT family C-terminal dimerisation region;; BED zinc finger	--	S	Function unknown	PREDICTED: uncharacterized protein LOC105160395 [Sesamum indicum]
F01_transcript/33733	--	--	Biological Process: cytoplasmic translation (GO:0002181);; Molecular Function: structural constituent of ribosome (GO:0003735);; Cellular Component: cytosolic large ribosomal subunit (GO:0022625);;	K02905|2.86708e-33|vvi:100251756|K02905 large subunit ribosomal protein L29e | (RefSeq) 60S ribosomal protein L29	ko03010:Ribosome	[J]	Translation, ribosomal structure and biogenesis	Ribosomal L29e protein family	60S ribosomal protein L29-1 GN=RPL29A OS=Arabidopsis thaliana (Mouse-ear cress) PE=1 SV=1	J	Translation, ribosomal structure and biogenesis	PREDICTED: 60S ribosomal protein L29-1 [Vitis vinifera]
F01_transcript/5578	--	--	--	--	--	--	--	Plant calmodulin-binding domain	--	S	Function unknown	Plant calmodulin-binding protein-related, putative isoform 1 [Theobroma cacao]
F01_transcript/1296	--	--	Molecular Function: RNA binding (GO:0003723);;	K17943|0|vvi:100243338|K17943 pumilio RNA-binding family | (RefSeq) pumilio homolog 2	--	[J]	Translation, ribosomal structure and biogenesis	Nucleic acid binding protein NABP;; Pumilio-family RNA binding repeat	Pumilio homolog 1 GN=APUM1 OS=Arabidopsis thaliana (Mouse-ear cress) PE=1 SV=1	J	Translation, ribosomal structure and biogenesis	PREDICTED: pumilio homolog 2 isoform X2 [Vitis vinifera]
F01_transcript/19944	[T]	Signal transduction mechanisms	Molecular Function: protein serine/threonine kinase activity (GO:0004674);; Molecular Function: ATP binding (GO:0005524);; Cellular Component: nucleus (GO:0005634);; Biological Process: protein phosphorylation (GO:0006468);; Biological Process: response to salt stress (GO:0009651);; Cellular Component: plant-type vacuole membrane (GO:0009705);; Cellular Component: integral component of membrane (…	--	--	[T]	Signal transduction mechanisms	Protein kinase domain;; Protein tyrosine kinase;; NAF domain;; Kinase-like	CBL-interacting serine/threonine-protein kinase 24 OS=Arabidopsis thaliana (Mouse-ear cress) PE=1 SV=1	T	Signal transduction mechanisms	CBL-interacting protein kinase 09 [Vitis vinifera]
F01_transcript/24044	--	--	Molecular Function: peroxidase activity (GO:0004601);; Cellular Component: extracellular region (GO:0005576);; Biological Process: response to oxidative stress (GO:0006979);; Cellular Component: plant-type cell wall (GO:0009505);; Biological Process: plant-type cell wall organization (GO:0009664);; Cellular Component: integral component of membrane (GO:0016021);; Molecular Function: heme binding …	K00430|0|pmum:103336232|K00430 peroxidase [EC:1.11.1.7] | (RefSeq) peroxidase 12	ko00940:Phenylpropanoid biosynthesis	--	--	Peroxidase	Peroxidase 12 (Precursor) OS=Arabidopsis thaliana (Mouse-ear cress) PE=1 SV=1	G	Carbohydrate transport and metabolism	PREDICTED: peroxidase 12 [Prunus mume]
F01_transcript/881	--	--	Cellular Component: nucleus (GO:0005634);; Biological Process: negative regulation of flower development (GO:0009910);; Biological Process: polarity specification of adaxial/abaxial axis (GO:0009944);; Biological Process: leaf morphogenesis (GO:0009965);; Cellular Component: integral component of membrane (GO:0016021);; Biological Process: pre-miRNA export from nucleus (GO:0035281);; Biological P…	K14289|0|vvi:100258918|K14289 exportin-5 | (RefSeq) protein HASTY 1	ko03013:RNA transport	[YU]	--	Exportin 1-like protein	Protein HASTY 1 GN=T9J14.1 OS=Arabidopsis thaliana (Mouse-ear cress) PE=1 SV=1	U	Intracellular trafficking, secretion, and vesicular transport	PREDICTED: protein HASTY 1 [Vitis vinifera]
F01_transcript/30519	--	--	Biological Process: ubiquitin-dependent protein catabolic process (GO:0006511);; Molecular Function: kinase activity (GO:0016301);; Biological Process: phosphorylation (GO:0016310);;	--	--	[O]	Posttranslational modification, protein turnover, chaperones	Skp1 family, dimerisation domain;; Skp1 family, tetramerisation domain	SKP1-like protein 1B GN=MJC20.30 OS=Arabidopsis thaliana (Mouse-ear cress) PE=1 SV=1	O	Posttranslational modification, protein turnover, chaperones	PREDICTED: SKP1-like protein 1A isoform X5 [Vitis vinifera]
F01_transcript/10776	[G]	Carbohydrate transport and metabolism	Cellular Component: plant-type vacuole membrane (GO:0009705);; Cellular Component: integral component of membrane (GO:0016021);; Molecular Function: substrate-specific transmembrane transporter activity (GO:0022891);;	--	--	[R]	General function prediction only	Sugar (and other) transporter;; Major Facilitator Superfamily	Organic cation/carnitine transporter 2 GN=YUP8H12R.2 OS=Arabidopsis thaliana (Mouse-ear cress) PE=2 SV=1	G	Carbohydrate transport and metabolism	Organic cation/carnitine transporter 3 [Theobroma cacao]
F01_transcript/2392	--	--	--	--	--	--	--	--	--	S	Function unknown	PREDICTED: microtubule-associated protein futsch [Vitis vinifera]
F01_transcript/25010	[O]	Posttranslational modification, protein turnover, chaperones	Cellular Component: cell (GO:0005623);; Molecular Function: electron carrier activity (GO:0009055);; Molecular Function: protein disulfide oxidoreductase activity (GO:0015035);; Biological Process: cell redox homeostasis (GO:0045454);; Biological Process: oxidation-reduction process (GO:0055114);;	--	--	[O]	Posttranslational modification, protein turnover, chaperones	--	Monothiol glutaredoxin-S16, chloroplastic (Precursor) GN=GRXS16 OS=Arabidopsis thaliana (Mouse-ear cress) PE=1 SV=2	O	Posttranslational modification, protein turnover, chaperones	PREDICTED: monothiol glutaredoxin-S16, chloroplastic [Vitis vinifera]
F01_transcript/11379	[T]	Signal transduction mechanisms	Molecular Function: nucleotide binding (GO:0000166);; Molecular Function: protein kinase activity (GO:0004672);; Biological Process: protein phosphorylation (GO:0006468);;	--	--	[T]	Signal transduction mechanisms	Protein kinase domain;; Protein tyrosine kinase	Mitogen-activated protein kinase kinase kinase YODA GN=YDA OS=Arabidopsis thaliana (Mouse-ear cress) PE=1 SV=1	T	Signal transduction mechanisms	PREDICTED: mitogen-activated protein kinase kinase kinase YODA-like isoform X1 [Nicotiana sylvestris]
F01_transcript/30526	--	--	Cellular Component: cytosol (GO:0005829);; Cellular Component: plasma membrane (GO:0005886);;	--	--	--	--	Peptidase inhibitor I9	Subtilisin-like protease SBT3.3 {ECO:0000303|PubMed:16193095} (Precursor) OS=Arabidopsis thaliana (Mouse-ear cress) PE=2 SV=1	S	Function unknown	PREDICTED: uncharacterized protein LOC104596920 [Nelumbo nucifera]
F01_transcript/10367	[S]	Function unknown	Molecular Function: catalytic activity (GO:0003824);;	--	--	--	--	Uncharacterised protein family (UPF0261);; Phosphoenolpyruvate hydrolase-like	--	S	Function unknown	unnamed protein product [Vitis vinifera]
F01_transcript/32719	--	--	--	--	--	--	--	--	--	S	Function unknown	hypothetical protein MYCGRDRAFT_82675 [Zymoseptoria tritici IPO323]
F01_transcript/10964	--	--	--	--	--	[L]	Replication, recombination and repair	Domain of unknown function (DUF1771);; Smr domain	Polyadenylate-binding protein-interacting protein 7 GN=CID7 OS=Arabidopsis thaliana (Mouse-ear cress) PE=1 SV=1	S	Function unknown	PREDICTED: pentatricopeptide repeat-containing protein At4g33170 [Vitis vinifera]
F01_transcript/26238	[O]	Posttranslational modification, protein turnover, chaperones	Cellular Component: membrane (GO:0016020);;	--	--	[O]	Posttranslational modification, protein turnover, chaperones	SPFH domain / Band 7 family	Prohibitin-3, mitochondrial GN=K1B16.2 OS=Arabidopsis thaliana (Mouse-ear cress) PE=1 SV=1	O	Posttranslational modification, protein turnover, chaperones	hypothetical protein AMTR_s00079p00162380 [Amborella trichopoda]
F01_transcript/8234	[E]	Amino acid transport and metabolism	Molecular Function: DNA binding (GO:0003677);; Cellular Component: nucleus (GO:0005634);; Molecular Function: methyltransferase activity (GO:0008168);; Molecular Function: oxidoreductase activity (GO:0016491);; Biological Process: histone deacetylation (GO:0016575);; Biological Process: root development (GO:0048364);; Biological Process: histone H3-K4 methylation (GO:0051568);; Biological Process…	K11450|0|pmum:103321164|K11450 lysine-specific histone demethylase 1A [EC:1.-.-.-] | (RefSeq) lysine-specific histone demethylase 1 homolog 1	--	[Q]	Secondary metabolites biosynthesis, transport and catabolism	Flavin containing amine oxidoreductase;; SWIRM domain;; NAD(P)-binding Rossmann-like domain	Lysine-specific histone demethylase 1 homolog 1 GN=F23N19.19 OS=Arabidopsis thaliana (Mouse-ear cress) PE=1 SV=1	S	Function unknown	PREDICTED: lysine-specific histone demethylase 1 homolog 1 [Nelumbo nucifera]
F01_transcript/22925	[T]	Signal transduction mechanisms	Molecular Function: protein serine/threonine kinase activity (GO:0004674);; Molecular Function: ATP binding (GO:0005524);; Biological Process: protein phosphorylation (GO:0006468);;	K03097|0|pvu:PHAVU_003G237100g|K03097 casein kinase II subunit alpha [EC:2.7.11.1] | (RefSeq) hypothetical protein	ko03008:Ribosome biogenesis in eukaryotes;ko04712:Circadian rhythm - plant	[TDK]	--	Protein kinase domain;; Protein tyrosine kinase;; Phosphotransferase enzyme family	Casein kinase II subunit alpha-1 (Precursor) GN=CKA1 OS=Arabidopsis thaliana (Mouse-ear cress) PE=1 SV=3	T	Signal transduction mechanisms	hypothetical protein PHAVU_003G237100g [Phaseolus vulgaris]
F01_transcript/4311	--	--	--	--	--	--	--	BAG domain	BAG family molecular chaperone regulator 6 GN=T3F17.11 OS=Arabidopsis thaliana (Mouse-ear cress) PE=1 SV=1	S	Function unknown	IQ domain-containing family protein [Populus trichocarpa]
F01_transcript/16806	--	--	Biological Process: vesicle-mediated transport (GO:0016192);; Molecular Function: kinase activity (GO:0016301);; Biological Process: phosphorylation (GO:0016310);; Cellular Component: intracellular membrane-bounded organelle (GO:0043231);;	--	--	[V]	Defense mechanisms	Fungal domain of unknown function (DUF1712)	--	S	Function unknown	F23A5.27 isoform 5 [Theobroma cacao]
F01_transcript/32771	[O]	Posttranslational modification, protein turnover, chaperones	Biological Process: sulfate assimilation (GO:0000103);; Cellular Component: cytoplasm (GO:0005737);; Biological Process: protein folding (GO:0006457);; Biological Process: glycerol ether metabolic process (GO:0006662);; Molecular Function: protein disulfide oxidoreductase activity (GO:0015035);; Molecular Function: oxidoreductase activity, acting on a sulfur group of donors, disulfide as acceptor…	K03671|8.72097e-66|mdm:103450001|K03671 thioredoxin 1 | (RefSeq) thioredoxin-like 3-3	--	--	--	Thioredoxin	Thioredoxin-like 3-3 OS=Oryza sativa subsp. japonica (Rice) PE=2 SV=2	O	Posttranslational modification, protein turnover, chaperones	PREDICTED: thioredoxin-like 3-3, partial [Sesamum indicum]
F01_transcript/27329	--	--	Biological Process: regulation of cyclin-dependent protein serine/threonine kinase activity (GO:0000079);; Molecular Function: kinase activity (GO:0016301);; Molecular Function: protein kinase binding (GO:0019901);;	--	--	[R]	General function prediction only	Cyclin;; Cyclin, N-terminal domain	Cyclin-P3-1 OS=Oryza sativa subsp. japonica (Rice) PE=3 SV=1	S	Function unknown	PREDICTED: cyclin-P3-1 isoform X1 [Vitis vinifera]
F01_transcript/29614	[O]	Posttranslational modification, protein turnover, chaperones	Molecular Function: ATP binding (GO:0005524);; Cellular Component: nucleus (GO:0005634);; Cellular Component: cytoplasm (GO:0005737);; Molecular Function: ligase activity (GO:0016874);; Biological Process: protein sumoylation (GO:0016925);; Molecular Function: SUMO transferase activity (GO:0019789);; Molecular Function: ubiquitin protein ligase binding (GO:0031625);; Molecular Function: ubiquitin…	K10577|9.05996e-97|cit:102623921|K10577 ubiquitin-conjugating enzyme E2 I | (RefSeq) SUMO-conjugating enzyme SCE1	ko03013:RNA transport;ko04120:Ubiquitin mediated proteolysis	[O]	Posttranslational modification, protein turnover, chaperones	Ubiquitin-conjugating enzyme	SUMO-conjugating enzyme SCE1 GN=T10K17.80 OS=Arabidopsis thaliana (Mouse-ear cress) PE=1 SV=1	O	Posttranslational modification, protein turnover, chaperones	SUMO E2 conjugating enzyme SCE1 [Nicotiana benthamiana]
F01_transcript/19700	[G]	Carbohydrate transport and metabolism	Cellular Component: cytosol (GO:0005829);; Molecular Function: beta-glucosidase activity (GO:0008422);; Biological Process: cellulose catabolic process (GO:0030245);; Molecular Function: scopolin beta-glucosidase activity (GO:0102483);; Biological Process: glycosyl compound metabolic process (GO:1901657);;	K01188|0|vvi:100241205|K01188 beta-glucosidase [EC:3.2.1.21] | (RefSeq) beta-glucosidase 42	ko00460:Cyanoamino acid metabolism;ko00500:Starch and sucrose metabolism;ko00940:Phenylpropanoid biosynthesis	[G]	Carbohydrate transport and metabolism	Glycosyl hydrolase family 1	Beta-glucosidase 42 GN=BGLU42 OS=Arabidopsis thaliana (Mouse-ear cress) PE=2 SV=1	G	Carbohydrate transport and metabolism	PREDICTED: beta-glucosidase 42 [Vitis vinifera]
F01_transcript/23643	--	--	Molecular Function: binding (GO:0005488);;	--	--	--	--	Helix-loop-helix DNA-binding domain	Transcription factor bHLH137 GN=K3K7 OS=Arabidopsis thaliana (Mouse-ear cress) PE=2 SV=1	K	Transcription	hypothetical protein PRUPE_ppa008085mg [Prunus persica]
F01_transcript/9466	[I]	Lipid transport and metabolism	Molecular Function: phospholipase D activity (GO:0004630);; Molecular Function: calcium ion binding (GO:0005509);; Cellular Component: vacuole (GO:0005773);; Cellular Component: endoplasmic reticulum (GO:0005783);; Cellular Component: plasma membrane (GO:0005886);; Cellular Component: plastid (GO:0009536);; Biological Process: phosphatidylcholine catabolic process (GO:0034638);; Molecular Functio…	--	--	[I]	Lipid transport and metabolism	Phospholipase D C terminal;; Phospholipase D Active site motif;; C2 domain;; PLD-like domain	Phospholipase D alpha 1 (Precursor) GN=PLD1 OS=Ricinus communis (Castor bean) PE=1 SV=1	I	Lipid transport and metabolism	PREDICTED: phospholipase D alpha 1 [Sesamum indicum]
F01_transcript/18689	--	--	--	--	--	--	--	FBD;; Leucine Rich Repeat;; F-box domain	F-box/FBD/LRR-repeat protein At1g16930 GN=At1g16930 OS=Arabidopsis thaliana (Mouse-ear cress) PE=2 SV=1	S	Function unknown	hypothetical protein VITISV_040899 [Vitis vinifera]
F01_transcript/25743	[P]	Inorganic ion transport and metabolism	Molecular Function: ATP binding (GO:0005524);; Cellular Component: vacuolar membrane (GO:0005774);; Cellular Component: plasma membrane (GO:0005886);; Molecular Function: ATPase-coupled phosphate ion transmembrane transporter activity (GO:0015415);; Biological Process: phosphate ion transmembrane transport (GO:0035435);;	--	--	[Q]	Secondary metabolites biosynthesis, transport and catabolism	ABC transporter;; AAA domain, putative AbiEii toxin, Type IV TA system;; Predicted ATPase of the ABC class	ABC transporter I family member 17 GN=T23K23.21 OS=Arabidopsis thaliana (Mouse-ear cress) PE=2 SV=1	P	Inorganic ion transport and metabolism	ABC transporter family protein [Hevea brasiliensis]
F01_transcript/183	[R]	General function prediction only	Biological Process: cytokinesis by cell plate formation (GO:0000911);; Biological Process: establishment of planar polarity (GO:0001736);; Molecular Function: ARF guanyl-nucleotide exchange factor activity (GO:0005086);; Cellular Component: endosome (GO:0005768);; Cellular Component: trans-Golgi network (GO:0005802);; Cellular Component: plasma membrane (GO:0005886);; Biological Process: endocyto…	--	--	[U]	Intracellular trafficking, secretion, and vesicular transport	Sec7 domain;; Guanine nucleotide exchange factor in Golgi transport N-terminal	ARF guanine-nucleotide exchange factor GNOM GN=At1g13980 OS=Arabidopsis thaliana (Mouse-ear cress) PE=1 SV=1	S	Function unknown	hypothetical protein JCGZ_15650 [Jatropha curcas]
F01_transcript/9207	--	--	Molecular Function: DNA ligase (ATP) activity (GO:0003910);; Molecular Function: mRNA guanylyltransferase activity (GO:0004484);; Molecular Function: polynucleotide 5'-phosphatase activity (GO:0004651);; Molecular Function: protein tyrosine phosphatase activity (GO:0004725);; Molecular Function: ATP binding (GO:0005524);; Cellular Component: nucleus (GO:0005634);; Biological Process: DNA ligation…	K13917|0|pper:PRUPE_ppa002348mg|K13917 mRNA-capping enzyme [EC:2.7.7.50 3.6.1.-] | (RefSeq) hypothetical protein	ko03015:mRNA surveillance pathway	[A]	RNA processing and modification	mRNA capping enzyme, catalytic domain;; mRNA capping enzyme, C-terminal domain;; Dual specificity phosphatase, catalytic domain;; ATP dependent DNA ligase domain	--	A	RNA processing and modification	hypothetical protein PRUPE_ppa002348mg [Prunus persica]
F01_transcript/32824	[J]	Translation, ribosomal structure and biogenesis	Biological Process: ribosomal small subunit assembly (GO:0000028);; Molecular Function: structural constituent of ribosome (GO:0003735);; Biological Process: translation (GO:0006412);; Cellular Component: cytosolic small ribosomal subunit (GO:0022627);; Molecular Function: metal ion binding (GO:0046872);;	K02978|1.26991e-35|crb:CARUB_v10018269mg|K02978 small subunit ribosomal protein S27e | (RefSeq) hypothetical protein	ko03010:Ribosome	[J]	Translation, ribosomal structure and biogenesis	Ribosomal protein S27	40S ribosomal protein S27-2 OS=Arabidopsis thaliana (Mouse-ear cress) PE=2 SV=2	J	Translation, ribosomal structure and biogenesis	PREDICTED: 40S ribosomal protein S27-2-like [Nelumbo nucifera]
F01_transcript/2816	[J]	Translation, ribosomal structure and biogenesis	Biological Process: mRNA splicing, via spliceosome (GO:0000398);; Molecular Function: nucleic acid binding (GO:0003676);; Cellular Component: nucleus (GO:0005634);; Biological Process: post-embryonic development (GO:0009791);; Biological Process: reproductive structure development (GO:0048608);; Biological Process: regulation of biological process (GO:0050789);;	--	--	[R]	General function prediction only	RNA recognition motif. (a.k.a. RRM, RBD, or RNP domain);; SPOC domain;; Nup53/35/40-type RNA recognition motif	Flowering time control protein FPA GN=FPA OS=Arabidopsis thaliana (Mouse-ear cress) PE=2 SV=2	S	Function unknown	RNA recognition motif-containing protein, putative isoform 1 [Theobroma cacao]
F01_transcript/4878	[G]	Carbohydrate transport and metabolism	Molecular Function: hydrolase activity, hydrolyzing O-glycosyl compounds (GO:0004553);; Biological Process: metabolic process (GO:0008152);;	--	--	[G]	Carbohydrate transport and metabolism	Glycosyl hydrolases family 35;; Beta-galactosidase, domain 2;; Beta-galactosidase jelly roll domain;; Beta-galactosidase, domain 3	Beta-galactosidase 8 (Precursor) GN=OSJNBa0052K01.15 OS=Oryza sativa subsp. japonica (Rice) PE=2 SV=1	G	Carbohydrate transport and metabolism	putative beta-galactosidase [Zymoseptoria tritici IPO323]
F01_transcript/30570	[T]	Signal transduction mechanisms	Molecular Function: phosphorylase kinase activity (GO:0004689);; Molecular Function: signal transducer activity (GO:0004871);; Molecular Function: calcium ion binding (GO:0005509);; Biological Process: detection of calcium ion (GO:0005513);; Molecular Function: protein binding (GO:0005515);; Cellular Component: nucleus (GO:0005634);; Cellular Component: cytosol (GO:0005829);; Cellular Component: …	K02183|2.78622e-77|ath:AT1G66410|K02183 calmodulin | (RefSeq) CAM4; calmodulin 4	ko04070:Phosphatidylinositol signaling system;ko04626:Plant-pathogen interaction	[T]	Signal transduction mechanisms	EF hand;; EF-hand domain pair;; EF-hand domain pair;; EF hand;; EF-hand domain;; EF-hand domain;; Cytoskeletal-regulatory complex EF hand;; Secreted protein acidic and rich in cysteine Ca binding region;; EF-hand domain;; Ca2+ insensitive EF hand	Calmodulin OS=Spinacia oleracea (Spinach) PE=1 SV=2	DTZ	--	PREDICTED: calmodulin-7 isoform X1 [Vitis vinifera]
F01_transcript/28165	--	--	Molecular Function: heat shock protein binding (GO:0031072);; Molecular Function: unfolded protein binding (GO:0051082);;	--	--	--	--	--	--	S	Function unknown	hypothetical protein L484_009641 [Morus notabilis]
F01_transcript/12369	--	--	Cellular Component: integral component of membrane (GO:0016021);;	--	--	[S]	Function unknown	Cytochrome B561, N terminal	--	S	Function unknown	hypothetical protein VITISV_033335 [Vitis vinifera]
F01_transcript/2332	--	--	Cellular Component: endosome (GO:0005768);; Biological Process: intracellular protein transport (GO:0006886);; Biological Process: vesicle docking involved in exocytosis (GO:0006904);; Biological Process: endosome organization (GO:0007032);; Biological Process: lysosome organization (GO:0007040);; Molecular Function: protein binding, bridging (GO:0030674);; Cellular Component: HOPS complex (GO:00…	K20181|0|pper:PRUPE_ppa000832mg|K20181 vacuolar protein sorting-associated protein 18 | (RefSeq) hypothetical protein	--	[U]	Intracellular trafficking, secretion, and vesicular transport	Pep3/Vps18/deep orange family	--	U	Intracellular trafficking, secretion, and vesicular transport	hypothetical protein PRUPE_ppa000832mg [Prunus persica]
F01_transcript/8128	--	--	--	K11797|0|vvi:100248563|K11797 PH-interacting protein | (RefSeq) bromodomain and WD repeat-containing protein 3	--	[R]	General function prediction only	Bromodomain	--	S	Function unknown	PREDICTED: bromodomain and WD repeat-containing protein 3 [Vitis vinifera]
F01_transcript/26201	--	--	Molecular Function: calcium ion binding (GO:0005509);; Molecular Function: calcium-dependent phospholipid binding (GO:0005544);; Cellular Component: cytosol (GO:0005829);; Cellular Component: plasma membrane (GO:0005886);; Cellular Component: plasmodesma (GO:0009506);;	--	--	[R]	General function prediction only	--	Elicitor-responsive protein 1 GN=ERG1 OS=Oryza sativa subsp. japonica (Rice) PE=2 SV=1	S	Function unknown	PREDICTED: splicing factor 3A subunit 2 isoform X2 [Vitis vinifera]
F01_transcript/22063	--	--	Cellular Component: endosome (GO:0005768);; Cellular Component: trans-Golgi network (GO:0005802);; Cellular Component: integral component of membrane (GO:0016021);;	--	--	--	--	--	--	S	Function unknown	PREDICTED: uncharacterized protein LOC104102091 isoform X1 [Nicotiana tomentosiformis]
F01_transcript/21518	[T]	Signal transduction mechanisms	Molecular Function: protein serine/threonine kinase activity (GO:0004674);; Molecular Function: ATP binding (GO:0005524);; Cellular Component: nucleus (GO:0005634);; Cellular Component: cytosol (GO:0005829);; Biological Process: sucrose metabolic process (GO:0005985);; Biological Process: unsaturated fatty acid biosynthetic process (GO:0006636);; Biological Process: response to water deprivation …	--	--	[T]	Signal transduction mechanisms	Protein kinase domain;; Protein tyrosine kinase	Serine/threonine-protein kinase SRK2I GN=MUD21.14 OS=Arabidopsis thaliana (Mouse-ear cress) PE=1 SV=1	T	Signal transduction mechanisms	PREDICTED: serine/threonine-protein kinase SAPK10-like [Sesamum indicum]
F01_transcript/9428	--	--	Cellular Component: nucleus (GO:0005634);; Biological Process: response to abscisic acid (GO:0009737);; Biological Process: seed germination (GO:0009845);; Biological Process: flower development (GO:0009908);; Biological Process: histone deacetylation (GO:0016575);; Molecular Function: isomerase activity (GO:0016853);; Biological Process: developmental vegetative growth (GO:0080186);; Biological …	--	--	[S]	Function unknown	Histone deacetylation protein Rxt3	--	S	Function unknown	hypothetical protein Csa_2G337260 [Cucumis sativus]
F01_transcript/21419	[J]	Translation, ribosomal structure and biogenesis	Molecular Function: GTP binding (GO:0005525);;	K06944|0|cit:102606985|K06944 uncharacterized protein | (RefSeq) developmentally-regulated G-protein 2	--	[T]	Signal transduction mechanisms	C-terminal region of MMR_HSR1 domain;; TGS domain;; 50S ribosome-binding GTPase;; Ferrous iron transport protein B;; Dynamin family	Developmentally-regulated G-protein 2 GN=F28P22.15 OS=Arabidopsis thaliana (Mouse-ear cress) PE=2 SV=1	S	Function unknown	hypothetical protein JCGZ_24712 [Jatropha curcas]
F01_transcript/4962	[G]	Carbohydrate transport and metabolism	Molecular Function: alpha,alpha-trehalose-phosphate synthase (UDP-forming) activity (GO:0003825);; Biological Process: trehalose biosynthetic process (GO:0005992);;	K16055|0|sly:100134910|K16055 trehalose 6-phosphate synthase/phosphatase [EC:2.4.1.15 3.1.3.12] | (RefSeq) trehalose-phosphate synthase 1	ko00500:Starch and sucrose metabolism	[G]	Carbohydrate transport and metabolism	Glycosyltransferase family 20;; Trehalose-phosphatase	Alpha,alpha-trehalose-phosphate synthase [UDP-forming] 1 GN=TPS1 OS=Arabidopsis thaliana (Mouse-ear cress) PE=1 SV=1	G	Carbohydrate transport and metabolism	trehalose-6-phosphate synthase [Camellia sinensis]
F01_transcript/10895	--	--	--	K17987|3.55251e-117|pmum:103337936|K17987 next to BRCA1 gene 1 protein | (RefSeq) protein NBR1 homolog	--	[S]	Function unknown	Ig-like domain from next to BRCA1 gene;; Zinc finger, ZZ type;; PB1 domain	--	S	Function unknown	PREDICTED: uncharacterized protein LOC103337936 isoform X2 [Prunus mume]
F01_transcript/29577	--	--	Molecular Function: DNA binding (GO:0003677);; Molecular Function: ubiquitin-protein transferase activity (GO:0004842);; Cellular Component: nucleus (GO:0005634);; Biological Process: response to osmotic stress (GO:0006970);; Molecular Function: zinc ion binding (GO:0008270);; Biological Process: response to water deprivation (GO:0009414);; Biological Process: protein autoubiquitination (GO:00518…	--	--	[R]	General function prediction only	AN1-like Zinc finger	Zinc finger A20 and AN1 domain-containing stress-associated protein 5 GN=SAP5 OS=Arabidopsis thaliana (Mouse-ear cress) PE=2 SV=1	S	Function unknown	Zinc finger A20 and AN1 domain-containing stress-associated protein 5 [Glycine soja]
F01_transcript/25340	--	--	--	--	--	--	--	Extensin-like region	--	--	--	--
F01_transcript/31521	--	--	Molecular Function: protein binding (GO:0005515);; Cellular Component: trans-Golgi network (GO:0005802);; Cellular Component: clathrin-coated pit (GO:0005905);; Biological Process: intracellular protein transport (GO:0006886);; Molecular Function: protein transporter activity (GO:0008565);; Cellular Component: AP-4 adaptor complex (GO:0030124);; Cellular Component: clathrin vesicle coat (GO:00301…	K12403|5.22398e-92|sot:102605220|K12403 AP-4 complex subunit sigma-1 | (RefSeq) AP-4 complex subunit sigma	--	[U]	Intracellular trafficking, secretion, and vesicular transport	Clathrin adaptor complex small chain	AP-4 complex subunit sigma GN=At2g19790 OS=Arabidopsis thaliana (Mouse-ear cress) PE=2 SV=1	U	Intracellular trafficking, secretion, and vesicular transport	AP-4 complex subunit sigma [Morus notabilis]
F01_transcript/20997	[J]	Translation, ribosomal structure and biogenesis	Molecular Function: organic cyclic compound binding (GO:0097159);; Molecular Function: heterocyclic compound binding (GO:1901363);;	--	--	[R]	General function prediction only	RNA recognition motif. (a.k.a. RRM, RBD, or RNP domain);; RNA recognition motif. (a.k.a. RRM, RBD, or RNP domain)	Polyadenylate-binding protein RBP45 GN=RBP45 OS=Nicotiana plumbaginifolia (Leadwort-leaved tobacco) PE=1 SV=1	S	Function unknown	PREDICTED: polyadenylate-binding protein RBP45-like [Vitis vinifera]
F01_transcript/20110	--	--	--	--	--	--	--	Neprosin;; Neprosin activation peptide	--	S	Function unknown	PREDICTED: uncharacterized protein LOC100246465 [Vitis vinifera]
F01_transcript/18805	[J]	Translation, ribosomal structure and biogenesis	Molecular Function: nucleotide binding (GO:0000166);; Molecular Function: RNA binding (GO:0003723);; Cellular Component: cytoplasm (GO:0005737);;	K13126|0|vvi:100255846|K13126 polyadenylate-binding protein | (RefSeq) polyadenylate-binding protein 2-like	ko03013:RNA transport;ko03015:mRNA surveillance pathway;ko03018:RNA degradation	[AJ]	--	RNA recognition motif. (a.k.a. RRM, RBD, or RNP domain);; Poly-adenylate binding protein, unique domain;; RNA recognition motif. (a.k.a. RRM, RBD, or RNP domain);; Occluded RNA-recognition motif;; RNA binding motif	Polyadenylate-binding protein 8 GN=PAB8 OS=Arabidopsis thaliana (Mouse-ear cress) PE=1 SV=1	S	Function unknown	PREDICTED: polyadenylate-binding protein 8 isoform X1 [Vitis vinifera]
F01_transcript/10205	[K]	Transcription	Cellular Component: membrane (GO:0016020);; Molecular Function: kinase activity (GO:0016301);; Biological Process: phosphorylation (GO:0016310);;	--	--	--	--	Leucine rich repeat;; Protein kinase domain;; Protein tyrosine kinase;; Leucine Rich repeats (2 copies);; Leucine Rich Repeat;; Leucine Rich repeat	Probable inactive leucine-rich repeat receptor-like protein kinase At3g03770 (Precursor) GN=At3g03770 OS=Arabidopsis thaliana (Mouse-ear cress) PE=2 SV=1	T	Signal transduction mechanisms	Leucine-rich repeat protein kinase family protein isoform 1 [Theobroma cacao]
F01_transcript/8784	[I]	Lipid transport and metabolism	Biological Process: long-chain fatty acid metabolic process (GO:0001676);; Molecular Function: long-chain fatty acid-CoA ligase activity (GO:0004467);;	K01897|0|pop:POPTR_0013s02220g|K01897 long-chain acyl-CoA synthetase [EC:6.2.1.3] | (RefSeq) POPTRDRAFT_570831; hypothetical protein	ko00061:Fatty acid biosynthesis;ko00071:Fatty acid degradation;ko01212:Fatty acid metabolism;ko04146:Peroxisome	[I]	Lipid transport and metabolism	AMP-binding enzyme	Long chain acyl-CoA synthetase 7, peroxisomal GN=LACS7 OS=Arabidopsis thaliana (Mouse-ear cress) PE=1 SV=2	I	Lipid transport and metabolism	PREDICTED: long chain acyl-CoA synthetase 6, peroxisomal isoform X1 [Nicotiana sylvestris]
F01_transcript/17166	[K]	Transcription	Biological Process: cytokinesis by cell plate formation (GO:0000911);; Cellular Component: nuclear envelope (GO:0005635);; Cellular Component: plasma membrane (GO:0005886);; Cellular Component: cell plate (GO:0009504);; Cellular Component: chloroplast (GO:0009507);; Cellular Component: cell division site (GO:0032153);;	K14319|0|vvi:100244330|K14319 Ran GTPase-activating protein 1 | (RefSeq) RAN GTPase-activating protein 1	ko03013:RNA transport	[AYT]	--	Leucine Rich repeat;; Leucine Rich repeats (2 copies);; Leucine Rich Repeat;; WPP domain	RAN GTPase-activating protein 1 GN=RANGAP1 OS=Arabidopsis thaliana (Mouse-ear cress) PE=1 SV=1	U	Intracellular trafficking, secretion, and vesicular transport	hypothetical protein VITISV_039541 [Vitis vinifera]
F01_transcript/15695	--	--	Cellular Component: endosome (GO:0005768);; Cellular Component: vacuolar membrane (GO:0005774);; Cellular Component: trans-Golgi network (GO:0005802);; Molecular Function: S-adenosylmethionine-dependent methyltransferase activity (GO:0008757);; Cellular Component: integral component of membrane (GO:0016021);; Biological Process: methylation (GO:0032259);; Biological Process: cell wall pectin meta…	--	--	--	--	Putative S-adenosyl-L-methionine-dependent methyltransferase;; Methyltransferase domain	Probable methyltransferase PMT13 GN=At4g00740 OS=Arabidopsis thaliana (Mouse-ear cress) PE=2 SV=1	S	Function unknown	hypothetical protein PRUPE_ppa003145mg [Prunus persica]
F01_transcript/7221	--	--	Molecular Function: ribonuclease P activity (GO:0004526);; Cellular Component: nucleolar ribonuclease P complex (GO:0005655);; Biological Process: RNA phosphodiester bond hydrolysis, endonucleolytic (GO:0090502);;	--	--	--	--	--	--	S	Function unknown	PREDICTED: putative leucine-rich repeat-containing protein DDB_G0290503 [Vitis vinifera]
F01_transcript/7858	--	--	Molecular Function: inositol hexakisphosphate binding (GO:0000822);; Biological Process: auxin-activated signaling pathway (GO:0009734);;	--	--	[R]	General function prediction only	--	Transport inhibitor response 1-like protein GN=At5g49980 OS=Arabidopsis thaliana (Mouse-ear cress) PE=2 SV=1	S	Function unknown	PREDICTED: transport inhibitor response 1-like protein [Vitis vinifera]
F01_transcript/21541	--	--	Cellular Component: integral component of membrane (GO:0016021);;	--	--	[T]	Signal transduction mechanisms	Lung seven transmembrane receptor	--	S	Function unknown	PREDICTED: protein GPR107 [Cucumis melo]
F01_transcript/2284	--	--	--	--	--	[T]	Signal transduction mechanisms	NB-ARC domain	Disease resistance protein RFL1 GN=RFL1 OS=Arabidopsis thaliana (Mouse-ear cress) PE=3 SV=2	S	Function unknown	NB-ARC domain-containing disease resistance protein, putative [Theobroma cacao]
F01_transcript/1529	--	--	Cellular Component: nucleus (GO:0005634);; Cellular Component: cytoplasm (GO:0005737);; Molecular Function: ligase activity (GO:0016874);;	--	--	--	--	Armadillo/beta-catenin-like repeat;; F-box-like;; F-box domain	Protein ARABIDILLO 1 GN=FBX5 OS=Arabidopsis thaliana (Mouse-ear cress) PE=1 SV=1	S	Function unknown	hypothetical protein CICLE_v10018755mg [Citrus clementina]
F01_transcript/2608	[K]	Transcription	--	--	--	[T]	Signal transduction mechanisms	NB-ARC domain;; Leucine Rich repeats (2 copies);; Leucine rich repeat	Disease resistance protein At4g27190 GN=At4g27190 OS=Arabidopsis thaliana (Mouse-ear cress) PE=2 SV=1	S	Function unknown	NB-ARC domain-containing disease resistance protein, putative isoform 1 [Theobroma cacao]
F01_transcript/7942	--	--	Biological Process: protein polyubiquitination (GO:0000209);; Cellular Component: nucleus (GO:0005634);; Cellular Component: cytosol (GO:0005829);; Biological Process: DNA repair (GO:0006281);; Biological Process: hormone-mediated signaling pathway (GO:0009755);; Biological Process: flower development (GO:0009908);; Biological Process: negative regulation of photomorphogenesis (GO:0010100);; Biol…	K10609|0|vvi:100233055|K10609 cullin 4 | (RefSeq) CUL4; cullin-4	ko03420:Nucleotide excision repair;ko04120:Ubiquitin mediated proteolysis	[D]	Cell cycle control, cell division, chromosome partitioning	Cullin family;; Cullin protein neddylation domain	Cullin-4 GN=CUL4 OS=Arabidopsis thaliana (Mouse-ear cress) PE=1 SV=1	O	Posttranslational modification, protein turnover, chaperones	PREDICTED: cullin-4 [Vitis vinifera]
F01_transcript/30714	--	--	Molecular Function: zinc ion binding (GO:0008270);; Molecular Function: NEDD8 transferase activity (GO:0019788);; Biological Process: SCF-dependent proteasomal ubiquitin-dependent protein catabolic process (GO:0031146);; Cellular Component: Cul2-RING ubiquitin ligase complex (GO:0031462);; Cellular Component: Cul3-RING ubiquitin ligase complex (GO:0031463);; Cellular Component: Cul7-RING ubiquiti…	K03868|6.94425e-72|gmx:100526919|K03868 RING-box protein 1 | (RefSeq) uncharacterized LOC100526919	ko03420:Nucleotide excision repair;ko04120:Ubiquitin mediated proteolysis;ko04141:Protein processing in endoplasmic reticulum	[O]	Posttranslational modification, protein turnover, chaperones	RING-H2 zinc finger domain;; Anaphase-promoting complex subunit 11 RING-H2 finger;; Ring finger domain	RING-box protein 1a GN=F7C8.160 OS=Arabidopsis thaliana (Mouse-ear cress) PE=1 SV=1	O	Posttranslational modification, protein turnover, chaperones	uncharacterized protein LOC100526919 [Glycine max]
F01_transcript/4003	--	--	Molecular Function: structural constituent of ribosome (GO:0003735);; Molecular Function: calcium ion binding (GO:0005509);; Biological Process: translation (GO:0006412);; Cellular Component: chloroplast envelope (GO:0009941);; Cellular Component: integral component of membrane (GO:0016021);; Biological Process: transmembrane transport (GO:0055085);;	--	--	[C]	Energy production and conversion	Mitochondrial carrier protein;; EF-hand domain	Probable S-adenosylmethionine carrier 2, chloroplastic (Precursor) GN=SAMC2 OS=Arabidopsis thaliana (Mouse-ear cress) PE=2 SV=1	S	Function unknown	Mitochondrial substrate carrier family protein isoform 1 [Theobroma cacao]
F01_transcript/16408	[E]	Amino acid transport and metabolism	Molecular Function: transporter activity (GO:0005215);; Biological Process: transport (GO:0006810);; Cellular Component: integral component of membrane (GO:0016021);;	--	--	[E]	Amino acid transport and metabolism	POT family;; POT family	Protein NRT1/ PTR FAMILY 5.3 GN=MCL19.9 OS=Arabidopsis thaliana (Mouse-ear cress) PE=2 SV=1	E	Amino acid transport and metabolism	PREDICTED: protein NRT1/ PTR FAMILY 5.2-like [Prunus mume]
F01_transcript/968	[T]	Signal transduction mechanisms	Molecular Function: protein serine/threonine kinase activity (GO:0004674);; Molecular Function: ATP binding (GO:0005524);; Cellular Component: plasma membrane (GO:0005886);; Biological Process: protein phosphorylation (GO:0006468);;	--	--	[T]	Signal transduction mechanisms	Protein kinase domain;; Protein tyrosine kinase;; Protein tyrosine kinase;; Protein kinase domain	Serine/threonine-protein kinase At5g01020 GN=At5g01020 OS=Arabidopsis thaliana (Mouse-ear cress) PE=1 SV=1	T	Signal transduction mechanisms	hypothetical protein EUGRSUZ_A00879 [Eucalyptus grandis]
F01_transcript/20723	[G]	Carbohydrate transport and metabolism	Molecular Function: sugar:proton symporter activity (GO:0005351);; Molecular Function: glucose transmembrane transporter activity (GO:0005355);; Cellular Component: integral component of plasma membrane (GO:0005887);; Biological Process: zinc II ion transport (GO:0006829);; Cellular Component: chloroplast (GO:0009507);; Cellular Component: plant-type vacuole membrane (GO:0009705);; Biological Pro…	K08145|0|vvi:100263109|K08145 MFS transporter, SP family, solute carrier family 2 (facilitated glucose transporter), member 8 | (RefSeq) sugar transporter ERD6-like 7	--	[R]	General function prediction only	Sugar (and other) transporter;; Major Facilitator Superfamily	Sugar transporter ERD6-like 7 GN=At2g48020 OS=Arabidopsis thaliana (Mouse-ear cress) PE=2 SV=2	G	Carbohydrate transport and metabolism	PREDICTED: sugar transporter ERD6-like 7 [Vitis vinifera]
F01_transcript/33594	--	--	Molecular Function: cytochrome-c oxidase activity (GO:0004129);; Cellular Component: mitochondrial respiratory chain complex IV (GO:0005751);; Biological Process: mitochondrial electron transport, cytochrome c to oxygen (GO:0006123);; Biological Process: aerobic respiration (GO:0009060);; Cellular Component: integral component of membrane (GO:0016021);;	--	--	--	--	--	Cytochrome c oxidase subunit 5C GN=COX5C OS=Hordeum vulgare (Barley) PE=3 SV=3	O	Posttranslational modification, protein turnover, chaperones	PREDICTED: cytochrome c oxidase subunit 5C isoform X1 [Elaeis guineensis]
F01_transcript/16029	--	--	--	--	--	--	--	No apical meristem (NAM) protein	NAC domain-containing protein 78 GN=T32M21.10 OS=Arabidopsis thaliana (Mouse-ear cress) PE=2 SV=2	S	Function unknown	PREDICTED: NAC domain-containing protein 78-like isoform X1 [Nelumbo nucifera]
F01_transcript/17087	--	--	Cellular Component: plasma membrane (GO:0005886);;	--	--	--	--	--	Uncharacterized protein At1g76660 GN=At1g76660 OS=Arabidopsis thaliana (Mouse-ear cress) PE=2 SV=1	S	Function unknown	PREDICTED: uncharacterized protein At1g76660 isoform X2 [Vitis vinifera]
F01_transcript/31980	--	--	Cellular Component: integral component of membrane (GO:0016021);;	--	--	[S]	Function unknown	Uncharacterised protein family (UPF0220)	--	S	Function unknown	PREDICTED: transmembrane protein 50 homolog [Citrus sinensis]
F01_transcript/10905	[T]	Signal transduction mechanisms	Molecular Function: intracellular cyclic nucleotide activated cation channel activity (GO:0005221);; Molecular Function: inward rectifier potassium channel activity (GO:0005242);; Molecular Function: calmodulin binding (GO:0005516);; Cellular Component: integral component of plasma membrane (GO:0005887);; Biological Process: potassium ion transport (GO:0006813);; Biological Process: calcium ion t…	K05391|0|ath:AT5G53130|K05391 cyclic nucleotide gated channel, other eukaryote | (RefSeq) CNGC1; cyclic nucleotide gated channel 1	ko04626:Plant-pathogen interaction	[PT]	--	Ion transport protein;; Cyclic nucleotide-binding domain;; Ion transport protein	Cyclic nucleotide-gated ion channel 1 GN=CNGC1 OS=Arabidopsis thaliana (Mouse-ear cress) PE=1 SV=1	U	Intracellular trafficking, secretion, and vesicular transport	PREDICTED: cyclic nucleotide-gated ion channel 1-like [Sesamum indicum]
F01_transcript/16050	--	--	--	--	--	--	--	F-box domain;; F-box-like	F-box protein At2g32560 GN=At2g32560 OS=Arabidopsis thaliana (Mouse-ear cress) PE=2 SV=1	S	Function unknown	PREDICTED: F-box protein At2g32560-like [Sesamum indicum]
F01_transcript/2125	--	--	Biological Process: nuclear-transcribed mRNA catabolic process (GO:0000956);; Molecular Function: exonuclease activity (GO:0004527);; Biological Process: heat acclimation (GO:0010286);; Cellular Component: cytoplasmic ribonucleoprotein granule (GO:0036464);; Biological Process: single-organism cellular process (GO:0044763);; Biological Process: single-organism developmental process (GO:0044767);;…	K20553|0|vvi:100253751|K20553 5'-3' exoribonuclease 4 [EC:3.1.13.-] | (RefSeq) 5'-3' exoribonuclease 4	--	[LA]	--	XRN 5'-3' exonuclease N-terminus;; Zinc knuckle	5&apos;-3&apos; exoribonuclease 4 GN=F20D21.30 OS=Arabidopsis thaliana (Mouse-ear cress) PE=2 SV=1	ADL	--	PREDICTED: 5&apos;-3&apos; exoribonuclease 4 [Vitis vinifera]
F01_transcript/24534	[O]	Posttranslational modification, protein turnover, chaperones	Molecular Function: protein disulfide isomerase activity (GO:0003756);; Cellular Component: endoplasmic reticulum lumen (GO:0005788);; Biological Process: protein folding (GO:0006457);; Cellular Component: integral component of membrane (GO:0016021);; Molecular Function: transferase activity, transferring glycosyl groups (GO:0016757);; Biological Process: response to endoplasmic reticulum stress …	K09580|7.19858e-157|vvi:100259138|K09580 protein disulfide-isomerase A1 [EC:5.3.4.1] | (RefSeq) protein disulfide-isomerase	ko04141:Protein processing in endoplasmic reticulum	[O]	Posttranslational modification, protein turnover, chaperones	Thioredoxin;; Thioredoxin-like domain;; Thioredoxin-like	Protein disulfide-isomerase (Precursor) OS=Ricinus communis (Castor bean) PE=2 SV=1	O	Posttranslational modification, protein turnover, chaperones	PREDICTED: protein disulfide-isomerase [Vitis vinifera]
F01_transcript/27068	--	--	Biological Process: response to stress (GO:0006950);;	--	--	--	--	--	--	S	Function unknown	PREDICTED: uncharacterized protein LOC104219407 [Nicotiana sylvestris]
F01_transcript/31834	--	--	Biological Process: maturation of LSU-rRNA from tricistronic rRNA transcript (SSU-rRNA, 5.8S rRNA, LSU-rRNA) (GO:0000463);; Molecular Function: mRNA binding (GO:0003729);; Molecular Function: structural constituent of ribosome (GO:0003735);; Biological Process: translation (GO:0006412);; Cellular Component: cytosolic large ribosomal subunit (GO:0022625);;	K02918|1.66079e-41|vvi:100265729|K02918 large subunit ribosomal protein L35e | (RefSeq) 60S ribosomal protein L35	ko03010:Ribosome	[J]	Translation, ribosomal structure and biogenesis	--	60S ribosomal protein L35 GN=RPL35 OS=Euphorbia esula (Leafy spurge) PE=2 SV=1	J	Translation, ribosomal structure and biogenesis	PREDICTED: 60S ribosomal protein L35 [Vitis vinifera]
F01_transcript/7155	[GER]	--	Cellular Component: plasma membrane (GO:0005886);; Cellular Component: integral component of membrane (GO:0016021);; Molecular Function: transmembrane transporter activity (GO:0022857);; Biological Process: transmembrane transport (GO:0055085);;	--	--	--	--	EamA-like transporter family	WAT1-related protein At3g30340 GN=At3g30340 OS=Arabidopsis thaliana (Mouse-ear cress) PE=2 SV=1	S	Function unknown	Nodulin MtN21 /EamA-like transporter family protein [Theobroma cacao]
F01_transcript/14612	[I]	Lipid transport and metabolism	Molecular Function: fatty-acyl-CoA binding (GO:0000062);; Molecular Function: acyl-CoA dehydrogenase activity (GO:0003995);; Molecular Function: acyl-CoA oxidase activity (GO:0003997);; Cellular Component: peroxisome (GO:0005777);; Molecular Function: electron carrier activity (GO:0009055);; Biological Process: fatty acid beta-oxidation using acyl-CoA dehydrogenase (GO:0033539);; Molecular Functi…	K00232|0|vvi:100257524|K00232 acyl-CoA oxidase [EC:1.3.3.6] | (RefSeq) acyl-coenzyme A oxidase 3, peroxisomal	ko00071:Fatty acid degradation;ko00592:alpha-Linolenic acid metabolism;ko01040:Biosynthesis of unsaturated fatty acids;ko01212:Fatty acid metabolism;ko04146:Peroxisome	[IQ]	--	Acyl-CoA oxidase;; Acyl-CoA dehydrogenase, middle domain;; Acyl-CoA dehydrogenase, C-terminal domain	Acyl-coenzyme A oxidase 3, peroxisomal (Precursor) OS=Arabidopsis thaliana (Mouse-ear cress) PE=1 SV=1	I	Lipid transport and metabolism	PREDICTED: acyl-coenzyme A oxidase 3, peroxisomal [Vitis vinifera]
F01_transcript/11327	[L]	Replication, recombination and repair	Cellular Component: nuclear chromatin (GO:0000790);; Cellular Component: synaptonemal complex (GO:0000795);; Molecular Function: single-stranded DNA binding (GO:0003697);; Molecular Function: ATP binding (GO:0005524);; Cellular Component: chiasma (GO:0005712);; Biological Process: mismatch repair (GO:0006298);; Biological Process: mitotic recombination (GO:0006312);; Biological Process: pollen de…	K08734|0|tcc:TCM_036511|K08734 DNA mismatch repair protein MLH1 | (RefSeq) MUTL isoform 1	ko03430:Mismatch repair	[L]	Replication, recombination and repair	DNA mismatch repair protein Mlh1 C-terminus;; DNA mismatch repair protein, C-terminal domain;; Histidine kinase-, DNA gyrase B-, and HSP90-like ATPase;; Histidine kinase-, DNA gyrase B-, and HSP90-like ATPase	DNA mismatch repair protein MLH1 GN=MLH1 OS=Arabidopsis thaliana (Mouse-ear cress) PE=2 SV=1	L	Replication, recombination and repair	MUTL isoform 1 [Theobroma cacao]
F01_transcript/10447	[M]	Cell wall/membrane/envelope biogenesis	--	K08853|0|pmum:103330508|K08853 AP2-associated kinase [EC:2.7.11.1] | (RefSeq) AP2-associated protein kinase 1	--	[T]	Signal transduction mechanisms	Protein kinase domain;; Protein tyrosine kinase	CBL-interacting protein kinase 22 GN=OSJNBa0049D13.5 OS=Oryza sativa subsp. japonica (Rice) PE=2 SV=1	T	Signal transduction mechanisms	PREDICTED: probable serine/threonine-protein kinase DDB_G0276461 isoform X1 [Vitis vinifera]
F01_transcript/1018	--	--	--	K17398|0|cit:102607628|K17398 DNA (cytosine-5)-methyltransferase 3A [EC:2.1.1.37] | (RefSeq) uncharacterized LOC102607628	ko00270:Cysteine and methionine metabolism	--	--	PWWP domain	--	S	Function unknown	hypothetical protein CICLE_v10000070mg [Citrus clementina]
F01_transcript/4238	[G]	Carbohydrate transport and metabolism	Biological Process: maltose metabolic process (GO:0000023);; Molecular Function: alpha-1,4-glucosidase activity (GO:0004558);; Cellular Component: chloroplast (GO:0009507);; Molecular Function: carbohydrate binding (GO:0030246);; Molecular Function: maltose alpha-glucosidase activity (GO:0032450);;	--	--	[GMO]	--	Glycosyl hydrolases family 31;; Galactose mutarotase-like;; Domain of unknown function (DUF5110)	Probable glucan 1,3-alpha-glucosidase (Precursor) GN=MGI19.5 OS=Arabidopsis thaliana (Mouse-ear cress) PE=1 SV=1	G	Carbohydrate transport and metabolism	PREDICTED: neutral alpha-glucosidase C-like isoform X1 [Vitis vinifera]
F01_transcript/13037	[E]	Amino acid transport and metabolism	Molecular Function: metalloendopeptidase activity (GO:0004222);; Biological Process: proteolysis (GO:0006508);; Biological Process: peptide metabolic process (GO:0006518);; Cellular Component: chloroplast (GO:0009507);; Cellular Component: integral component of membrane (GO:0016021);; Molecular Function: metal ion binding (GO:0046872);;	K01414|0|cit:102622997|K01414 oligopeptidase A [EC:3.4.24.70] | (RefSeq) probable cytosolic oligopeptidase A	--	[O]	Posttranslational modification, protein turnover, chaperones	Peptidase family M3	Organellar oligopeptidase A, chloroplastic/mitochondrial (Precursor) GN=K21L13.14 OS=Arabidopsis thaliana (Mouse-ear cress) PE=1 SV=1	E	Amino acid transport and metabolism	unnamed protein product [Coffea canephora]
F01_transcript/32933	[J]	Translation, ribosomal structure and biogenesis	Molecular Function: structural constituent of ribosome (GO:0003735);; Biological Process: translation (GO:0006412);; Molecular Function: rRNA binding (GO:0019843);; Cellular Component: cytosolic large ribosomal subunit (GO:0022625);; Molecular Function: metal ion binding (GO:0046872);;	K02922|5.89329e-57|pper:PRUPE_ppa013930mg|K02922 large subunit ribosomal protein L37e | (RefSeq) hypothetical protein	ko03010:Ribosome	[J]	Translation, ribosomal structure and biogenesis	Ribosomal protein L37e	60S ribosomal protein L37-3 GN=RPL37C OS=Arabidopsis thaliana (Mouse-ear cress) PE=3 SV=1	J	Translation, ribosomal structure and biogenesis	hypothetical protein PRUPE_ppa013930mg [Prunus persica]
F01_transcript/18432	--	--	--	--	--	[S]	Function unknown	Ras-induced vulval development antagonist	--	S	Function unknown	unnamed protein product [Vitis vinifera]
F01_transcript/17452	[G]	Carbohydrate transport and metabolism	Molecular Function: glucose-6-phosphate dehydrogenase activity (GO:0004345);; Biological Process: glucose metabolic process (GO:0006006);; Biological Process: pentose-phosphate shunt (GO:0006098);; Molecular Function: NADP binding (GO:0050661);; Biological Process: oxidation-reduction process (GO:0055114);;	K00036|0|cmo:103486121|K00036 glucose-6-phosphate 1-dehydrogenase [EC:1.1.1.49 1.1.1.363] | (RefSeq) glucose-6-phosphate 1-dehydrogenase, cytoplasmic isoform	ko00030:Pentose phosphate pathway;ko00480:Glutathione metabolism;ko01200:Carbon metabolism	[G]	Carbohydrate transport and metabolism	Glucose-6-phosphate dehydrogenase, C-terminal domain;; Glucose-6-phosphate dehydrogenase, NAD binding domain	Glucose-6-phosphate 1-dehydrogenase, cytoplasmic isoform GN=G6PDH OS=Solanum tuberosum (Potato) PE=2 SV=1	G	Carbohydrate transport and metabolism	G6PD1 [Actinidia chinensis]
F01_transcript/7080	[P]	Inorganic ion transport and metabolism	Cellular Component: plasma membrane (GO:0005886);; Molecular Function: potassium ion transmembrane transporter activity (GO:0015079);; Cellular Component: integral component of membrane (GO:0016021);; Biological Process: potassium ion transmembrane transport (GO:0071805);;	K03549|0|cit:102621219|K03549 KUP system potassium uptake protein | (RefSeq) potassium transporter 2	--	--	--	K+ potassium transporter	Potassium transporter 2 GN=T2P4.11 OS=Arabidopsis thaliana (Mouse-ear cress) PE=1 SV=2	P	Inorganic ion transport and metabolism	PREDICTED: KUP2 isoform X1 [Vitis vinifera]
F01_transcript/26010	--	--	Molecular Function: DNA binding (GO:0003677);; Molecular Function: transcription factor activity, sequence-specific DNA binding (GO:0003700);; Cellular Component: nucleus (GO:0005634);; Biological Process: regulation of transcription, DNA-templated (GO:0006355);; Biological Process: response to stimulus (GO:0050896);;	K09286|3.45751e-23|sot:102602477|K09286 EREBP-like factor | (RefSeq) ethylene-responsive transcription factor 3-like	--	--	--	AP2 domain	Ethylene-responsive transcription factor 3 GN=ERF3 OS=Nicotiana tabacum (Common tobacco) PE=2 SV=1	K	Transcription	ethylene response factor 9 [Actinidia deliciosa]
F01_transcript/20519	--	--	--	K13151|0|vvi:100249176|K13151 snurportin-1 | (RefSeq) snurportin-1	ko03013:RNA transport	[A]	RNA processing and modification	--	--	U	Intracellular trafficking, secretion, and vesicular transport	PREDICTED: snurportin-1 [Vitis vinifera]
F01_transcript/33821	--	--	--	--	--	--	--	--	--	S	Function unknown	hypothetical protein PRUPE_ppa019589mg [Prunus persica]
F01_transcript/575	--	--	--	--	--	--	--	C2 domain of PTEN tumour-suppressor protein;; Formin Homology 2 Domain;; Formin Homology 2 Domain	Formin-like protein 14 GN=FH14 OS=Arabidopsis thaliana (Mouse-ear cress) PE=3 SV=3	S	Function unknown	PREDICTED: formin-like protein 14 [Nicotiana tomentosiformis]
F01_transcript/22174	--	--	Cellular Component: proteasome complex (GO:0000502);; Cellular Component: nucleus (GO:0005634);; Biological Process: ethylene-activated signaling pathway (GO:0009873);; Biological Process: poly(A)+ mRNA export from nucleus (GO:0016973);; Biological Process: root development (GO:0048364);;	--	--	[D]	Cell cycle control, cell division, chromosome partitioning	PCI domain	--	L	Replication, recombination and repair	hypothetical protein JCGZ_07397 [Jatropha curcas]
F01_transcript/6365	[T]	Signal transduction mechanisms	Molecular Function: signal transducer, downstream of receptor, with serine/threonine kinase activity (GO:0004702);; Molecular Function: ATP binding (GO:0005524);; Cellular Component: cytoplasm (GO:0005737);; Biological Process: signal transduction by protein phosphorylation (GO:0023014);;	--	--	[T]	Signal transduction mechanisms	Protein kinase domain;; Protein tyrosine kinase	Mitogen-activated protein kinase kinase kinase YODA GN=YDA OS=Arabidopsis thaliana (Mouse-ear cress) PE=1 SV=1	T	Signal transduction mechanisms	PREDICTED: mitogen-activated protein kinase kinase kinase YODA isoform X1 [Vitis vinifera]
F01_transcript/26295	[E]	Amino acid transport and metabolism	Biological Process: tryptophan biosynthetic process (GO:0000162);; Molecular Function: tryptophan synthase activity (GO:0004834);; Cellular Component: chloroplast (GO:0009507);; Molecular Function: pyridoxal phosphate binding (GO:0030170);;	--	--	[E]	Amino acid transport and metabolism	Tryptophan synthase alpha chain;; Histidine biosynthesis protein	Tryptophan synthase alpha chain, chloroplastic (Precursor) GN=T14E10.210 OS=Arabidopsis thaliana (Mouse-ear cress) PE=1 SV=1	E	Amino acid transport and metabolism	unknown [Lotus japonicus]
F01_transcript/30455	--	--	Cellular Component: ribosome (GO:0005840);; Cellular Component: membrane (GO:0016020);;	K02882|1.20142e-22|vvi:100260572|K02882 large subunit ribosomal protein L18Ae | (RefSeq) 60S ribosomal protein L18a-like	ko03010:Ribosome	--	--	--	60S ribosomal protein L18a-like protein GN=At1g29970 OS=Arabidopsis thaliana (Mouse-ear cress) PE=2 SV=2	S	Function unknown	PREDICTED: 60S ribosomal protein L18a-like protein [Nelumbo nucifera]
F01_transcript/28343	--	--	Cellular Component: vacuolar membrane (GO:0005774);; Cellular Component: endoplasmic reticulum (GO:0005783);; Biological Process: intracellular protein transport (GO:0006886);; Cellular Component: plasmodesma (GO:0009506);; Cellular Component: integral component of membrane (GO:0016021);;	K14009|1.86141e-55|vvi:100265893|K14009 B-cell receptor-associated protein 31 | (RefSeq) B-cell receptor-associated protein 31	ko04141:Protein processing in endoplasmic reticulum	[V]	Defense mechanisms	--	--	S	Function unknown	PREDICTED: B-cell receptor-associated protein 31 [Vitis vinifera]
F01_transcript/20402	[G]	Carbohydrate transport and metabolism	Biological Process: glyoxylate cycle (GO:0006097);; Cellular Component: chloroplast (GO:0009507);; Molecular Function: lyase activity (GO:0016829);; Molecular Function: transferase activity, transferring acyl groups, acyl groups converted into alkyl on transfer (GO:0046912);;	--	--	[C]	Energy production and conversion	Phosphoenolpyruvate phosphomutase;; Isocitrate lyase family	Carboxyvinyl-carboxyphosphonate phosphorylmutase, chloroplastic (Precursor) GN=At1g77060 OS=Arabidopsis thaliana (Mouse-ear cress) PE=2 SV=2	G	Carbohydrate transport and metabolism	Phosphoenolpyruvate carboxylase family protein isoform 2 [Theobroma cacao]
F01_transcript/31772	--	--	Cellular Component: integral component of membrane (GO:0016021);;	--	--	--	--	--	--	S	Function unknown	unnamed protein product [Coffea canephora]
F01_transcript/3692	[C]	Energy production and conversion	Cellular Component: cytosol (GO:0005829);; Biological Process: tricarboxylic acid cycle (GO:0006099);; Molecular Function: phosphoenolpyruvate carboxylase activity (GO:0008964);; Cellular Component: chloroplast (GO:0009507);; Biological Process: carbon fixation (GO:0015977);; Molecular Function: 2-alkenal reductase [NAD(P)] activity (GO:0032440);; Cellular Component: apoplast (GO:0048046);; Biolo…	K01595|0|tcc:TCM_031773|K01595 phosphoenolpyruvate carboxylase [EC:4.1.1.31] | (RefSeq) Phosphoenolpyruvate carboxylase 3 isoform 1	ko00620:Pyruvate metabolism;ko00710:Carbon fixation in photosynthetic organisms;ko01200:Carbon metabolism	--	--	Phosphoenolpyruvate carboxylase	Phosphoenolpyruvate carboxylase 2 GN=PPCC OS=Flaveria trinervia (Clustered yellowtops) PE=1 SV=1	C	Energy production and conversion	Phosphoenolpyruvate carboxylase 3 isoform 1 [Theobroma cacao]
F01_transcript/265	--	--	--	--	--	--	--	--	--	S	Function unknown	PREDICTED: uncharacterized protein LOC100252053 isoform X1 [Vitis vinifera]
F01_transcript/6840	--	--	--	--	--	--	--	--	Methyl-CpG-binding domain-containing protein 8 GN=MBD8 OS=Arabidopsis thaliana (Mouse-ear cress) PE=2 SV=1	S	Function unknown	PREDICTED: uncharacterized protein LOC100260704 isoform X1 [Vitis vinifera]
F01_transcript/10972	--	--	--	--	--	[R]	General function prediction only	UBX domain	--	S	Function unknown	unnamed protein product [Vitis vinifera]
F01_transcript/13997	--	--	Cellular Component: ubiquitin ligase complex (GO:0000151);; Biological Process: protein polyubiquitination (GO:0000209);; Cellular Component: cytoplasm (GO:0005737);; Molecular Function: zinc ion binding (GO:0008270);; Molecular Function: ubiquitin conjugating enzyme binding (GO:0031624);; Biological Process: positive regulation of proteasomal ubiquitin-dependent protein catabolic process (GO:003…	K11968|0|vvi:100257000|K11968 ariadne-1 [EC:2.3.2.27] | (RefSeq) probable E3 ubiquitin-protein ligase ARI8	--	[O]	Posttranslational modification, protein turnover, chaperones	IBR domain, a half RING-finger domain	Probable E3 ubiquitin-protein ligase ARI7 GN=ARI7 OS=Arabidopsis thaliana (Mouse-ear cress) PE=2 SV=1	O	Posttranslational modification, protein turnover, chaperones	PREDICTED: probable E3 ubiquitin-protein ligase ARI8 isoform X2 [Vitis vinifera]
F01_transcript/12478	--	--	Cellular Component: intracellular part (GO:0044424);;	--	--	--	--	Protein of unknown function (DUF4005)	Protein IQ-DOMAIN 32 GN=IQD32 OS=Arabidopsis thaliana (Mouse-ear cress) PE=1 SV=3	S	Function unknown	PREDICTED: protein IQ-DOMAIN 32 isoform X1 [Vitis vinifera]
F01_transcript/1356	--	--	Molecular Function: DNA binding (GO:0003677);; Cellular Component: nucleus (GO:0005634);; Cellular Component: integral component of membrane (GO:0016021);;	--	--	--	--	SBP domain	Squamosa promoter-binding-like protein 1 GN=F14M4.9/F14M4.10 OS=Arabidopsis thaliana (Mouse-ear cress) PE=1 SV=2	S	Function unknown	PREDICTED: squamosa promoter-binding-like protein 1 [Vitis vinifera]
F01_transcript/16284	--	--	Cellular Component: plasma membrane (GO:0005886);;	--	--	--	--	IQ calmodulin-binding motif	Protein IQ-DOMAIN 1 GN=IQD1 OS=Arabidopsis thaliana (Mouse-ear cress) PE=1 SV=1	S	Function unknown	PREDICTED: protein IQ-DOMAIN 1 isoform X2 [Vitis vinifera]
F01_transcript/21232	[E]	Amino acid transport and metabolism	Biological Process: selenium compound metabolic process (GO:0001887);; Biological Process: cysteine metabolic process (GO:0006534);; Molecular Function: selenocysteine lyase activity (GO:0009000);; Cellular Component: chloroplast (GO:0009507);; Biological Process: response to selenium ion (GO:0010269);; Biological Process: iron incorporation into metallo-sulfur cluster (GO:0018283);; Molecular Fu…	K11717|0|tcc:TCM_040966|K11717 cysteine desulfurase / selenocysteine lyase [EC:2.8.1.7 4.4.1.16] | (RefSeq) Chloroplastic NIFS-like cysteine desulfurase isoform 1	ko00450:Selenocompound metabolism	[E]	Amino acid transport and metabolism	Aminotransferase class-V;; Cys/Met metabolism PLP-dependent enzyme	Cysteine desulfurase 2, chloroplastic (Precursor) GN=T27G7.17 OS=Arabidopsis thaliana (Mouse-ear cress) PE=1 SV=1	E	Amino acid transport and metabolism	Chloroplastic NIFS-like cysteine desulfurase isoform 1 [Theobroma cacao]
F01_transcript/21993	--	--	Molecular Function: DNA binding (GO:0003677);; Molecular Function: transcription factor activity, sequence-specific DNA binding (GO:0003700);; Cellular Component: nucleus (GO:0005634);; Biological Process: regulation of transcription, DNA-templated (GO:0006355);;	K09286|1.50349e-115|tcc:TCM_029232|K09286 EREBP-like factor | (RefSeq) Transcription factor JERF1, putative isoform 1	--	--	--	AP2 domain	Ethylene-responsive transcription factor RAP2-12 GN=T18A20.14 OS=Arabidopsis thaliana (Mouse-ear cress) PE=1 SV=1	K	Transcription	ethylene response factor 5 [Actinidia deliciosa]
F01_transcript/21916	--	--	Cellular Component: integral component of membrane (GO:0016021);;	K13348|0|tcc:TCM_031356|K13348 protein Mpv17 | (RefSeq) Peroxisomal membrane 22 kDa family protein isoform 1	ko04146:Peroxisome	[R]	General function prediction only	Mpv17 / PMP22 family	--	S	Function unknown	Peroxisomal membrane 22 kDa family protein isoform 1 [Theobroma cacao]
F01_transcript/967	[N]	Cell motility	Cellular Component: endosome (GO:0005768);; Cellular Component: trans-Golgi network (GO:0005802);; Cellular Component: plasma membrane (GO:0005886);; Molecular Function: zinc ion binding (GO:0008270);; Cellular Component: plasmodesma (GO:0009506);; Biological Process: plant-type primary cell wall biogenesis (GO:0009833);; Biological Process: plant-type secondary cell wall biogenesis (GO:0009834);…	K10999|0|pmum:103330444|K10999 cellulose synthase A [EC:2.4.1.12] | (RefSeq) cellulose synthase A catalytic subunit 3 [UDP-forming]	--	--	--	Cellulose synthase;; Zinc-binding RING-finger;; Glycosyl transferase family group 2	Cellulose synthase A catalytic subunit 3 [UDP-forming] GN=At5g05170 OS=Arabidopsis thaliana (Mouse-ear cress) PE=1 SV=2	M	Cell wall/membrane/envelope biogenesis	PREDICTED: cellulose synthase A catalytic subunit 3 [UDP-forming] [Prunus mume]
F01_transcript/31914	--	--	--	--	--	--	--	Dormancy/auxin associated protein	Auxin-repressed 12.5 kDa protein OS=Fragaria ananassa (Strawberry) PE=2 SV=1	S	Function unknown	Auxin-repressed 12.5 kDa protein, putative [Ricinus communis]
F01_transcript/28657	[R]	General function prediction only	--	--	--	--	--	--	Pathogen-related protein OS=Hordeum vulgare (Barley) PE=2 SV=2	S	Function unknown	hypothetical protein PRUPE_ppa018623mg [Prunus persica]
F01_transcript/28893	[Q]	Secondary metabolites biosynthesis, transport and catabolism	Biological Process: fatty acid biosynthetic process (GO:0006633);; Cellular Component: integral component of membrane (GO:0016021);; Molecular Function: transferase activity, transferring acyl groups other than amino-acyl groups (GO:0016747);;	K15397|6.24183e-136|mdm:103420939|K15397 3-ketoacyl-CoA synthase [EC:2.3.1.199] | (RefSeq) 3-ketoacyl-CoA synthase 4	ko00062:Fatty acid elongation	--	--	3-Oxoacyl-[acyl-carrier-protein (ACP)] synthase III C terminal;; Chalcone and stilbene synthases, C-terminal domain;; FAE1/Type III polyketide synthase-like protein	3-ketoacyl-CoA synthase 4 GN=KCS4 OS=Arabidopsis thaliana (Mouse-ear cress) PE=2 SV=1	I	Lipid transport and metabolism	PREDICTED: 3-ketoacyl-CoA synthase 4 [Sesamum indicum]
F01_transcript/22435	[G]	Carbohydrate transport and metabolism	Biological Process: flavonoid biosynthetic process (GO:0009813);; Cellular Component: intracellular membrane-bounded organelle (GO:0043231);; Biological Process: flavonoid glucuronidation (GO:0052696);; Molecular Function: quercetin 3-O-glucosyltransferase activity (GO:0080043);; Molecular Function: quercetin 7-O-glucosyltransferase activity (GO:0080044);;	--	--	[GC]	--	UDP-glucoronosyl and UDP-glucosyl transferase	UDP-glucose flavonoid 3-O-glucosyltransferase 6 {ECO:0000303|PubMed:18487633} OS=Fragaria ananassa (Strawberry) PE=1 SV=1	S	Function unknown	glucosyltransferase [Eucommia ulmoides]
F01_transcript/8548	[J]	Translation, ribosomal structure and biogenesis	Molecular Function: RNA binding (GO:0003723);; Cellular Component: membrane (GO:0016020);; Molecular Function: tRNA (cytosine-5-)-methyltransferase activity (GO:0016428);; Biological Process: tRNA methylation (GO:0030488);;	K15334|0|vvi:100247473|K15334 multisite-specific tRNA:(cytosine-C5)-methyltransferase [EC:2.1.1.202] | (RefSeq) tRNA (cytosine(34)-C(5))-methyltransferase	--	[J]	Translation, ribosomal structure and biogenesis	16S rRNA methyltransferase RsmB/F	--	J	Translation, ribosomal structure and biogenesis	PREDICTED: tRNA (cytosine(34)-C(5))-methyltransferase [Vitis vinifera]
F01_transcript/14478	--	--	Molecular Function: GPI-anchor transamidase activity (GO:0003923);; Biological Process: attachment of GPI anchor to protein (GO:0016255);; Cellular Component: GPI-anchor transamidase complex (GO:0042765);;	K05292|0|vvi:100257996|K05292 phosphatidylinositol glycan, class T | (RefSeq) GPI transamidase component PIG-T	ko00563:Glycosylphosphatidylinositol(GPI)-anchor biosynthesis	[MO]	--	Gpi16 subunit, GPI transamidase component	--	S	Function unknown	PREDICTED: GPI transamidase component PIG-T [Vitis vinifera]
F01_transcript/7025	--	--	Cellular Component: exocyst (GO:0000145);; Cellular Component: plasma membrane (GO:0005886);; Biological Process: exocytosis (GO:0006887);; Cellular Component: plasmodesma (GO:0009506);; Biological Process: vesicle docking (GO:0048278);;	K19984|0|vvi:100260245|K19984 exocyst complex component 5 | (RefSeq) exocyst complex component SEC10	--	[U]	Intracellular trafficking, secretion, and vesicular transport	Exocyst complex component Sec10	Exocyst complex component SEC10 GN=SEC10 OS=Arabidopsis thaliana (Mouse-ear cress) PE=1 SV=2	U	Intracellular trafficking, secretion, and vesicular transport	PREDICTED: exocyst complex component SEC10 [Vitis vinifera]
F01_transcript/30378	[O]	Posttranslational modification, protein turnover, chaperones	Biological Process: protein peptidyl-prolyl isomerization (GO:0000413);; Molecular Function: peptidyl-prolyl cis-trans isomerase activity (GO:0003755);; Molecular Function: protein binding (GO:0005515);; Cellular Component: endoplasmic reticulum (GO:0005783);; Cellular Component: cytosol (GO:0005829);; Cellular Component: plasma membrane (GO:0005886);; Cellular Component: plasmodesma (GO:0009506)…	K09578|2.31692e-48|tcc:TCM_000228|K09578 peptidyl-prolyl cis-trans isomerase NIMA-interacting 1 [EC:5.2.1.8] | (RefSeq) Peptidylprolyl cis/trans isomerase	--	[O]	Posttranslational modification, protein turnover, chaperones	--	Peptidyl-prolyl cis-trans isomerase Pin1 GN=PIN1 OS=Arabidopsis thaliana (Mouse-ear cress) PE=1 SV=1	O	Posttranslational modification, protein turnover, chaperones	Peptidylprolyl cis/trans isomerase [Theobroma cacao]
F01_transcript/4347	--	--	Cellular Component: nucleus (GO:0005634);; Biological Process: negative regulation of cell proliferation (GO:0008285);; Biological Process: auxin-activated signaling pathway (GO:0009734);; Biological Process: response to abscisic acid (GO:0009737);; Biological Process: positive regulation of flower development (GO:0009911);; Biological Process: fruit dehiscence (GO:0010047);; Biological Process: …	--	--	--	--	Auxin response factor;; B3 DNA binding domain;; AUX/IAA family	Auxin response factor 2 GN=MTG10.3 OS=Arabidopsis thaliana (Mouse-ear cress) PE=1 SV=2	K	Transcription	PREDICTED: auxin response factor 2 [Vitis vinifera]
F01_transcript/6782	--	--	Biological Process: proteasome-mediated ubiquitin-dependent protein catabolic process (GO:0043161);; Molecular Function: ubiquitin protein ligase activity (GO:0061630);;	--	--	[O]	Posttranslational modification, protein turnover, chaperones	Ring finger domain;; Zinc finger, C3HC4 type (RING finger);; RING-H2 zinc finger domain;; Zinc finger, C3HC4 type (RING finger)	E3 ubiquitin-protein ligase MBR1 GN=MBR1 OS=Arabidopsis thaliana (Mouse-ear cress) PE=1 SV=1	O	Posttranslational modification, protein turnover, chaperones	PREDICTED: E3 ubiquitin-protein ligase MBR2 isoform X1 [Vitis vinifera]
F01_transcript/21646	--	--	Biological Process: suberin biosynthetic process (GO:0010345);; Molecular Function: anthranilate N-benzoyltransferase activity (GO:0047672);; Molecular Function: tyramine N-feruloyltransferase activity (GO:0050366);; Molecular Function: hydroxycinnamoyltransferase activity (GO:0050734);; Biological Process: cell wall pectin biosynthetic process (GO:0052325);;	K15400|0|vvi:100854389|K15400 omega-hydroxypalmitate O-feruloyl transferase [EC:2.3.1.188] | (RefSeq) omega-hydroxypalmitate O-feruloyl transferase	ko00073:Cutin, suberine and wax biosynthesis	--	--	Transferase family	Omega-hydroxypalmitate O-feruloyl transferase GN=MEE6.11 OS=Arabidopsis thaliana (Mouse-ear cress) PE=1 SV=1	S	Function unknown	unnamed protein product [Coffea canephora]
F01_transcript/24176	--	--	--	--	--	--	--	--	--	S	Function unknown	PREDICTED: uncharacterized protein LOC101245175 [Solanum lycopersicum]
F01_transcript/34052	--	--	Biological Process: polysaccharide catabolic process (GO:0000272);; Molecular Function: chitinase activity (GO:0004568);; Cellular Component: extracellular region (GO:0005576);; Cellular Component: cell wall (GO:0005618);; Cellular Component: vacuole (GO:0005773);; Biological Process: chitin catabolic process (GO:0006032);; Molecular Function: chitin binding (GO:0008061);; Biological Process: res…	K01183|3.14003e-20|sly:101266770|K01183 chitinase [EC:3.2.1.14] | (RefSeq) endochitinase 3-like	ko00520:Amino sugar and nucleotide sugar metabolism	[R]	General function prediction only	Chitinase class I	Endochitinase 1 (Precursor; Fragment) GN=CHTB1 OS=Solanum tuberosum (Potato) PE=2 SV=1	G	Carbohydrate transport and metabolism	putative endochitinase B [Nicotiana glauca]
F01_transcript/19659	--	--	Cellular Component: plasma membrane (GO:0005886);; Molecular Function: zinc ion binding (GO:0008270);; Cellular Component: integral component of membrane (GO:0016021);; Molecular Function: protein-cysteine S-palmitoyltransferase activity (GO:0019706);;	K16675|0|vvi:100262775|K16675 palmitoyltransferase ZDHHC9/14/18 [EC:2.3.1.225] | (RefSeq) probable protein S-acyltransferase 7	--	[R]	General function prediction only	DHHC palmitoyltransferase	Probable protein S-acyltransferase 7 GN=PAT07 OS=Arabidopsis thaliana (Mouse-ear cress) PE=1 SV=1	S	Function unknown	PREDICTED: probable protein S-acyltransferase 7 isoform X1 [Nelumbo nucifera]
F01_transcript/18437	--	--	Molecular Function: GTPase activator activity (GO:0005096);; Cellular Component: endosome (GO:0005768);; Cellular Component: trans-Golgi network (GO:0005802);; Cellular Component: cytosol (GO:0005829);; Biological Process: floral organ abscission (GO:0010227);; Biological Process: activation of GTPase activity (GO:0090630);;	K12486|0|vvi:100262374|K12486 stromal membrane-associated protein | (RefSeq) probable ADP-ribosylation factor GTPase-activating protein AGD5	ko04144:Endocytosis	[T]	Signal transduction mechanisms	Putative GTPase activating protein for Arf	Probable ADP-ribosylation factor GTPase-activating protein AGD5 GN=MDK4.13 OS=Arabidopsis thaliana (Mouse-ear cress) PE=1 SV=1	U	Intracellular trafficking, secretion, and vesicular transport	PREDICTED: probable ADP-ribosylation factor GTPase-activating protein AGD5 [Vitis vinifera]
F01_transcript/16052	[G]	Carbohydrate transport and metabolism	Molecular Function: magnesium ion binding (GO:0000287);; Molecular Function: pyruvate kinase activity (GO:0004743);; Biological Process: glycolytic process (GO:0006096);; Molecular Function: kinase activity (GO:0016301);; Molecular Function: potassium ion binding (GO:0030955);;	K00873|0|vvi:100244565|K00873 pyruvate kinase [EC:2.7.1.40] | (RefSeq) pyruvate kinase isozyme A, chloroplastic	ko00010:Glycolysis / Gluconeogenesis;ko00230:Purine metabolism;ko00620:Pyruvate metabolism;ko01200:Carbon metabolism;ko01230:Biosynthesis of amino acids	[G]	Carbohydrate transport and metabolism	Pyruvate kinase, barrel domain;; Pyruvate kinase, alpha/beta domain	Pyruvate kinase isozyme A, chloroplastic (Precursor) OS=Ricinus communis (Castor bean) PE=1 SV=1	G	Carbohydrate transport and metabolism	PREDICTED: pyruvate kinase isozyme A, chloroplastic [Vitis vinifera]
F01_transcript/32696	[J]	Translation, ribosomal structure and biogenesis	Molecular Function: structural constituent of ribosome (GO:0003735);; Cellular Component: ribosome (GO:0005840);; Biological Process: translation (GO:0006412);;	K02916|4.53075e-44|pper:PRUPE_ppa012843mg|K02916 large subunit ribosomal protein L35 | (RefSeq) hypothetical protein	ko03010:Ribosome	--	--	Ribosomal protein L35	50S ribosomal protein L35, chloroplastic (Precursor) GN=RPL35 OS=Spinacia oleracea (Spinach) PE=1 SV=1	J	Translation, ribosomal structure and biogenesis	unnamed protein product [Coffea canephora]
F01_transcript/616	--	--	--	--	--	--	--	--	--	S	Function unknown	PREDICTED: LOW QUALITY PROTEIN: uncharacterized protein LOC103333735 [Prunus mume]
F01_transcript/27730	[O]	Posttranslational modification, protein turnover, chaperones	Molecular Function: ATP binding (GO:0005524);; Biological Process: protein folding (GO:0006457);; Biological Process: response to heat (GO:0009408);; Molecular Function: heat shock protein binding (GO:0031072);; Molecular Function: metal ion binding (GO:0046872);; Molecular Function: unfolded protein binding (GO:0051082);;	K09503|1.26108e-165|tcc:TCM_044345|K09503 DnaJ homolog subfamily A member 2 | (RefSeq) DNAJ	ko04141:Protein processing in endoplasmic reticulum	[O]	Posttranslational modification, protein turnover, chaperones	DnaJ C terminal domain;; DnaJ central domain	DnaJ protein homolog (Precursor) GN=DNAJ1 OS=Cucumis sativus (Cucumber) PE=2 SV=1	O	Posttranslational modification, protein turnover, chaperones	DNAJ [Theobroma cacao]
F01_transcript/26869	[O]	Posttranslational modification, protein turnover, chaperones	Molecular Function: threonine-type endopeptidase activity (GO:0004298);; Cellular Component: nucleus (GO:0005634);; Cellular Component: cytoplasm (GO:0005737);; Biological Process: ubiquitin-dependent protein catabolic process (GO:0006511);; Cellular Component: proteasome core complex, alpha-subunit complex (GO:0019773);;	--	--	[O]	Posttranslational modification, protein turnover, chaperones	Proteasome subunit;; Proteasome subunit A N-terminal signature	Proteasome subunit alpha type-4 GN=PAC1 OS=Spinacia oleracea (Spinach) PE=2 SV=1	O	Posttranslational modification, protein turnover, chaperones	PREDICTED: proteasome subunit alpha type-4-like [Cucumis sativus]
F01_transcript/8902	[CE]	--	Biological Process: branched-chain amino acid biosynthetic process (GO:0009082);; Cellular Component: plastid (GO:0009536);; Molecular Function: oxidoreductase activity, acting on the CH-OH group of donors, NAD or NADP as acceptor (GO:0016616);; Molecular Function: metal ion binding (GO:0046872);; Biological Process: oxidation-reduction process (GO:0055114);;	K00030|3.58742e-130|sly:101246168|K00030 isocitrate dehydrogenase (NAD+) [EC:1.1.1.41] | (RefSeq) 3-isopropylmalate dehydrogenase, chloroplastic	ko00020:Citrate cycle (TCA cycle);ko01200:Carbon metabolism;ko01210:2-Oxocarboxylic acid metabolism;ko01230:Biosynthesis of amino acids	[E]	Amino acid transport and metabolism	Isocitrate/isopropylmalate dehydrogenase;; Isocitrate/isopropylmalate dehydrogenase;; Isocitrate/isopropylmalate dehydrogenase	3-isopropylmalate dehydrogenase, chloroplastic (Precursor) OS=Solanum tuberosum (Potato) PE=1 SV=1	E	Amino acid transport and metabolism	PREDICTED: 3-isopropylmalate dehydrogenase, chloroplastic isoform X2 [Sesamum indicum]
F01_transcript/18707	[HT]	--	Molecular Function: ATP binding (GO:0005524);; Cellular Component: plasma membrane (GO:0005886);; Cellular Component: plastoglobule (GO:0010287);; Molecular Function: kinase activity (GO:0016301);; Biological Process: phosphorylation (GO:0016310);;	K08869|0|vvi:100243380|K08869 aarF domain-containing kinase | (RefSeq) uncharacterized aarF domain-containing protein kinase At5g05200, chloroplastic	--	[R]	General function prediction only	ABC1 family	Uncharacterized aarF domain-containing protein kinase At5g05200, chloroplastic (Precursor) GN=At5g05200 OS=Arabidopsis thaliana (Mouse-ear cress) PE=2 SV=1	S	Function unknown	PREDICTED: uncharacterized aarF domain-containing protein kinase At5g05200, chloroplastic [Vitis vinifera]
F01_transcript/7881	[R]	General function prediction only	Molecular Function: transferase activity (GO:0016740);;	--	--	[T]	Signal transduction mechanisms	Tetratricopeptide repeat;; Tetratricopeptide repeat;; Tetratricopeptide repeat;; Tetratricopeptide repeat;; TPR repeat;; Tetratricopeptide repeat;; Tetratricopeptide repeat;; Tetratricopeptide repeat;; Anaphase-promoting complex, cyclosome, subunit 3;; Tetratricopeptide repeat;; Tetratricopeptide repeat;; Vacuolar sorting protein 39 domain 1	Probable UDP-N-acetylglucosamine--peptide N-acetylglucosaminyltransferase SPINDLY GN=SPY OS=Solanum lycopersicum (Tomato) PE=2 SV=1	S	Function unknown	PREDICTED: tetratricopeptide repeat protein 7A-like [Vitis vinifera]
F01_transcript/22907	--	--	--	--	--	--	--	--	--	S	Function unknown	Uncharacterized protein isoform 1 [Theobroma cacao]
F01_transcript/24574	--	--	Molecular Function: transcription corepressor activity (GO:0003714);; Cellular Component: nucleus (GO:0005634);; Biological Process: response to wounding (GO:0009611);; Biological Process: regulation of defense response (GO:0031347);; Biological Process: negative regulation of nucleic acid-templated transcription (GO:1903507);; Biological Process: regulation of jasmonic acid mediated signaling pa…	K13464|3.44284e-88|vvi:100262965|K13464 jasmonate ZIM domain-containing protein | (RefSeq) protein TIFY 6B	ko04075:Plant hormone signal transduction	--	--	tify domain;; Divergent CCT motif	Protein TIFY 6B GN=MEB5.8 OS=Arabidopsis thaliana (Mouse-ear cress) PE=1 SV=1	S	Function unknown	jasmonate ZIM-domain protein 2 [Vitis quinquangularis]
F01_transcript/703	--	--	Molecular Function: DNA binding (GO:0003677);; Cellular Component: nucleus (GO:0005634);; Cellular Component: integral component of membrane (GO:0016021);;	--	--	--	--	SBP domain	Squamosa promoter-binding-like protein 14 GN=F9H16.3 OS=Arabidopsis thaliana (Mouse-ear cress) PE=2 SV=3	S	Function unknown	PREDICTED: squamosa promoter-binding-like protein 14 isoform X1 [Vitis vinifera]
F01_transcript/19214	--	--	Cellular Component: extracellular region (GO:0005576);; Biological Process: pathogenesis (GO:0009405);;	--	--	--	--	Agglutinin domain;; Aerolysin toxin;; Clostridium epsilon toxin ETX/Bacillus mosquitocidal toxin MTX2	--	S	Function unknown	PREDICTED: uncharacterized protein LOC100241465 [Vitis vinifera]
F01_transcript/31967	[O]	Posttranslational modification, protein turnover, chaperones	Molecular Function: threonine-type endopeptidase activity (GO:0004298);; Cellular Component: nucleus (GO:0005634);; Cellular Component: cytoplasm (GO:0005737);; Biological Process: ubiquitin-dependent protein catabolic process (GO:0006511);; Cellular Component: proteasome core complex, alpha-subunit complex (GO:0019773);;	K02726|1.50068e-55|sbi:SORBI_01g033750|K02726 20S proteasome subunit alpha 2 [EC:3.4.25.1] | (RefSeq) SORBIDRAFT_01g033750, Sb01g033750; hypothetical protein	ko03050:Proteasome	[O]	Posttranslational modification, protein turnover, chaperones	Proteasome subunit	Proteasome subunit alpha type-2-B GN=PAB2 OS=Arabidopsis thaliana (Mouse-ear cress) PE=1 SV=1	O	Posttranslational modification, protein turnover, chaperones	BnaA07g34730D [Brassica napus]
F01_transcript/10475	[R]	General function prediction only	Molecular Function: metal ion binding (GO:0046872);;	--	--	--	--	von Willebrand factor type A domain;; von Willebrand factor type A domain;; von Willebrand factor type A domain;; RING-like zinc finger;; Ring finger domain;; Zinc finger, C3HC4 type (RING finger);; Zinc finger, C3HC4 type (RING finger)	--	S	Function unknown	PREDICTED: uncharacterized protein LOC100245763 [Vitis vinifera]
F01_transcript/4731	[L]	Replication, recombination and repair	Molecular Function: DNA binding (GO:0003677);; Molecular Function: DNA topoisomerase type I activity (GO:0003917);; Molecular Function: DNA topoisomerase type II (ATP-hydrolyzing) activity (GO:0003918);; Cellular Component: chromosome (GO:0005694);; Biological Process: DNA topological change (GO:0006265);;	--	--	[L]	Replication, recombination and repair	Eukaryotic DNA topoisomerase I, catalytic core;; Eukaryotic DNA topoisomerase I, DNA binding fragment;; C-terminal topoisomerase domain	DNA topoisomerase 1 GN=TOP1 OS=Arabidopsis thaliana (Mouse-ear cress) PE=1 SV=1	L	Replication, recombination and repair	topoisomerase I [Camptotheca acuminata]
F01_transcript/15344	--	--	Molecular Function: zinc ion binding (GO:0008270);; Molecular Function: ligase activity (GO:0016874);;	--	--	[T]	Signal transduction mechanisms	Copine;; Zinc finger, C3HC4 type (RING finger)	E3 ubiquitin-protein ligase RGLG1 GN=RGLG1 OS=Arabidopsis thaliana (Mouse-ear cress) PE=1 SV=1	S	Function unknown	PREDICTED: E3 ubiquitin-protein ligase RGLG2 [Nelumbo nucifera]
F01_transcript/23955	[J]	Translation, ribosomal structure and biogenesis	Biological Process: maturation of SSU-rRNA from tricistronic rRNA transcript (SSU-rRNA, 5.8S rRNA, LSU-rRNA) (GO:0000462);; Cellular Component: nucleolus (GO:0005730);; Molecular Function: rRNA binding (GO:0019843);; Cellular Component: small-subunit processome (GO:0032040);; Molecular Function: rRNA (pseudouridine) methyltransferase activity (GO:0070037);; Biological Process: rRNA base methylati…	K14568|5.57373e-140|vvi:100258999|K14568 rRNA small subunit pseudouridine methyltransferase Nep1 [EC:2.1.1.260] | (RefSeq) ribosomal RNA small subunit methyltransferase nep-1	ko03008:Ribosome biogenesis in eukaryotes	[J]	Translation, ribosomal structure and biogenesis	EMG1/NEP1 methyltransferase	--	J	Translation, ribosomal structure and biogenesis	PREDICTED: ribosomal RNA small subunit methyltransferase nep-1 [Vitis vinifera]
F01_transcript/20615	--	--	Molecular Function: RNA binding (GO:0003723);; Cellular Component: nucleus (GO:0005634);; Cellular Component: cytoplasm (GO:0005737);; Biological Process: positive regulation of flower development (GO:0009911);;	K13162|0|tcc:TCM_026308|K13162 poly(rC)-binding protein 2/3/4 | (RefSeq) RNA-binding KH domain-containing protein	--	[AR]	--	KH domain;; KH domain	KH domain-containing protein At4g18375 GN=At4g18375 OS=Arabidopsis thaliana (Mouse-ear cress) PE=2 SV=1	S	Function unknown	Poly(rC)-binding protein, putative [Ricinus communis]
F01_transcript/11357	[S]	Function unknown	Cellular Component: integral component of membrane (GO:0016021);; Biological Process: transmembrane transport (GO:0055085);;	--	--	[T]	Signal transduction mechanisms	OPT oligopeptide transporter protein	Oligopeptide transporter 7 GN=OPT7 OS=Arabidopsis thaliana (Mouse-ear cress) PE=2 SV=1	S	Function unknown	PREDICTED: oligopeptide transporter 7-like [Vitis vinifera]
F01_transcript/1409	[K]	Transcription	Molecular Function: protein serine/threonine kinase activity (GO:0004674);; Molecular Function: ATP binding (GO:0005524);; Biological Process: protein phosphorylation (GO:0006468);; Biological Process: pollen germination (GO:0009846);; Biological Process: longitudinal axis specification (GO:0009942);; Biological Process: radial axis specification (GO:0009945);; Cellular Component: integral compon…	--	--	--	--	Protein kinase domain;; Protein tyrosine kinase;; Leucine rich repeat;; Leucine Rich repeats (2 copies);; Leucine Rich Repeat	LRR receptor-like serine/threonine-protein kinase RPK2 (Precursor) OS=Arabidopsis thaliana (Mouse-ear cress) PE=2 SV=1	S	Function unknown	unnamed protein product [Coffea canephora]
F01_transcript/21860	--	--	Molecular Function: DNA binding (GO:0003677);; Cellular Component: nucleus (GO:0005634);; Biological Process: regulation of transcription, DNA-templated (GO:0006355);; Biological Process: pollen development (GO:0009555);; Molecular Function: oxidoreductase activity (GO:0016491);; Molecular Function: protein dimerization activity (GO:0046983);;	K04454|4.11637e-158|vvi:100250157|K04454 MADS-box transcription enhancer factor 2C | (RefSeq) agamous-like MADS-box protein AGL65	--	[K]	Transcription	SRF-type transcription factor (DNA-binding and dimerisation domain)	Floral homeotic protein FBP1 GN=FBP1 OS=Petunia hybrida (Petunia) PE=2 SV=1	K	Transcription	PREDICTED: agamous-like MADS-box protein AGL17 [Vitis vinifera]
F01_transcript/15314	[I]	Lipid transport and metabolism	Cellular Component: ruffle membrane (GO:0032587);; Molecular Function: phosphatidylinositol binding (GO:0035091);; Molecular Function: metal ion binding (GO:0046872);; Biological Process: regulation of ruffle assembly (GO:1900027);;	K20523|0|cic:CICLE_v100081232m|K20523 SH3 domain-containing YSC84-like protein 1 | (RefSeq) hypothetical protein	--	[S]	Function unknown	Las17-binding protein actin regulator;; FYVE zinc finger	1-phosphatidylinositol-3-phosphate 5-kinase FAB1A GN=FAB1A OS=Arabidopsis thaliana (Mouse-ear cress) PE=2 SV=1	S	Function unknown	PREDICTED: uncharacterized protein LOC105173727 [Sesamum indicum]
F01_transcript/28048	--	--	Molecular Function: calcium-transporting ATPase activity (GO:0005388);; Cellular Component: cytosol (GO:0005829);; Biological Process: calcium ion transmembrane transport (GO:0070588);;	K03626|7.98008e-72|sly:101252667|K03626 nascent polypeptide-associated complex subunit alpha | (RefSeq) nascent polypeptide-associated complex subunit alpha-like protein 2	--	[K]	Transcription	NAC domain	Nascent polypeptide-associated complex subunit alpha-like protein 2 GN=At3g49470 OS=Arabidopsis thaliana (Mouse-ear cress) PE=2 SV=2	K	Transcription	PREDICTED: nascent polypeptide-associated complex subunit alpha-like protein 2 [Solanum lycopersicum]
F01_transcript/33388	--	--	--	--	--	--	--	Dormancy/auxin associated protein	Auxin-repressed 12.5 kDa protein OS=Fragaria ananassa (Strawberry) PE=2 SV=1	S	Function unknown	auxin-repressed protein-like protein ARP2 [Manihot esculenta]
F01_transcript/23424	[I]	Lipid transport and metabolism	Biological Process: lipid metabolic process (GO:0006629);; Cellular Component: integral component of membrane (GO:0016021);; Molecular Function: lipase activity (GO:0016298);;	--	--	[I]	Lipid transport and metabolism	Serine aminopeptidase, S33;; Alpha/beta hydrolase family;; alpha/beta hydrolase fold	Caffeoylshikimate esterase GN=CSE OS=Arabidopsis thaliana (Mouse-ear cress) PE=1 SV=1	I	Lipid transport and metabolism	PREDICTED: monoglyceride lipase [Vitis vinifera]
F01_transcript/20468	[I]	Lipid transport and metabolism	Molecular Function: isomerase activity (GO:0016853);; Molecular Function: manganese ion binding (GO:0030145);; Molecular Function: 1-deoxy-D-xylulose-5-phosphate reductoisomerase activity (GO:0030604);; Biological Process: isopentenyl diphosphate biosynthetic process, methylerythritol 4-phosphate pathway involved in terpenoid biosynthetic process (GO:0051484);; Biological Process: oxidation-reduc…	K00099|0|vvi:100248516|K00099 1-deoxy-D-xylulose-5-phosphate reductoisomerase [EC:1.1.1.267] | (RefSeq) 1-deoxy-D-xylulose 5-phosphate reductoisomerase, chloroplastic	ko00900:Terpenoid backbone biosynthesis	--	--	1-deoxy-D-xylulose 5-phosphate reductoisomerase;; 1-deoxy-D-xylulose 5-phosphate reductoisomerase C-terminal;; DXP reductoisomerase C-terminal domain	1-deoxy-D-xylulose 5-phosphate reductoisomerase, chloroplastic (Precursor) GN=DXR OS=Mentha piperita (Peppermint) PE=2 SV=2	I	Lipid transport and metabolism	1-deoxy-D-xylulose 5-phosphate reductoisomerase [Actinidia arguta]
F01_transcript/9002	[O]	Posttranslational modification, protein turnover, chaperones	Molecular Function: ATP binding (GO:0005524);; Molecular Function: microtubule-severing ATPase activity (GO:0008568);; Biological Process: cell division (GO:0051301);;	K13525|0|vvi:100265402|K13525 transitional endoplasmic reticulum ATPase | (RefSeq) cell division cycle protein 48 homolog	ko04141:Protein processing in endoplasmic reticulum	[O]	Posttranslational modification, protein turnover, chaperones	ATPase family associated with various cellular activities (AAA);; Cell division protein 48 (CDC48), N-terminal domain;; Holliday junction DNA helicase ruvB N-terminus;; AAA domain (Cdc48 subfamily);; AAA ATPase domain;; Cell division protein 48 (CDC48), domain 2;; AAA domain;; AAA domain;; AAA domain (dynein-related subfamily);; AAA domain;; TIP49 C-terminus;; AAA domain;; RNA helicase;; Magnesiu…	Cell division cycle protein 48 homolog GN=CDC48 OS=Glycine max (Soybean) PE=1 SV=1	O	Posttranslational modification, protein turnover, chaperones	hypothetical protein JCGZ_16546 [Jatropha curcas]
F01_transcript/5119	--	--	--	--	--	[A]	RNA processing and modification	RNA recognition motif. (a.k.a. RRM, RBD, or RNP domain);; Nup53/35/40-type RNA recognition motif	Serine/arginine-rich splicing factor RS40 GN=M7J2.130 OS=Arabidopsis thaliana (Mouse-ear cress) PE=1 SV=2	S	Function unknown	PREDICTED: nucleolin-like [Vitis vinifera]
F01_transcript/17031	--	--	Cellular Component: integral component of membrane (GO:0016021);;	K14617|0|pop:POPTR_0006s10100g|K14617 LMBR1 domain-containing protein 1 | (RefSeq) POPTRDRAFT_831922; LMBR1 integral membrane family protein	--	--	--	LMBR1-like membrane protein;; LMBR1-like membrane protein	LIMR family protein At5g01460 GN=At5g01460 OS=Arabidopsis thaliana (Mouse-ear cress) PE=2 SV=1	S	Function unknown	PREDICTED: LIMR family protein At5g01460-like [Populus euphratica]
F01_transcript/11232	--	--	--	K08331|0|sly:101244264|K08331 autophagy-related protein 13 | (RefSeq) autophagy-related protein 13	ko04140:Regulation of autophagy	[U]	Intracellular trafficking, secretion, and vesicular transport	Autophagy-related protein 13	--	U	Intracellular trafficking, secretion, and vesicular transport	PREDICTED: autophagy-related protein 13 [Nicotiana tomentosiformis]
F01_transcript/1808	[R]	General function prediction only	Biological Process: regulation of transcription, DNA-templated (GO:0006355);;	--	--	[R]	General function prediction only	WD domain, G-beta repeat;; Anaphase-promoting complex subunit 4 WD40 domain;; Eukaryotic translation initiation factor eIF2A	Topless-related protein 3 GN=TPR3 OS=Arabidopsis thaliana (Mouse-ear cress) PE=1 SV=1	S	Function unknown	PREDICTED: topless-related protein 3-like [Sesamum indicum]
F01_transcript/22311	--	--	Cellular Component: cytosol (GO:0005829);; Cellular Component: cilium (GO:0005929);; Cellular Component: chloroplast stroma (GO:0009570);; Molecular Function: ligase activity (GO:0016874);; Cellular Component: intraciliary transport particle A (GO:0030991);; Biological Process: intraciliary retrograde transport (GO:0035721);; Biological Process: cilium assembly (GO:0060271);; Biological Process: …	--	--	--	--	--	--	S	Function unknown	PREDICTED: uncharacterized protein LOC104591663 [Nelumbo nucifera]
F01_transcript/32561	--	--	Cellular Component: mitochondrion (GO:0005739);; Biological Process: response to cytokinin (GO:0009735);; Cellular Component: integral component of membrane (GO:0016021);;	--	--	--	--	--	--	S	Function unknown	PREDICTED: uncharacterized protein LOC105173072 [Sesamum indicum]
F01_transcript/13130	[J]	Translation, ribosomal structure and biogenesis	Molecular Function: nucleotide binding (GO:0000166);; Molecular Function: nucleic acid binding (GO:0003676);;	K14411|0|pvu:PHAVU_008G286500g|K14411 RNA-binding protein Musashi | (RefSeq) hypothetical protein	ko03015:mRNA surveillance pathway	[A]	RNA processing and modification	RNA recognition motif. (a.k.a. RRM, RBD, or RNP domain);; RNA recognition motif	Heterogeneous nuclear ribonucleoprotein 1 GN=RNP1 OS=Arabidopsis thaliana (Mouse-ear cress) PE=1 SV=1	S	Function unknown	hypothetical protein PHAVU_008G286500g [Phaseolus vulgaris]
F01_transcript/9521	[S]	Function unknown	Molecular Function: phosphoric diester hydrolase activity (GO:0008081);; Cellular Component: membrane (GO:0016020);;	--	--	[C]	Energy production and conversion	Glycerophosphoryl diester phosphodiesterase family;; Uncharacterised protein from bacillus cereus group	Glycerophosphodiester phosphodiesterase GDPDL3 {ECO:0000305} (Precursor) GN=F10M23.30 OS=Arabidopsis thaliana (Mouse-ear cress) PE=1 SV=3	C	Energy production and conversion	PREDICTED: glycerophosphodiester phosphodiesterase GDPDL3-like [Sesamum indicum]
F01_transcript/31624	--	--	Molecular Function: nucleotide binding (GO:0000166);; Molecular Function: mRNA binding (GO:0003729);; Cellular Component: nucleus (GO:0005634);; Cellular Component: cytosol (GO:0005829);; Biological Process: mRNA processing (GO:0006397);; Molecular Function: poly(A) binding (GO:0008143);; Cellular Component: cytoplasmic stress granule (GO:0010494);;	--	--	[R]	General function prediction only	RNA recognition motif. (a.k.a. RRM, RBD, or RNP domain)	Polyadenylate-binding protein RBP47B GN=RBP47B OS=Arabidopsis thaliana (Mouse-ear cress) PE=2 SV=1	S	Function unknown	hypothetical protein JCGZ_01681 [Jatropha curcas]
F01_transcript/1651	[I]	Lipid transport and metabolism	Molecular Function: zinc ion binding (GO:0008270);; Molecular Function: hydrolase activity (GO:0016787);;	--	--	--	--	--	--	S	Function unknown	PREDICTED: uncharacterized protein LOC103453342 [Malus domestica]
F01_transcript/22906	--	--	Molecular Function: nucleotide binding (GO:0000166);; Cellular Component: P-body (GO:0000932);; Molecular Function: RNA binding (GO:0003723);; Cellular Component: nucleus (GO:0005634);; Biological Process: mRNA processing (GO:0006397);; Biological Process: regulation of RNA splicing (GO:0043484);; Biological Process: regulation of cell differentiation (GO:0045595);;	--	--	[A]	RNA processing and modification	RNA recognition motif. (a.k.a. RRM, RBD, or RNP domain);; RNA recognition motif. (a.k.a. RRM, RBD, or RNP domain)	Polypyrimidine tract-binding protein homolog 3 GN=At1g43190 OS=Arabidopsis thaliana (Mouse-ear cress) PE=2 SV=1	S	Function unknown	Polypyrimidine tract-binding protein 3 [Theobroma cacao]
F01_transcript/11004	--	--	Molecular Function: 1-phosphatidylinositol binding (GO:0005545);; Cellular Component: clathrin-coated vesicle (GO:0030136);; Molecular Function: clathrin binding (GO:0030276);; Molecular Function: 2-alkenal reductase [NAD(P)] activity (GO:0032440);; Biological Process: clathrin coat assembly (GO:0048268);; Biological Process: oxidation-reduction process (GO:0055114);;	--	--	[TU]	--	ANTH domain;; ENTH domain	Putative clathrin assembly protein At2g25430 GN=At2g25430 OS=Arabidopsis thaliana (Mouse-ear cress) PE=1 SV=2	U	Intracellular trafficking, secretion, and vesicular transport	PREDICTED: putative clathrin assembly protein At2g25430 [Sesamum indicum]
F01_transcript/31822	--	--	--	--	--	--	--	--	--	S	Function unknown	PREDICTED: uncharacterized protein LOC104585789 isoform X2 [Nelumbo nucifera]
F01_transcript/8611	[Q]	Secondary metabolites biosynthesis, transport and catabolism	Molecular Function: cellulase activity (GO:0008810);; Cellular Component: integral component of membrane (GO:0016021);; Biological Process: cellulose catabolic process (GO:0030245);;	--	--	--	--	Glycosyl hydrolase family 9	Endoglucanase 25 GN=K2I5.8 OS=Arabidopsis thaliana (Mouse-ear cress) PE=1 SV=1	U	Intracellular trafficking, secretion, and vesicular transport	PREDICTED: endoglucanase 25 [Vitis vinifera]
F01_transcript/15006	--	--	Biological Process: intra-Golgi vesicle-mediated transport (GO:0006891);; Cellular Component: plasmodesma (GO:0009506);; Cellular Component: Golgi transport complex (GO:0017119);;	K20295|0|vvi:100245590|K20295 conserved oligomeric Golgi complex subunit 8 | (RefSeq) conserved oligomeric Golgi complex subunit 8	--	[U]	Intracellular trafficking, secretion, and vesicular transport	Dor1-like family;; Vps51/Vps67	--	S	Function unknown	PREDICTED: conserved oligomeric Golgi complex subunit 8 [Vitis vinifera]
F01_transcript/30293	--	--	Molecular Function: structural constituent of ribosome (GO:0003735);; Cellular Component: mitochondrion (GO:0005739);; Cellular Component: ribosome (GO:0005840);; Biological Process: translation (GO:0006412);;	--	--	--	--	Ribosomal protein L35	--	S	Function unknown	PREDICTED: uncharacterized protein LOC104227050 [Nicotiana sylvestris]
F01_transcript/29136	--	--	Molecular Function: structural constituent of ribosome (GO:0003735);; Biological Process: rRNA processing (GO:0006364);; Biological Process: translation (GO:0006412);; Cellular Component: cytosolic small ribosomal subunit (GO:0022627);; Cellular Component: 90S preribosome (GO:0030686);; Cellular Component: small-subunit processome (GO:0032040);; Biological Process: ribosomal small subunit biogene…	K02993|6.38883e-123|pvu:PHAVU_002G317200g|K02993 small subunit ribosomal protein S7e | (RefSeq) hypothetical protein	ko03010:Ribosome	[J]	Translation, ribosomal structure and biogenesis	Ribosomal protein S7e	40S ribosomal protein S7 GN=RPS7 OS=Avicennia marina (Grey mangrove) PE=2 SV=1	J	Translation, ribosomal structure and biogenesis	PREDICTED: 40S ribosomal protein S7-like [Nicotiana sylvestris]
F01_transcript/20366	[T]	Signal transduction mechanisms	Molecular Function: protein serine/threonine kinase activity (GO:0004674);; Molecular Function: non-membrane spanning protein tyrosine kinase activity (GO:0004715);; Molecular Function: ATP binding (GO:0005524);; Cellular Component: plasma membrane (GO:0005886);; Biological Process: peptidyl-tyrosine phosphorylation (GO:0018108);;	--	--	[T]	Signal transduction mechanisms	Protein tyrosine kinase;; Protein kinase domain	Probable serine/threonine-protein kinase Cx32, chloroplastic (Precursor) GN=At4g35600 OS=Arabidopsis thaliana (Mouse-ear cress) PE=1 SV=2	T	Signal transduction mechanisms	PREDICTED: probable serine/threonine-protein kinase Cx32, chloroplastic isoform X1 [Nicotiana sylvestris]
F01_transcript/1089	[KT]	--	Molecular Function: phosphorelay sensor kinase activity (GO:0000155);; Biological Process: vasculature development (GO:0001944);; Biological Process: response to molecule of bacterial origin (GO:0002237);; Molecular Function: ATP binding (GO:0005524);; Cellular Component: endoplasmic reticulum membrane (GO:0005789);; Biological Process: response to heat (GO:0009408);; Biological Process: response…	K14509|0|tcc:TCM_032339|K14509 ethylene receptor [EC:2.7.13.-] | (RefSeq) Signal transduction histidine kinase isoform 5	ko04075:Plant hormone signal transduction	[T]	Signal transduction mechanisms	Histidine kinase-, DNA gyrase B-, and HSP90-like ATPase;; His Kinase A (phospho-acceptor) domain;; GAF domain	Ethylene receptor 1 GN=ETR1 OS=Pelargonium hortorum (Common geranium) PE=2 SV=1	T	Signal transduction mechanisms	ethylene receptor ETR1 [Actinidia deliciosa]
F01_transcript/4369	[K]	Transcription	--	K13457|0|pxb:103963440|K13457 disease resistance protein RPM1 | (RefSeq) disease resistance protein RPM1-like	ko04626:Plant-pathogen interaction	[T]	Signal transduction mechanisms	NB-ARC domain	Disease resistance protein RPM1 GN=F17A9.20 OS=Arabidopsis thaliana (Mouse-ear cress) PE=1 SV=1	S	Function unknown	PREDICTED: disease resistance protein RPM1-like isoform X2 [Pyrus x bretschneideri]
F01_transcript/23283	[R]	General function prediction only	Molecular Function: DNA binding (GO:0003677);; Cellular Component: nucleus (GO:0005634);; Cellular Component: cytoplasm (GO:0005737);; Biological Process: multicellular organism development (GO:0007275);; Biological Process: trichome differentiation (GO:0010026);; Biological Process: regulation of protein localization (GO:0032880);; Biological Process: cell fate commitment (GO:0045165);;	K11805|0|pper:PRUPE_ppa008187mg|K11805 WD repeat-containing protein 68 | (RefSeq) hypothetical protein	--	[S]	Function unknown	WD domain, G-beta repeat	Protein TRANSPARENT TESTA GLABRA 1 GN=TTG1 OS=Arabidopsis thaliana (Mouse-ear cress) PE=1 SV=1	S	Function unknown	WD40 protein [Paeonia suffruticosa]
F01_transcript/2587	[R]	General function prediction only	Molecular Function: nucleotide binding (GO:0000166);; Molecular Function: protein kinase activity (GO:0004672);; Biological Process: phosphorylation (GO:0016310);;	K08857|0|vvi:100258125|K08857 NIMA (never in mitosis gene a)-related kinase 1/4/5 [EC:2.7.11.1] | (RefSeq) serine/threonine-protein kinase Nek5	--	[R]	General function prediction only	Protein kinase domain;; Protein tyrosine kinase;; Kinase-like	Serine/threonine-protein kinase Nek4 GN=B1110B01.5 OS=Oryza sativa subsp. japonica (Rice) PE=2 SV=1	T	Signal transduction mechanisms	serine/threonine-protein kinase [Camellia sinensis]
F01_transcript/27743	[J]	Translation, ribosomal structure and biogenesis	--	K12881|3.55105e-74|vvi:100257081|K12881 THO complex subunit 4 | (RefSeq) THO complex subunit 4A	ko03013:RNA transport;ko03015:mRNA surveillance pathway;ko03040:Spliceosome	[A]	RNA processing and modification	RNA recognition motif. (a.k.a. RRM, RBD, or RNP domain);; C-terminal duplication domain of Friend of PRMT1	THO complex subunit 4A GN=MMN10.26 OS=Arabidopsis thaliana (Mouse-ear cress) PE=1 SV=1	S	Function unknown	PREDICTED: THO complex subunit 4A-like isoform X1 [Nelumbo nucifera]
F01_transcript/7496	--	--	Molecular Function: translation initiation factor activity (GO:0003743);; Biological Process: translational initiation (GO:0006413);;	K11593|0|vvi:100241029|K11593 eukaryotic translation initiation factor 2C | (RefSeq) protein argonaute 4	--	[J]	Translation, ribosomal structure and biogenesis	Piwi domain;; N-terminal domain of argonaute;; PAZ domain;; Argonaute linker 1 domain;; Argonaute linker 2 domain;; Mid domain of argonaute	Protein argonaute 4 GN=T20P8.9 OS=Arabidopsis thaliana (Mouse-ear cress) PE=1 SV=2	J	Translation, ribosomal structure and biogenesis	argonaute 4-like protein [Pelargonium x hortorum]
F01_transcript/10878	--	--	--	K13210|1.70418e-170|pper:PRUPE_ppa001735mg|K13210 far upstream element-binding protein | (RefSeq) hypothetical protein	--	[A]	RNA processing and modification	KH domain;; KH domain;; KH domain	--	S	Function unknown	PREDICTED: far upstream element-binding protein 2 isoform X1 [Sesamum indicum]
F01_transcript/30409	[J]	Translation, ribosomal structure and biogenesis	Biological Process: maturation of SSU-rRNA from tricistronic rRNA transcript (SSU-rRNA, 5.8S rRNA, LSU-rRNA) (GO:0000462);; Molecular Function: structural constituent of ribosome (GO:0003735);; Biological Process: translation (GO:0006412);; Cellular Component: cytosolic small ribosomal subunit (GO:0022627);;	K02960|1.31351e-94|cit:102619145|K02960 small subunit ribosomal protein S16e | (RefSeq) 40S ribosomal protein S16	ko03010:Ribosome	[J]	Translation, ribosomal structure and biogenesis	Ribosomal protein S9/S16	40S ribosomal protein S16 GN=RPS16 OS=Gossypium hirsutum (Upland cotton) PE=2 SV=1	J	Translation, ribosomal structure and biogenesis	hypothetical protein CICLE_v10029508mg [Citrus clementina]
F01_transcript/6421	[T]	Signal transduction mechanisms	Molecular Function: ATP binding (GO:0005524);; Biological Process: response to wounding (GO:0009611);; Biological Process: response to salt stress (GO:0009651);; Biological Process: response to abscisic acid (GO:0009737);; Cellular Component: external side of plasma membrane (GO:0009897);; Biological Process: stem vascular tissue pattern formation (GO:0010222);; Biological Process: cotyledon vasc…	--	--	[Q]	Secondary metabolites biosynthesis, transport and catabolism	ABC-2 type transporter;; ABC transporter;; AAA domain, putative AbiEii toxin, Type IV TA system;; P-loop containing region of AAA domain	ABC transporter G family member 11 GN=At1g17840 OS=Arabidopsis thaliana (Mouse-ear cress) PE=1 SV=1	V	Defense mechanisms	ATP-binding cassette transporter, putative [Ricinus communis]
F01_transcript/7395	[I]	Lipid transport and metabolism	Cellular Component: endosome (GO:0005768);; Cellular Component: vacuolar membrane (GO:0005774);; Cellular Component: trans-Golgi network (GO:0005802);; Molecular Function: S-adenosylmethionine-dependent methyltransferase activity (GO:0008757);; Biological Process: response to cytokinin (GO:0009735);; Biological Process: homogalacturonan biosynthetic process (GO:0010289);; Cellular Component: inte…	--	--	--	--	Putative S-adenosyl-L-methionine-dependent methyltransferase;; Methyltransferase domain;; Methyltransferase domain;; Methyltransferase domain	Probable pectin methyltransferase QUA2 OS=Arabidopsis thaliana (Mouse-ear cress) PE=1 SV=2	S	Function unknown	S-adenosyl-L-methionine-dependent methyltransferases superfamily protein isoform 1 [Theobroma cacao]
F01_transcript/29108	--	--	--	--	--	--	--	--	--	S	Function unknown	BnaC01g16300D [Brassica napus]
F01_transcript/15210	--	--	--	--	--	--	--	bHLH-MYC and R2R3-MYB transcription factors N-terminal;; Helix-loop-helix DNA-binding domain	Transcription factor GLABRA 3 GN=At5g41315 OS=Arabidopsis thaliana (Mouse-ear cress) PE=1 SV=1	K	Transcription	myc-like anthocyanin regulatory protein [Cornus chinensis]
F01_transcript/17864	[J]	Translation, ribosomal structure and biogenesis	Molecular Function: nucleic acid binding (GO:0003676);; Biological Process: negative regulation of gene expression (GO:0010629);; Biological Process: mRNA 3'-end processing (GO:0031124);; Biological Process: single-organism process (GO:0044699);;	K14407|2.5868e-146|vvi:100256296|K14407 cleavage stimulation factor subunit 2 | (RefSeq) cleavage stimulating factor 64	ko03015:mRNA surveillance pathway	[A]	RNA processing and modification	Hinge domain of cleavage stimulation factor subunit 2;; Transcription termination and cleavage factor C-terminal	Cleavage stimulating factor 64 {ECO:0000303|PubMed:12379796} OS=Arabidopsis thaliana (Mouse-ear cress) PE=1 SV=1	S	Function unknown	PREDICTED: cleavage stimulating factor 64 [Vitis vinifera]
F01_transcript/477	--	--	--	K12616|0|vvi:100259985|K12616 enhancer of mRNA-decapping protein 4 | (RefSeq) enhancer of mRNA-decapping protein 4	ko03018:RNA degradation	[R]	General function prediction only	WD40 region of Ge1, enhancer of mRNA-decapping protein;; WD domain, G-beta repeat	Enhancer of mRNA-decapping protein 4 GN=MDC11.13 OS=Arabidopsis thaliana (Mouse-ear cress) PE=1 SV=1	S	Function unknown	PREDICTED: enhancer of mRNA-decapping protein 4 [Vitis vinifera]
F01_transcript/23413	[O]	Posttranslational modification, protein turnover, chaperones	Cellular Component: cell (GO:0005623);; Biological Process: cell redox homeostasis (GO:0045454);;	--	--	[OT]	--	Thioredoxin;; Tetratricopeptide repeat;; Tetratricopeptide repeat;; Tetratricopeptide repeat;; TPR repeat	TPR repeat-containing thioredoxin TDX GN=MEB5.10/MEB5.9 OS=Arabidopsis thaliana (Mouse-ear cress) PE=1 SV=1	S	Function unknown	PREDICTED: TPR repeat-containing thioredoxin TDX isoform X2 [Malus domestica]
F01_transcript/29885	--	--	Molecular Function: sequence-specific DNA binding (GO:0043565);;	K03627|9.64244e-63|cam:101500895|K03627 putative transcription factor | (RefSeq) multiprotein-bridging factor 1a-like	--	[K]	Transcription	Multiprotein bridging factor 1	Multiprotein-bridging factor 1b GN=MBF1B OS=Arabidopsis thaliana (Mouse-ear cress) PE=2 SV=1	K	Transcription	PREDICTED: multiprotein-bridging factor 1b-like [Cicer arietinum]
F01_transcript/26287	--	--	--	--	--	[S]	Function unknown	RWD domain	--	S	Function unknown	RWD domain-containing 1 [Gossypium arboreum]
F01_transcript/24026	[H]	Coenzyme transport and metabolism	Molecular Function: dimethylallyltranstransferase activity (GO:0004161);; Molecular Function: farnesyltranstransferase activity (GO:0004311);; Biological Process: isoprenoid biosynthetic process (GO:0008299);; Cellular Component: stromule (GO:0010319);;	K13789|1.27466e-180|vvi:100266842|K13789 geranylgeranyl diphosphate synthase, type II [EC:2.5.1.1 2.5.1.10 2.5.1.29] | (RefSeq) geranylgeranyl pyrophosphate synthase, chloroplastic	ko00900:Terpenoid backbone biosynthesis	[H]	Coenzyme transport and metabolism	Polyprenyl synthetase	Geranylgeranyl pyrophosphate synthase, chloroplastic (Precursor) GN=GGPS1 OS=Catharanthus roseus (Madagascar periwinkle) PE=3 SV=1	H	Coenzyme transport and metabolism	geranylgeranyl pyrophosphate synthase [Elaeagnus umbellata]
F01_transcript/33787	--	--	Molecular Function: ubiquitin-protein transferase activity (GO:0004842);; Molecular Function: ATP binding (GO:0005524);; Cellular Component: cytoplasm (GO:0005737);; Cellular Component: plasma membrane (GO:0005886);; Biological Process: ubiquitin-dependent protein catabolic process (GO:0006511);; Biological Process: cellular ion homeostasis (GO:0006873);; Molecular Function: voltage-gated anion c…	--	--	[O]	Posttranslational modification, protein turnover, chaperones	Ubiquitin-conjugating enzyme	SUMO-conjugating enzyme UBC9 GN=T13J8.70 OS=Arabidopsis thaliana (Mouse-ear cress) PE=1 SV=1	P	Inorganic ion transport and metabolism	BnaA08g13930D [Brassica napus]
F01_transcript/12748	[T]	Signal transduction mechanisms	Molecular Function: protein serine/threonine kinase activity (GO:0004674);; Molecular Function: non-membrane spanning protein tyrosine kinase activity (GO:0004715);; Molecular Function: ATP binding (GO:0005524);; Cellular Component: integral component of membrane (GO:0016021);; Biological Process: peptidyl-tyrosine phosphorylation (GO:0018108);;	K13429|0|cit:102622024|K13429 chitin elicitor receptor kinase 1 | (RefSeq) chitin elicitor receptor kinase 1-like	ko04626:Plant-pathogen interaction	--	--	Protein tyrosine kinase;; Protein kinase domain	Chitin elicitor receptor kinase 1 (Precursor) GN=MIL23.20 OS=Arabidopsis thaliana (Mouse-ear cress) PE=1 SV=1	T	Signal transduction mechanisms	PREDICTED: chitin elicitor receptor kinase 1-like [Vitis vinifera]
F01_transcript/32199	--	--	Biological Process: cytoplasmic translation (GO:0002181);; Molecular Function: structural constituent of ribosome (GO:0003735);; Cellular Component: cytosolic large ribosomal subunit (GO:0022625);;	K02910|7.73802e-60|cmo:103498384|K02910 large subunit ribosomal protein L31e | (RefSeq) 60S ribosomal protein L31	ko03010:Ribosome	[J]	Translation, ribosomal structure and biogenesis	Ribosomal protein L31e	60S ribosomal protein L31 GN=RPL31 OS=Nicotiana glutinosa (Tobacco) PE=2 SV=1	J	Translation, ribosomal structure and biogenesis	PREDICTED: 60S ribosomal protein L31 [Cucumis melo]
F01_transcript/1390	[P]	Inorganic ion transport and metabolism	Molecular Function: calcium-transporting ATPase activity (GO:0005388);; Molecular Function: calmodulin binding (GO:0005516);; Molecular Function: ATP binding (GO:0005524);; Cellular Component: integral component of membrane (GO:0016021);; Molecular Function: metal ion binding (GO:0046872);; Biological Process: calcium ion transmembrane transport (GO:0070588);;	K01537|0|sot:102605827|K01537 Ca2+-transporting ATPase [EC:3.6.3.8] | (RefSeq) calcium-transporting ATPase 9, plasma membrane-type	--	[P]	Inorganic ion transport and metabolism	Cation transporting ATPase, C-terminus;; E1-E2 ATPase;; haloacid dehalogenase-like hydrolase;; Ca2+-ATPase N terminal autoinhibitory domain;; Cation transport ATPase (P-type);; Cation transporter/ATPase, N-terminus	Calcium-transporting ATPase 9, plasma membrane-type GN=ACA9 OS=Arabidopsis thaliana (Mouse-ear cress) PE=2 SV=2	P	Inorganic ion transport and metabolism	hypothetical protein MIMGU_mgv1a000501mg [Erythranthe guttata]
F01_transcript/21987	--	--	Molecular Function: serine-type carboxypeptidase activity (GO:0004185);; Biological Process: proteolysis (GO:0006508);; Molecular Function: dipeptidyl-peptidase activity (GO:0008239);;	K01285|0|pop:POPTR_0018s11930g|K01285 lysosomal Pro-X carboxypeptidase [EC:3.4.16.2] | (RefSeq) POPTRDRAFT_262770; serine carboxypeptidase S28 family protein	--	[OR]	--	Serine carboxypeptidase S28;; Serine aminopeptidase, S33;; Prolyl oligopeptidase family;; Serine carboxypeptidase S28	Probable serine protease EDA2 (Precursor) GN=EDA2 OS=Arabidopsis thaliana (Mouse-ear cress) PE=2 SV=2	S	Function unknown	PREDICTED: lysosomal Pro-X carboxypeptidase isoform X1 [Populus euphratica]
F01_transcript/3806	--	--	--	--	--	--	--	DENN (AEX-3) domain;; uDENN domain	--	S	Function unknown	hypothetical protein M437DRAFT_87450 [Aureobasidium melanogenum CBS 110374]
F01_transcript/2245	--	--	Molecular Function: actin filament binding (GO:0051015);; Biological Process: actin filament bundle assembly (GO:0051017);;	K05768|0|vvi:100254775|K05768 gelsolin | (RefSeq) villin-4	--	[Z]	Cytoskeleton	Gelsolin repeat;; Villin headpiece domain	Villin-4 {ECO:0000303|PubMed:10631247} OS=Arabidopsis thaliana (Mouse-ear cress) PE=1 SV=1	S	Function unknown	PREDICTED: villin-4 [Vitis vinifera]
F01_transcript/248	--	--	Biological Process: mRNA 5'-splice site recognition (GO:0000395);;	--	--	[A]	RNA processing and modification	Surp module;; Alternative splicing regulator	Probable splicing factor 3A subunit 1 GN=At1g14650 OS=Arabidopsis thaliana (Mouse-ear cress) PE=1 SV=2	A	RNA processing and modification	Splicing factor, suppressor of white-apricot [Gossypium arboreum]
F01_transcript/17159	--	--	Biological Process: regulation of cell adhesion (GO:0030155);; Molecular Function: ubiquitin protein ligase activity (GO:0061630);;	K15685|2.61845e-143|vvi:100244343|K15685 E3 ubiquitin-protein ligase Hakai [EC:2.3.2.27] | (RefSeq) E3 ubiquitin-protein ligase Hakai	--	[O]	Posttranslational modification, protein turnover, chaperones	--	--	O	Posttranslational modification, protein turnover, chaperones	PREDICTED: E3 ubiquitin-protein ligase Hakai [Vitis vinifera]
F01_transcript/21805	--	--	Cellular Component: cytoplasm (GO:0005737);; Biological Process: signal transduction (GO:0007165);; Biological Process: regulation of GTPase activity (GO:0043087);;	--	--	[T]	Signal transduction mechanisms	RhoGAP domain	Uncharacterized Rho GTPase-activating protein At5g61530 GN=At5g61530 OS=Arabidopsis thaliana (Mouse-ear cress) PE=1 SV=2	S	Function unknown	hypothetical protein POPTR_0004s24160g [Populus trichocarpa]
F01_transcript/23081	[T]	Signal transduction mechanisms	Molecular Function: phosphatidylinositol-4,5-bisphosphate 5-phosphatase activity (GO:0004439);; Molecular Function: protein tyrosine phosphatase activity (GO:0004725);; Molecular Function: protein tyrosine/serine/threonine phosphatase activity (GO:0008138);; Biological Process: peptidyl-tyrosine dephosphorylation (GO:0035335);;	--	--	[V]	Defense mechanisms	Dual specificity phosphatase, catalytic domain	Putative dual specificity protein phosphatase DSP8 GN=DSP8 OS=Arabidopsis thaliana (Mouse-ear cress) PE=2 SV=2	T	Signal transduction mechanisms	PREDICTED: putative dual specificity protein phosphatase DSP8 [Vitis vinifera]
F01_transcript/13537	--	--	--	--	--	--	--	HEAT repeats;; HEAT-like repeat;; HEAT repeat	Microtubule-associated protein TORTIFOLIA1 GN=T24A18.10 OS=Arabidopsis thaliana (Mouse-ear cress) PE=1 SV=2	S	Function unknown	PREDICTED: microtubule-associated protein TORTIFOLIA1 [Vitis vinifera]
F01_transcript/14519	[T]	Signal transduction mechanisms	Molecular Function: voltage-gated potassium channel activity (GO:0005249);; Cellular Component: integral component of plasma membrane (GO:0005887);; Biological Process: regulation of membrane potential (GO:0042391);; Biological Process: potassium ion transmembrane transport (GO:0071805);;	--	--	[PT]	--	Ion transport protein;; Cyclic nucleotide-binding domain	Cyclic nucleotide-gated ion channel 4 GN=MDK4.7 OS=Arabidopsis thaliana (Mouse-ear cress) PE=2 SV=2	U	Intracellular trafficking, secretion, and vesicular transport	PREDICTED: cyclic nucleotide-gated ion channel 4 [Sesamum indicum]
F01_transcript/3093	[P]	Inorganic ion transport and metabolism	Molecular Function: calcium-transporting ATPase activity (GO:0005388);; Molecular Function: ATP binding (GO:0005524);; Cellular Component: vacuole (GO:0005773);; Cellular Component: integral component of plasma membrane (GO:0005887);; Molecular Function: potassium-transporting ATPase activity (GO:0008556);; Molecular Function: metal ion binding (GO:0046872);; Biological Process: sequestering of c…	--	--	[P]	Inorganic ion transport and metabolism	Cation transporting ATPase, C-terminus;; haloacid dehalogenase-like hydrolase;; Cation transport ATPase (P-type);; haloacid dehalogenase-like hydrolase;; E1-E2 ATPase;; Cation transporter/ATPase, N-terminus	Calcium-transporting ATPase 1, plasma membrane-type OS=Oryza sativa subsp. japonica (Rice) PE=2 SV=1	P	Inorganic ion transport and metabolism	sodium transport ATPase 5 [Pyrenophora tritici-repentis Pt-1C-BFP]
F01_transcript/20603	--	--	--	--	--	--	--	Helix-loop-helix DNA-binding domain	Transcription factor bHLH66 GN=F27D4.17 OS=Arabidopsis thaliana (Mouse-ear cress) PE=2 SV=1	K	Transcription	PREDICTED: transcription factor UNE12-like isoform X2 [Vitis vinifera]
F01_transcript/7072	[J]	Translation, ribosomal structure and biogenesis	Molecular Function: translation elongation factor activity (GO:0003746);; Molecular Function: GTPase activity (GO:0003924);; Molecular Function: GTP binding (GO:0005525);; Cellular Component: mitochondrion (GO:0005739);; Cellular Component: chloroplast (GO:0009507);; Biological Process: mitochondrial translational elongation (GO:0070125);;	K02358|0|gmx:100791320|K02358 elongation factor Tu | (RefSeq) EF-Tu, tufB1; elongation factor Tu, chloroplastic	--	[J]	Translation, ribosomal structure and biogenesis	Elongation factor Tu GTP binding domain;; Elongation factor Tu C-terminal domain;; Elongation factor Tu domain 2	Elongation factor Tu, chloroplastic (Precursor) GN=TUFB1 OS=Glycine max (Soybean) PE=3 SV=1	J	Translation, ribosomal structure and biogenesis	RecName: Full=Elongation factor Tu, chloroplastic; Short=EF-Tu; Flags: Precursor [Glycine max]
F01_transcript/19299	[Q]	Secondary metabolites biosynthesis, transport and catabolism	Molecular Function: alditol:NADP+ 1-oxidoreductase activity (GO:0004032);; Molecular Function: iron ion binding (GO:0005506);; Cellular Component: cytoplasm (GO:0005737);; Biological Process: inositol catabolic process (GO:0019310);; Molecular Function: inositol oxygenase activity (GO:0050113);; Biological Process: oxidation-reduction process (GO:0055114);;	--	--	[R]	General function prediction only	Aldo/keto reductase family	Aldo-keto reductase family 4 member C10 GN=AKR4C10 OS=Arabidopsis thaliana (Mouse-ear cress) PE=1 SV=1	S	Function unknown	Inositol oxygenase 1 [Morus notabilis]
F01_transcript/3870	--	--	Cellular Component: intracellular membrane-bounded organelle (GO:0043231);; Cellular Component: cytoplasmic part (GO:0044444);;	K11267|0|mdm:103446819|K11267 sister chromatid cohesion protein PDS5 | (RefSeq) sister chromatid cohesion protein PDS5 homolog A	--	[D]	Cell cycle control, cell division, chromosome partitioning	--	DNA mismatch repair protein MSH6 GN=T10M13.8 OS=Arabidopsis thaliana (Mouse-ear cress) PE=1 SV=2	S	Function unknown	PREDICTED: sister chromatid cohesion protein PDS5 homolog B-like, partial [Vitis vinifera]
F01_transcript/4834	--	--	Molecular Function: actin filament binding (GO:0051015);; Biological Process: actin filament bundle assembly (GO:0051017);;	--	--	[Z]	Cytoskeleton	Gelsolin repeat	Villin-2 {ECO:0000303|PubMed:10631247} OS=Arabidopsis thaliana (Mouse-ear cress) PE=1 SV=2	S	Function unknown	hypothetical protein CISIN_1g002006mg [Citrus sinensis]
F01_transcript/22195	[C]	Energy production and conversion	Molecular Function: hydrolase activity, acting on carbon-nitrogen (but not peptide) bonds, in linear amides (GO:0016811);;	K01455|0|cit:102609334|K01455 formamidase [EC:3.5.1.49] | (RefSeq) formamidase-like	ko00460:Cyanoamino acid metabolism;ko00630:Glyoxylate and dicarboxylate metabolism;ko00910:Nitrogen metabolism;ko01200:Carbon metabolism	--	--	Acetamidase/Formamidase family	--	C	Energy production and conversion	PREDICTED: putative formamidase C869.04 isoform X2 [Vitis vinifera]
F01_transcript/28424	--	--	Molecular Function: nucleotide binding (GO:0000166);; Biological Process: mRNA splicing, via spliceosome (GO:0000398);; Cellular Component: U1 snRNP (GO:0005685);; Cellular Component: viral nucleocapsid (GO:0019013);; Molecular Function: U1 snRNA binding (GO:0030619);; Molecular Function: snRNA stem-loop binding (GO:0035614);;	K11094|1.97225e-108|cit:102621915|K11094 U2 small nuclear ribonucleoprotein B'' | (RefSeq) U2 small nuclear ribonucleoprotein B'' 2	ko03040:Spliceosome	[A]	RNA processing and modification	RNA recognition motif. (a.k.a. RRM, RBD, or RNP domain);; RNA recognition motif. (a.k.a. RRM, RBD, or RNP domain)	U2 small nuclear ribonucleoprotein B&apos;&apos; GN=U2B&apos;&apos; OS=Arabidopsis thaliana (Mouse-ear cress) PE=1 SV=1	S	Function unknown	PREDICTED: U2 small nuclear ribonucleoprotein B&apos;&apos; [Nicotiana tomentosiformis]
F01_transcript/17601	[L]	Replication, recombination and repair	--	--	--	--	--	Development and cell death domain	B2 protein OS=Daucus carota (Wild carrot) PE=2 SV=1	S	Function unknown	PREDICTED: uncharacterized protein LOC104602448 [Nelumbo nucifera]
F01_transcript/5106	[K]	Transcription	Molecular Function: transferase activity (GO:0016740);;	--	--	--	--	Protein kinase domain;; Leucine rich repeat;; Protein tyrosine kinase;; Leucine Rich repeats (2 copies);; Leucine Rich Repeat	Probable LRR receptor-like serine/threonine-protein kinase At3g47570 (Precursor) GN=At3g47570 OS=Arabidopsis thaliana (Mouse-ear cress) PE=2 SV=1	S	Function unknown	PREDICTED: probable LRR receptor-like serine/threonine-protein kinase At3g47570 [Vitis vinifera]
F01_transcript/19269	[G]	Carbohydrate transport and metabolism	Cellular Component: integral component of plasma membrane (GO:0005887);; Molecular Function: sucrose transmembrane transporter activity (GO:0008515);; Biological Process: sucrose transport (GO:0015770);;	--	--	[G]	Carbohydrate transport and metabolism	MFS/sugar transport protein	Sucrose transport protein OS=Spinacia oleracea (Spinach) PE=2 SV=1	U	Intracellular trafficking, secretion, and vesicular transport	sucrose carrier [Ricinus communis]
F01_transcript/27588	--	--	Biological Process: proteolysis (GO:0006508);; Molecular Function: NEDD8-specific protease activity (GO:0019784);;	--	--	[R]	General function prediction only	Ulp1 protease family, C-terminal catalytic domain	NEDD8-specific protease 1 GN=F15L12.8 OS=Arabidopsis thaliana (Mouse-ear cress) PE=2 SV=1	O	Posttranslational modification, protein turnover, chaperones	NEDD8-specific protease 1 [Morus notabilis]
F01_transcript/28154	--	--	Molecular Function: ATP binding (GO:0005524);; Cellular Component: nucleus (GO:0005634);; Cellular Component: cytoplasm (GO:0005737);; Biological Process: ubiquitin-dependent protein catabolic process (GO:0006511);; Cellular Component: integral component of membrane (GO:0016021);; Biological Process: protein ubiquitination (GO:0016567);; Molecular Function: ligase activity (GO:0016874);; Molecula…	K10575|1.33593e-59|crb:CARUB_v10017984mg|K10575 ubiquitin-conjugating enzyme E2 G1 [EC:2.3.2.23] | (RefSeq) hypothetical protein	ko04120:Ubiquitin mediated proteolysis;ko04141:Protein processing in endoplasmic reticulum	[O]	Posttranslational modification, protein turnover, chaperones	Ubiquitin-conjugating enzyme	Ubiquitin-conjugating enzyme E2 7 GN=UBC7 OS=Arabidopsis thaliana (Mouse-ear cress) PE=2 SV=1	O	Posttranslational modification, protein turnover, chaperones	PREDICTED: ubiquitin-conjugating enzyme E2 7 [Tarenaya hassleriana]
F01_transcript/13379	--	--	Molecular Function: protein serine/threonine kinase activity (GO:0004674);; Molecular Function: ATP binding (GO:0005524);; Biological Process: protein phosphorylation (GO:0006468);; Cellular Component: integral component of membrane (GO:0016021);;	--	--	--	--	Protein kinase domain;; Protein tyrosine kinase;; Leucine Rich repeats (2 copies);; Leucine rich repeat;; Leucine Rich Repeat;; Protein tyrosine kinase;; Protein kinase domain;; Leucine rich repeat N-terminal domain	Probable LRR receptor-like serine/threonine-protein kinase At5g10290 (Precursor) GN=At5g10290 OS=Arabidopsis thaliana (Mouse-ear cress) PE=2 SV=1	T	Signal transduction mechanisms	PREDICTED: probable LRR receptor-like serine/threonine-protein kinase At5g10290 [Sesamum indicum]
F01_transcript/17367	[M]	Cell wall/membrane/envelope biogenesis	Cellular Component: integral component of membrane (GO:0016021);; Molecular Function: transferase activity, transferring glycosyl groups (GO:0016757);;	--	--	[M]	Cell wall/membrane/envelope biogenesis	Glycosyl-transferase family 4;; Glycosyl transferases group 1;; Glycosyl transferases group 1	--	M	Cell wall/membrane/envelope biogenesis	hypothetical protein PHAVU_009G060600g [Phaseolus vulgaris]
F01_transcript/23545	--	--	Biological Process: ribosomal large subunit assembly (GO:0000027);; Biological Process: maturation of 5.8S rRNA (GO:0000460);; Biological Process: maturation of LSU-rRNA (GO:0000470);; Cellular Component: nucleolus (GO:0005730);; Cellular Component: cytosol (GO:0005829);; Biological Process: embryo development ending in seed dormancy (GO:0009793);; Cellular Component: preribosome, large subunit p…	K14846|0|mdm:103438005|K14846 ribosome production factor 1 | (RefSeq) ribosome production factor 1-like	--	[A]	RNA processing and modification	Brix domain	--	AJ	--	PREDICTED: ribosome production factor 1-like [Malus domestica]
F01_transcript/24471	--	--	Cellular Component: chloroplast (GO:0009507);; Cellular Component: chromoplast (GO:0009509);; Cellular Component: membrane (GO:0016020);; Molecular Function: 2-alkenal reductase [NAD(P)] activity (GO:0032440);; Biological Process: oxidation-reduction process (GO:0055114);;	--	--	--	--	PAP_fibrillin	Plastid-lipid-associated protein, chloroplastic (Precursor) GN=PAP OS=Citrus unshiu (Satsuma mandarin) PE=2 SV=1	S	Function unknown	hypothetical protein CICLE_v10015934mg [Citrus clementina]
F01_transcript/9718	[M]	Cell wall/membrane/envelope biogenesis	Molecular Function: protein kinase activity (GO:0004672);; Molecular Function: ATP binding (GO:0005524);; Biological Process: protein phosphorylation (GO:0006468);; Cellular Component: integral component of membrane (GO:0016021);; Molecular Function: 2-alkenal reductase [NAD(P)] activity (GO:0032440);; Biological Process: oxidation-reduction process (GO:0055114);;	--	--	--	--	Protein kinase domain;; Protein tyrosine kinase;; Leucine rich repeat N-terminal domain;; Leucine rich repeat;; Leucine Rich repeats (2 copies)	Probable LRR receptor-like serine/threonine-protein kinase At4g37250 (Precursor) GN=At4g37250 OS=Arabidopsis thaliana (Mouse-ear cress) PE=2 SV=1	T	Signal transduction mechanisms	PREDICTED: probable LRR receptor-like serine/threonine-protein kinase At4g37250 [Nicotiana sylvestris]
F01_transcript/19579	[IQ]	--	Molecular Function: acetate-CoA ligase activity (GO:0003987);; Biological Process: metabolic process (GO:0008152);; Molecular Function: o-succinylbenzoate-CoA ligase activity (GO:0008756);;	--	--	[I]	Lipid transport and metabolism	AMP-binding enzyme;; AMP-binding enzyme C-terminal domain	Probable acyl-activating enzyme 5, peroxisomal GN=MQK4.9 OS=Arabidopsis thaliana (Mouse-ear cress) PE=2 SV=1	IQ	--	PREDICTED: probable acyl-activating enzyme 5, peroxisomal isoform X1 [Vitis vinifera]
F01_transcript/26132	[A]	RNA processing and modification	Molecular Function: 3'-5'-exoribonuclease activity (GO:0000175);; Molecular Function: nucleic acid binding (GO:0003676);; Cellular Component: mitochondrion (GO:0005739);; Biological Process: nucleic acid phosphodiester bond hydrolysis (GO:0090305);;	K13288|4.61206e-96|sot:102587584|K13288 oligoribonuclease [EC:3.1.-.-] | (RefSeq) oligoribonuclease	ko03008:Ribosome biogenesis in eukaryotes	[A]	RNA processing and modification	Exonuclease	Oligoribonuclease GN=At2g26970 OS=Arabidopsis thaliana (Mouse-ear cress) PE=2 SV=2	A	RNA processing and modification	PREDICTED: oligoribonuclease-like [Solanum tuberosum]
F01_transcript/29931	[O]	Posttranslational modification, protein turnover, chaperones	--	K13993|1.19841e-64|vvi:100245734|K13993 HSP20 family protein | (RefSeq) 17.3 kDa class II heat shock protein	ko04141:Protein processing in endoplasmic reticulum	[O]	Posttranslational modification, protein turnover, chaperones	Hsp20/alpha crystallin family	17.3 kDa class II heat shock protein OS=Solanum peruvianum (Peruvian tomato) PE=2 SV=1	O	Posttranslational modification, protein turnover, chaperones	hypothetical protein VITISV_023364 [Vitis vinifera]
F01_transcript/10472	[T]	Signal transduction mechanisms	Molecular Function: protein kinase activity (GO:0004672);; Molecular Function: ATP binding (GO:0005524);; Biological Process: protein phosphorylation (GO:0006468);;	K14500|0|tcc:TCM_016247|K14500 BR-signaling kinase [EC:2.7.11.1] | (RefSeq) Kinase protein with tetratricopeptide repeat domain isoform 1	ko04075:Plant hormone signal transduction	--	--	Protein tyrosine kinase;; Protein kinase domain	Probable serine/threonine-protein kinase At5g41260 GN=At5g41260 OS=Arabidopsis thaliana (Mouse-ear cress) PE=1 SV=1	T	Signal transduction mechanisms	Kinase protein with tetratricopeptide repeat domain isoform 1 [Theobroma cacao]
F01_transcript/28935	--	--	Cellular Component: vacuolar membrane (GO:0005774);; Cellular Component: integral component of membrane (GO:0016021);;	--	--	--	--	Cold acclimation protein WCOR413	Cold-regulated 413 plasma membrane protein 2 GN=COR413PM2 OS=Arabidopsis thaliana (Mouse-ear cress) PE=2 SV=1	S	Function unknown	Cold-regulated 413-plasma membrane 2 isoform 1 [Theobroma cacao]
F01_transcript/23018	--	--	Molecular Function: aspartic-type endopeptidase activity (GO:0004190);; Biological Process: proteolysis (GO:0006508);; Cellular Component: plant-type cell wall (GO:0009505);; Cellular Component: chloroplast (GO:0009507);; Biological Process: protein catabolic process (GO:0030163);; Cellular Component: apoplast (GO:0048046);;	--	--	[O]	Posttranslational modification, protein turnover, chaperones	Xylanase inhibitor N-terminal;; Xylanase inhibitor C-terminal;; Eukaryotic aspartyl protease	Protein ASPARTIC PROTEASE IN GUARD CELL 2 (Precursor) GN=ASPG2 OS=Arabidopsis thaliana (Mouse-ear cress) PE=2 SV=1	O	Posttranslational modification, protein turnover, chaperones	hypothetical protein JCGZ_24539 [Jatropha curcas]
F01_transcript/33559	--	--	--	--	--	[S]	Function unknown	Translation machinery associated TMA7	--	S	Function unknown	PREDICTED: translation machinery-associated protein 7 homolog [Cucumis melo]
F01_transcript/27715	[O]	Posttranslational modification, protein turnover, chaperones	Molecular Function: threonine-type endopeptidase activity (GO:0004298);; Cellular Component: nucleus (GO:0005634);; Cellular Component: cytoplasm (GO:0005737);; Cellular Component: proteasome core complex (GO:0005839);; Biological Process: proteolysis involved in cellular protein catabolic process (GO:0051603);;	K02735|1.11637e-140|gmx:100306084|K02735 20S proteasome subunit beta 3 [EC:3.4.25.1] | (RefSeq) uncharacterized LOC100306084	ko03050:Proteasome	[O]	Posttranslational modification, protein turnover, chaperones	Proteasome subunit	Proteasome subunit beta type-3-A GN=F8K7.15 OS=Arabidopsis thaliana (Mouse-ear cress) PE=1 SV=2	O	Posttranslational modification, protein turnover, chaperones	PREDICTED: proteasome subunit beta type-3-A [Sesamum indicum]
F01_transcript/26846	--	--	Cellular Component: endoplasmic reticulum membrane (GO:0005789);; Cellular Component: plasma membrane (GO:0005886);;	--	--	[U]	Intracellular trafficking, secretion, and vesicular transport	MSP (Major sperm protein) domain	Vesicle-associated protein 4-1 GN=MJP23.9 OS=Arabidopsis thaliana (Mouse-ear cress) PE=2 SV=1	U	Intracellular trafficking, secretion, and vesicular transport	hypothetical protein POPTR_0001s41870g [Populus trichocarpa]
F01_transcript/25181	--	--	Molecular Function: nucleotide binding (GO:0000166);;	K13081|0|vvi:100232982|K13081 leucoanthocyanidin reductase [EC:1.17.1.3] | (RefSeq) LAR1; leucoanthocyanidin reductase 1	ko00941:Flavonoid biosynthesis	--	--	NmrA-like family;; NAD(P)H-binding;; NAD dependent epimerase/dehydratase family	Leucoanthocyanidin reductase GN=LAR OS=Desmodium uncinatum (Spanish clover) PE=1 SV=1	S	Function unknown	leucoanthocyanidin reductase [Vaccinium ashei]
F01_transcript/19527	[T]	Signal transduction mechanisms	Molecular Function: protein serine/threonine phosphatase activity (GO:0004722);; Biological Process: protein dephosphorylation (GO:0006470);; Molecular Function: metal ion binding (GO:0046872);;	K17499|0|fve:101301262|K17499 protein phosphatase 1G [EC:3.1.3.16] | (RefSeq) probable protein phosphatase 2C 60	--	[T]	Signal transduction mechanisms	Protein phosphatase 2C;; Stage II sporulation protein E (SpoIIE)	Probable protein phosphatase 2C 60 GN=At4g31860 OS=Arabidopsis thaliana (Mouse-ear cress) PE=2 SV=1	T	Signal transduction mechanisms	PREDICTED: probable protein phosphatase 2C 60 isoform X3 [Nelumbo nucifera]
F01_transcript/8894	[TK]	--	Biological Process: phosphorelay signal transduction system (GO:0000160);; Molecular Function: DNA binding (GO:0003677);; Molecular Function: transcription factor activity, sequence-specific DNA binding (GO:0003700);; Cellular Component: intracellular (GO:0005622);; Biological Process: regulation of transcription, DNA-templated (GO:0006355);; Biological Process: circumnutation (GO:0010031);; Biol…	K12127|0|vvi:100258790|K12127 pseudo-response regulator 1 | (RefSeq) two-component response regulator-like APRR1	ko04712:Circadian rhythm - plant	[K]	Transcription	Response regulator receiver domain;; CCT motif	Two-component response regulator-like APRR1 GN=MFB13.16 OS=Arabidopsis thaliana (Mouse-ear cress) PE=1 SV=1	K	Transcription	PREDICTED: two-component response regulator-like APRR1 [Vitis vinifera]
F01_transcript/31315	[J]	Translation, ribosomal structure and biogenesis	Molecular Function: structural constituent of ribosome (GO:0003735);; Cellular Component: ribosome (GO:0005840);; Biological Process: translation (GO:0006412);;	K02960|2.29122e-66|aly:ARALYDRAFT_488708|K02960 small subunit ribosomal protein S16e | (RefSeq) 40S ribosomal protein S16	ko03010:Ribosome	[J]	Translation, ribosomal structure and biogenesis	Ribosomal protein S9/S16	40S ribosomal protein S16 GN=RPS16 OS=Gossypium hirsutum (Upland cotton) PE=2 SV=1	J	Translation, ribosomal structure and biogenesis	ribosomal protein-like protein [Dothistroma septosporum NZE10]
F01_transcript/29399	--	--	Molecular Function: DNA binding (GO:0003677);; Molecular Function: transcription factor activity, sequence-specific DNA binding (GO:0003700);; Cellular Component: nucleus (GO:0005634);; Biological Process: regulation of transcription, DNA-templated (GO:0006355);;	K09286|4.21766e-38|vvi:100243603|K09286 EREBP-like factor | (RefSeq) ethylene-responsive transcription factor-like	--	--	--	AP2 domain	Ethylene-responsive transcription factor 4 GN=At3g15210 OS=Arabidopsis thaliana (Mouse-ear cress) PE=1 SV=1	K	Transcription	PREDICTED: ethylene-responsive transcription factor 4 [Vitis vinifera]
F01_transcript/18792	--	--	--	--	--	[R]	General function prediction only	Zinc finger, C2H2 type;; Zinc-finger double-stranded RNA-binding	Protein indeterminate-domain 7 {ECO:0000303|PubMed:16784536} OS=Arabidopsis thaliana (Mouse-ear cress) PE=2 SV=1	S	Function unknown	PREDICTED: zinc finger protein NUTCRACKER-like isoform X1 [Nelumbo nucifera]
F01_transcript/3679	--	--	Biological Process: cellular lipid metabolic process (GO:0044255);; Molecular Function: carboxylic ester hydrolase activity (GO:0052689);;	--	--	[S]	Function unknown	Putative serine esterase (DUF676);; Protein FAM135	--	S	Function unknown	PREDICTED: protein FAM135B-like isoform X2 [Vitis vinifera]
F01_transcript/17286	--	--	--	--	--	--	--	--	--	S	Function unknown	PREDICTED: uncharacterized protein LOC100261856 [Vitis vinifera]
F01_transcript/26656	[E]	Amino acid transport and metabolism	Cellular Component: cytoplasm (GO:0005737);; Biological Process: cysteine biosynthetic process from serine (GO:0006535);; Molecular Function: serine O-acetyltransferase activity (GO:0009001);;	K00640|4.61067e-113|pvu:PHAVU_010G110600g|K00640 serine O-acetyltransferase [EC:2.3.1.30] | (RefSeq) hypothetical protein	ko00270:Cysteine and methionine metabolism;ko00920:Sulfur metabolism;ko01200:Carbon metabolism;ko01230:Biosynthesis of amino acids	[E]	Amino acid transport and metabolism	Serine acetyltransferase, N-terminal	Serine acetyltransferase 5 GN=MIK19.23 OS=Arabidopsis thaliana (Mouse-ear cress) PE=1 SV=1	E	Amino acid transport and metabolism	PREDICTED: serine acetyltransferase 5-like [Nelumbo nucifera]
F01_transcript/26937	--	--	Cellular Component: cytosol (GO:0005829);;	K17607|5.8754e-159|vvi:100255906|K17607 type 2A phosphatase activator TIP41 | (RefSeq) TIP41-like protein	--	[S]	Function unknown	TIP41-like family	--	S	Function unknown	PREDICTED: TIP41-like protein [Vitis vinifera]
F01_transcript/31771	--	--	Molecular Function: structural constituent of ribosome (GO:0003735);; Cellular Component: ribosome (GO:0005840);; Biological Process: translation (GO:0006412);;	K02914|1.95157e-18|tcc:TCM_029722|K02914 large subunit ribosomal protein L34 | (RefSeq) 50S ribosomal protein L34	ko03010:Ribosome	--	--	Ribosomal protein L34	50S ribosomal protein L34, chloroplastic (Precursor) GN=RPL34 OS=Arabidopsis thaliana (Mouse-ear cress) PE=2 SV=1	J	Translation, ribosomal structure and biogenesis	50S ribosomal protein L34 [Theobroma cacao]
F01_transcript/1612	--	--	Molecular Function: thiol-dependent ubiquitin-specific protease activity (GO:0004843);; Biological Process: ubiquitin-dependent protein catabolic process (GO:0006511);; Molecular Function: zinc ion binding (GO:0008270);; Biological Process: protein deubiquitination (GO:0016579);;	K11835|1.91514e-46|vvi:100259769|K11835 ubiquitin carboxyl-terminal hydrolase 4/11/15 [EC:3.4.19.12] | (RefSeq) ubiquitin carboxyl-terminal hydrolase 9	--	[O]	Posttranslational modification, protein turnover, chaperones	DUSP domain	Ubiquitin carboxyl-terminal hydrolase 10 GN=UBP10 OS=Arabidopsis thaliana (Mouse-ear cress) PE=2 SV=2	O	Posttranslational modification, protein turnover, chaperones	PREDICTED: ubiquitin carboxyl-terminal hydrolase 9 [Vitis vinifera]
F01_transcript/5236	--	--	Cellular Component: synaptonemal complex (GO:0000795);; Biological Process: reciprocal meiotic recombination (GO:0007131);;	--	--	--	--	--	Putative WEB family protein At1g65010, chloroplastic (Precursor) GN=At1g65010 OS=Arabidopsis thaliana (Mouse-ear cress) PE=1 SV=1	S	Function unknown	PREDICTED: WEB family protein At3g02930, chloroplastic-like [Prunus mume]
F01_transcript/536	[T]	Signal transduction mechanisms	Molecular Function: phosphorelay sensor kinase activity (GO:0000155);; Biological Process: phosphorelay signal transduction system (GO:0000160);; Cellular Component: intracellular (GO:0005622);; Biological Process: response to osmotic stress (GO:0006970);; Biological Process: regulation of flower development (GO:0009909);; Biological Process: regulation of seed germination (GO:0010029);; Biologic…	K14489|0|vvi:100247122|K14489 arabidopsis histidine kinase 2/3/4 (cytokinin receptor) [EC:2.7.13.3] | (RefSeq) Cyt3; histidine kinase 3	ko04075:Plant hormone signal transduction	[T]	Signal transduction mechanisms	CHASE domain;; Histidine kinase-, DNA gyrase B-, and HSP90-like ATPase;; Response regulator receiver domain;; His Kinase A (phospho-acceptor) domain	Histidine kinase 3 GN=F17L21.11 OS=Arabidopsis thaliana (Mouse-ear cress) PE=1 SV=1	T	Signal transduction mechanisms	PREDICTED: histidine kinase 3 [Vitis vinifera]
F01_transcript/942	--	--	Biological Process: intracellular protein transport (GO:0006886);; Biological Process: ER to Golgi vesicle-mediated transport (GO:0006888);; Molecular Function: zinc ion binding (GO:0008270);; Cellular Component: COPII vesicle coat (GO:0030127);;	K14007|0|vvi:100265768|K14007 protein transport protein SEC24 | (RefSeq) protein transport protein Sec24-like At4g32640	ko04141:Protein processing in endoplasmic reticulum	[U]	Intracellular trafficking, secretion, and vesicular transport	Sec23/Sec24 trunk domain;; Sec23/Sec24 helical domain;; Sec23/Sec24 beta-sandwich domain;; Sec23/Sec24 zinc finger;; Gelsolin repeat	Protein transport protein Sec24-like At4g32640 GN=At4g32640 OS=Arabidopsis thaliana (Mouse-ear cress) PE=2 SV=3	U	Intracellular trafficking, secretion, and vesicular transport	PREDICTED: protein transport protein Sec24-like At4g32640 [Vitis vinifera]
F01_transcript/13347	[T]	Signal transduction mechanisms	Molecular Function: protein serine/threonine kinase activity (GO:0004674);; Molecular Function: ATP binding (GO:0005524);; Biological Process: protein phosphorylation (GO:0006468);;	K04733|0|sly:101257072|K04733 interleukin-1 receptor-associated kinase 4 [EC:2.7.11.1] | (RefSeq) probable receptor-like protein kinase At5g15080	--	[T]	Signal transduction mechanisms	Protein kinase domain;; Protein tyrosine kinase	Probable receptor-like protein kinase At5g15080 GN=At5g15080 OS=Arabidopsis thaliana (Mouse-ear cress) PE=2 SV=1	T	Signal transduction mechanisms	PREDICTED: probable receptor-like protein kinase At5g15080 [Nicotiana sylvestris]
F01_transcript/8738	[R]	General function prediction only	--	--	--	[S]	Function unknown	WD domain, G-beta repeat;; Anaphase-promoting complex subunit 4 WD40 domain	Protein Mut11 GN=Mut11 OS=Chlamydomonas reinhardtii (Chlamydomonas smithii) PE=2 SV=1	S	Function unknown	PREDICTED: protein tipD-like [Sesamum indicum]
F01_transcript/25472	--	--	Biological Process: mRNA splicing, via spliceosome (GO:0000398);; Molecular Function: RNA binding (GO:0003723);; Cellular Component: U5 snRNP (GO:0005682);; Cellular Component: U1 snRNP (GO:0005685);; Cellular Component: U2 snRNP (GO:0005686);; Cellular Component: U4 snRNP (GO:0005687);; Cellular Component: cytoplasm (GO:0005737);; Cellular Component: viral nucleocapsid (GO:0019013);; Cellular Co…	K11086|3.59322e-76|vvi:100257709|K11086 small nuclear ribonucleoprotein B and B' | (RefSeq) small nuclear ribonucleoprotein-associated protein B'-like	ko03040:Spliceosome	[K]	Transcription	LSM domain	Sm-like protein LSM3B {ECO:0000305} OS=Arabidopsis thaliana (Mouse-ear cress) PE=1 SV=1	K	Transcription	PREDICTED: small nuclear ribonucleoprotein-associated proteins B and B&apos; [Vitis vinifera]
F01_transcript/4375	[G]	Carbohydrate transport and metabolism	Molecular Function: catalytic activity (GO:0003824);;	K06617|0|pper:PRUPE_ppa001730mg|K06617 raffinose synthase [EC:2.4.1.82] | (RefSeq) hypothetical protein	ko00052:Galactose metabolism	--	--	Raffinose synthase or seed imbibition protein Sip1;; Raffinose synthase or seed imbibition protein Sip1;; Raffinose synthase or seed imbibition protein Sip1	Probable galactinol--sucrose galactosyltransferase 2 GN=T8H10.120 OS=Arabidopsis thaliana (Mouse-ear cress) PE=2 SV=2	S	Function unknown	JMS10C05.2 [Jatropha curcas]
F01_transcript/17214	[O]	Posttranslational modification, protein turnover, chaperones	Molecular Function: ATP binding (GO:0005524);; Cellular Component: cytosol (GO:0005829);; Biological Process: protein folding (GO:0006457);; Molecular Function: unfolded protein binding (GO:0051082);;	--	--	[O]	Posttranslational modification, protein turnover, chaperones	TCP-1/cpn60 chaperonin family	T-complex protein 1 subunit delta {ECO:0000303|PubMed:11599560} GN=MRC8 OS=Arabidopsis thaliana (Mouse-ear cress) PE=1 SV=1	O	Posttranslational modification, protein turnover, chaperones	PREDICTED: T-complex protein 1 subunit delta-like [Nelumbo nucifera]
F01_transcript/27607	[HR]	--	Biological Process: secondary shoot formation (GO:0010223);; Molecular Function: carboxylic ester hydrolase activity (GO:0052689);; Biological Process: strigolactone biosynthetic process (GO:1901601);;	--	--	--	--	alpha/beta hydrolase fold;; Alpha/beta hydrolase family	Probable strigolactone esterase DAD2 GN=DAD2 OS=Petunia hybrida (Petunia) PE=1 SV=1	S	Function unknown	PREDICTED: probable strigolactone esterase DAD2 [Vitis vinifera]
F01_transcript/12397	--	--	Cellular Component: Golgi apparatus (GO:0005794);; Biological Process: protein glycosylation (GO:0006486);; Cellular Component: integral component of membrane (GO:0016021);; Molecular Function: carbohydrate binding (GO:0030246);; Molecular Function: galactosylxylosylprotein 3-beta-galactosyltransferase activity (GO:0047220);;	--	--	[G]	Carbohydrate transport and metabolism	Galactoside-binding lectin;; Galactosyltransferase	Probable beta-1,3-galactosyltransferase 19 GN=B3GALT19 OS=Arabidopsis thaliana (Mouse-ear cress) PE=2 SV=2	S	Function unknown	PREDICTED: probable beta-1,3-galactosyltransferase 19 [Nelumbo nucifera]
F01_transcript/34001	[J]	Translation, ribosomal structure and biogenesis	Molecular Function: structural constituent of ribosome (GO:0003735);; Cellular Component: ribosome (GO:0005840);; Biological Process: translation (GO:0006412);; Molecular Function: rRNA binding (GO:0019843);;	K02949|2.63229e-36|tcc:TCM_038251|K02949 small subunit ribosomal protein S11e | (RefSeq) Ribosomal protein S11-beta	ko03010:Ribosome	[J]	Translation, ribosomal structure and biogenesis	Ribosomal protein S17	40S ribosomal protein S11 GN=RPS11 OS=Euphorbia esula (Leafy spurge) PE=2 SV=1	J	Translation, ribosomal structure and biogenesis	hypothetical protein CISIN_1g031480mg [Citrus sinensis]
F01_transcript/23448	[O]	Posttranslational modification, protein turnover, chaperones	Molecular Function: cysteine-type endopeptidase activity (GO:0004197);; Cellular Component: extracellular space (GO:0005615);; Cellular Component: lysosome (GO:0005764);; Biological Process: regulation of catalytic activity (GO:0050790);; Biological Process: proteolysis involved in cellular protein catabolic process (GO:0051603);;	K01363|0|pop:POPTR_0002s18510g|K01363 cathepsin B [EC:3.4.22.1] | (RefSeq) POPTRDRAFT_552399; putative cathepsin B-like protease family protein	--	[O]	Posttranslational modification, protein turnover, chaperones	Papain family cysteine protease;; Peptidase family C1 propeptide	Thiol protease aleurain-like (Precursor) GN=At3g45310 OS=Arabidopsis thaliana (Mouse-ear cress) PE=2 SV=1	O	Posttranslational modification, protein turnover, chaperones	PREDICTED: cathepsin B-like [Populus euphratica]
F01_transcript/343	--	--	--	--	--	--	--	Enhancer of polycomb-like	Histone-lysine N-methyltransferase ATX2 GN=T20M3.10 OS=Arabidopsis thaliana (Mouse-ear cress) PE=2 SV=1	S	Function unknown	PREDICTED: uncharacterized protein LOC100264575 [Vitis vinifera]
F01_transcript/29187	[J]	Translation, ribosomal structure and biogenesis	Biological Process: internal protein amino acid acetylation (GO:0006475);; Biological Process: N-terminal peptidyl-serine acetylation (GO:0017198);; Biological Process: N-terminal peptidyl-glutamic acid acetylation (GO:0018002);; Cellular Component: cytosolic ribosome (GO:0022626);; Cellular Component: NatA complex (GO:0031415);; Molecular Function: peptide-serine-N-acetyltransferase activity (GO…	K20791|3.46266e-105|cit:102607662|K20791 N-alpha-acetyltransferase 10/11 [EC:2.3.1.255] | (RefSeq) N-alpha-acetyltransferase daf-31	--	[R]	General function prediction only	Acetyltransferase (GNAT) family;; Acetyltransferase (GNAT) domain;; Acetyltransferase (GNAT) domain;; FR47-like protein	--	S	Function unknown	PREDICTED: N-terminal acetyltransferase A complex catalytic subunit ard1-like [Nelumbo nucifera]
F01_transcript/31961	--	--	Molecular Function: peroxidase activity (GO:0004601);; Cellular Component: extracellular region (GO:0005576);; Biological Process: response to oxidative stress (GO:0006979);; Cellular Component: plant-type cell wall (GO:0009505);; Biological Process: plant-type cell wall organization (GO:0009664);; Molecular Function: heme binding (GO:0020037);; Biological Process: hydrogen peroxide catabolic pro…	--	--	--	--	Peroxidase;; Peroxidase	Peroxidase 42 (Precursor) OS=Arabidopsis thaliana (Mouse-ear cress) PE=1 SV=2	G	Carbohydrate transport and metabolism	peroxidase [Camellia oleifera]
F01_transcript/14278	--	--	Biological Process: protein transport (GO:0015031);; Cellular Component: integral component of membrane (GO:0016021);;	K19995|1.11256e-69|pop:POPTR_0003s09810g|K19995 secretory carrier-associated membrane protein | (RefSeq) POPTRDRAFT_712356; secretory carrier membrane family protein	--	[U]	Intracellular trafficking, secretion, and vesicular transport	SCAMP family;; SCAMP family	Secretory carrier-associated membrane protein 4 GN=SCAMP4 OS=Arabidopsis thaliana (Mouse-ear cress) PE=2 SV=1	U	Intracellular trafficking, secretion, and vesicular transport	PREDICTED: secretory carrier-associated membrane protein 4 [Populus euphratica]
F01_transcript/27359	--	--	Molecular Function: SNARE binding (GO:0000149);; Molecular Function: SNAP receptor activity (GO:0005484);; Biological Process: intracellular protein transport (GO:0006886);; Biological Process: vesicle fusion (GO:0006906);; Cellular Component: endomembrane system (GO:0012505);; Cellular Component: integral component of membrane (GO:0016021);; Cellular Component: SNARE complex (GO:0031201);; Biolo…	K08503|1.57422e-90|cit:102608030|K08503 syntaxin of plants SYP5 | (RefSeq) syntaxin-51	ko04130:SNARE interactions in vesicular transport	[U]	Intracellular trafficking, secretion, and vesicular transport	SNARE domain	Syntaxin-52 GN=SYP52 OS=Arabidopsis thaliana (Mouse-ear cress) PE=1 SV=1	U	Intracellular trafficking, secretion, and vesicular transport	PREDICTED: syntaxin-51-like [Sesamum indicum]
F01_transcript/29274	[J]	Translation, ribosomal structure and biogenesis	Molecular Function: mRNA binding (GO:0003729);; Molecular Function: structural constituent of ribosome (GO:0003735);; Biological Process: translation (GO:0006412);; Cellular Component: cytosolic large ribosomal subunit (GO:0022625);;	K02872|9.2572e-105|fve:101309870|K02872 large subunit ribosomal protein L13Ae | (RefSeq) 60S ribosomal protein L13a-4	ko03010:Ribosome	[J]	Translation, ribosomal structure and biogenesis	Ribosomal protein L13	60S ribosomal protein L13a-4 GN=RPL13AD OS=Arabidopsis thaliana (Mouse-ear cress) PE=2 SV=1	J	Translation, ribosomal structure and biogenesis	PREDICTED: 60S ribosomal protein L13a-4-like isoform 1 [Cucumis sativus]
F01_transcript/17839	[M]	Cell wall/membrane/envelope biogenesis	Molecular Function: nucleotide binding (GO:0000166);; Molecular Function: protein kinase activity (GO:0004672);; Cellular Component: membrane (GO:0016020);; Biological Process: phosphorylation (GO:0016310);;	K04733|0|vvi:100258260|K04733 interleukin-1 receptor-associated kinase 4 [EC:2.7.11.1] | (RefSeq) rust resistance kinase Lr10-like	--	[T]	Signal transduction mechanisms	Protein kinase domain;; Protein tyrosine kinase;; Wall-associated receptor kinase galacturonan-binding	Probable receptor-like protein kinase At5g39020 (Precursor) GN=At5g39020 OS=Arabidopsis thaliana (Mouse-ear cress) PE=2 SV=1	T	Signal transduction mechanisms	PREDICTED: glycerophosphodiester phosphodiesterase protein kinase domain-containing GDPDL2-like [Populus euphratica]
F01_transcript/975	--	--	--	--	--	--	--	PHD-finger	PHD finger protein At2g01810 GN=At2g01810 OS=Arabidopsis thaliana (Mouse-ear cress) PE=3 SV=1	S	Function unknown	PREDICTED: uncharacterized protein LOC100244469 [Vitis vinifera]
F01_transcript/7272	--	--	--	--	--	[S]	Function unknown	--	--	L	Replication, recombination and repair	PREDICTED: uncharacterized protein LOC103320980 [Prunus mume]
F01_transcript/19875	--	--	--	--	--	[R]	General function prediction only	--	--	S	Function unknown	unnamed protein product [Vitis vinifera]
F01_transcript/14182	[H]	Coenzyme transport and metabolism	Molecular Function: 2-amino-4-hydroxy-6-hydroxymethyldihydropteridine diphosphokinase activity (GO:0003848);; Molecular Function: dihydropteroate synthase activity (GO:0004156);; Biological Process: folic acid-containing compound biosynthetic process (GO:0009396);; Molecular Function: kinase activity (GO:0016301);; Biological Process: phosphorylation (GO:0016310);;	K13941|0|cic:CICLE_v10031260mg|K13941 2-amino-4-hydroxy-6-hydroxymethyldihydropteridine diphosphokinase / dihydropteroate synthase [EC:2.7.6.3 2.5.1.15] | (RefSeq) hypothetical protein	ko00790:Folate biosynthesis	[H]	Coenzyme transport and metabolism	Pterin binding enzyme;; 7,8-dihydro-6-hydroxymethylpterin-pyrophosphokinase (HPPK)	--	H	Coenzyme transport and metabolism	PREDICTED: folic acid synthesis protein fol1 [Vitis vinifera]
F01_transcript/25686	--	--	Molecular Function: transferase activity (GO:0016740);;	--	--	[R]	General function prediction only	Sulfotransferase domain;; Sulfotransferase family	Cytosolic sulfotransferase 17 OS=Arabidopsis thaliana (Mouse-ear cress) PE=1 SV=1	S	Function unknown	PREDICTED: flavonol sulfotransferase-like [Nelumbo nucifera]
F01_transcript/21999	--	--	Biological Process: protein polyubiquitination (GO:0000209);; Molecular Function: zinc ion binding (GO:0008270);; Biological Process: protein ubiquitination involved in ubiquitin-dependent protein catabolic process (GO:0042787);; Biological Process: proteasome-mediated ubiquitin-dependent protein catabolic process (GO:0043161);; Biological Process: gametophyte development (GO:0048229);; Molecular…	K19043|4.65937e-144|vvi:100254749|K19043 E3 ubiquitin-protein ligase RHF [EC:2.3.2.27] | (RefSeq) E3 ubiquitin-protein ligase-like	--	[O]	Posttranslational modification, protein turnover, chaperones	Ring finger domain;; Zinc finger, C3HC4 type (RING finger);; RING-like zinc finger;; Zinc finger, C3HC4 type (RING finger)	E3 ubiquitin-protein ligase RHF2A GN=RHF2A OS=Arabidopsis thaliana (Mouse-ear cress) PE=2 SV=1	O	Posttranslational modification, protein turnover, chaperones	PREDICTED: E3 ubiquitin-protein ligase RHF2A [Vitis vinifera]
F01_transcript/29522	--	--	Biological Process: transcription, DNA-templated (GO:0006351);;	K09286|1.12945e-41|csv:101219005|K09286 EREBP-like factor | (RefSeq) ethylene-responsive transcription factor ERF011-like	--	--	--	AP2 domain	Ethylene-responsive transcription factor ERF008 GN=ERF008 OS=Arabidopsis thaliana (Mouse-ear cress) PE=2 SV=1	K	Transcription	ethylene response factor 2, partial [Diospyros kaki]
F01_transcript/15134	--	--	Cellular Component: endoplasmic reticulum (GO:0005783);; Cellular Component: Golgi apparatus (GO:0005794);; Molecular Function: lipid binding (GO:0008289);; Biological Process: protein secretion (GO:0009306);; Cellular Component: integral component of membrane (GO:0016021);;	--	--	[R]	General function prediction only	C2 domain;; Synaptotagmin-like mitochondrial-lipid-binding domain	Synaptotagmin-2 GN=T20H2.13 OS=Arabidopsis thaliana (Mouse-ear cress) PE=2 SV=1	S	Function unknown	PREDICTED: synaptotagmin-2 [Vitis vinifera]
F01_transcript/1941	[L]	Replication, recombination and repair	Molecular Function: nucleic acid binding (GO:0003676);; Molecular Function: helicase activity (GO:0004386);; Molecular Function: ATP binding (GO:0005524);; Cellular Component: viral nucleocapsid (GO:0019013);; Cellular Component: intracellular ribonucleoprotein complex (GO:0030529);;	K12854|0|vvi:100244096|K12854 pre-mRNA-splicing helicase BRR2 [EC:3.6.4.13] | (RefSeq) SNRNP200; DExH-box ATP-dependent RNA helicase DExH12	ko03040:Spliceosome	[A]	RNA processing and modification	Sec63 Brl domain;; DEAD/DEAH box helicase;; Type III restriction enzyme, res subunit;; Sec63 Brl domain	Helicase and polymerase-containing protein TEBICHI GN=TEB OS=Arabidopsis thaliana (Mouse-ear cress) PE=2 SV=1	L	Replication, recombination and repair	PREDICTED: U5 small nuclear ribonucleoprotein 200 kDa helicase [Vitis vinifera]
F01_transcript/13847	[HT]	--	Molecular Function: protein kinase activity (GO:0004672);; Molecular Function: ATP binding (GO:0005524);; Biological Process: protein phosphorylation (GO:0006468);; Cellular Component: plastoglobule (GO:0010287);; Biological Process: protein stabilization (GO:0050821);; Biological Process: regulation of tocopherol cyclase activity (GO:1902171);;	K08869|0|sot:102593860|K08869 aarF domain-containing kinase | (RefSeq) uncharacterized aarF domain-containing protein kinase At1g79600, chloroplastic	--	[R]	General function prediction only	ABC1 family	Uncharacterized aarF domain-containing protein kinase At1g79600, chloroplastic (Precursor) GN=At1g79600 OS=Arabidopsis thaliana (Mouse-ear cress) PE=2 SV=1	S	Function unknown	PREDICTED: uncharacterized aarF domain-containing protein kinase At1g79600, chloroplastic-like [Solanum tuberosum]
F01_transcript/28178	--	--	Biological Process: flavonoid biosynthetic process (GO:0009813);; Molecular Function: chalcone isomerase activity (GO:0045430);;	K01859|1.7667e-83|fve:101292744|K01859 chalcone isomerase [EC:5.5.1.6] | (RefSeq) chalcone--flavonone isomerase 1	ko00941:Flavonoid biosynthesis	--	--	Chalcone-flavanone isomerase;; Chalcone-flavanone isomerase	Chalcone--flavonone isomerase GN=CHI OS=Elaeagnus umbellata (Autumn olive) PE=2 SV=1	G	Carbohydrate transport and metabolism	RecName: Full=Chalcone--flavonone isomerase; Short=Chalcone isomerase [Elaeagnus umbellata]
F01_transcript/3894	[P]	Inorganic ion transport and metabolism	Molecular Function: ATP binding (GO:0005524);; Cellular Component: integral component of plasma membrane (GO:0005887);; Biological Process: ATP biosynthetic process (GO:0006754);; Molecular Function: hydrogen-exporting ATPase activity, phosphorylative mechanism (GO:0008553);; Cellular Component: intracellular membrane-bounded organelle (GO:0043231);; Molecular Function: metal ion binding (GO:0046…	K01535|0|pop:POPTR_0012s07350g|K01535 H+-transporting ATPase [EC:3.6.3.6] | (RefSeq) POPTRDRAFT_422528; putative plasma membrane H+ ATPase family protein	ko00190:Oxidative phosphorylation	[P]	Inorganic ion transport and metabolism	E1-E2 ATPase;; haloacid dehalogenase-like hydrolase;; Cation transporter/ATPase, N-terminus;; haloacid dehalogenase-like hydrolase	Plasma membrane ATPase 1 GN=PMA1 OS=Nicotiana plumbaginifolia (Leadwort-leaved tobacco) PE=2 SV=1	P	Inorganic ion transport and metabolism	hypothetical protein JCGZ_11571 [Jatropha curcas]
F01_transcript/4134	--	--	Molecular Function: nucleotide binding (GO:0000166);; Cellular Component: nucleus (GO:0005634);; Molecular Function: microtubule-severing ATPase activity (GO:0008568);; Biological Process: cytoplasmic microtubule organization (GO:0031122);;	--	--	--	--	FHA domain	--	O	Posttranslational modification, protein turnover, chaperones	unnamed protein product [Coffea canephora]
F01_transcript/13389	--	--	--	--	--	[R]	General function prediction only	PPR repeat family;; PPR repeat;; PPR repeat;; Pentatricopeptide repeat domain;; Pentacotripeptide-repeat region of PRORP	Pentatricopeptide repeat-containing protein At2g36980, mitochondrial (Precursor) GN=PCMP-E73 OS=Arabidopsis thaliana (Mouse-ear cress) PE=2 SV=1	S	Function unknown	PREDICTED: pentatricopeptide repeat-containing protein At2g36980, mitochondrial [Vitis vinifera]
F01_transcript/17398	--	--	Biological Process: microtubule cytoskeleton organization (GO:0000226);; Biological Process: cytokinesis (GO:0000910);; Molecular Function: microtubule binding (GO:0008017);;	K16732|0|vvi:100267550|K16732 protein regulator of cytokinesis 1 | (RefSeq) 65-kDa microtubule-associated protein 1-like	--	[DZ]	--	Microtubule associated protein (MAP65/ASE1 family)	65-kDa microtubule-associated protein 1 GN=MAP65-1 OS=Arabidopsis thaliana (Mouse-ear cress) PE=1 SV=1	S	Function unknown	PREDICTED: LOW QUALITY PROTEIN: 65-kDa microtubule-associated protein 1-like [Vitis vinifera]
F01_transcript/18699	--	--	Biological Process: proteolysis (GO:0006508);; Molecular Function: peptidase activity (GO:0008233);; Molecular Function: zinc ion binding (GO:0008270);; Cellular Component: integral component of membrane (GO:0016021);; Molecular Function: ligase activity (GO:0016874);;	K15692|4.41096e-174|pop:POPTR_0019s11200g|K15692 E3 ubiquitin-protein ligase RNF13 [EC:2.3.2.27] | (RefSeq) POPTRDRAFT_1108425; hypothetical protein	--	[O]	Posttranslational modification, protein turnover, chaperones	Ring finger domain;; RING-like zinc finger;; PA domain;; Zinc finger, C3HC4 type (RING finger);; Zinc finger, C3HC4 type (RING finger)	Receptor homology region, transmembrane domain- and RING domain-containing protein 2 (Precursor) GN=F17M19.13 OS=Arabidopsis thaliana (Mouse-ear cress) PE=2 SV=1	O	Posttranslational modification, protein turnover, chaperones	PREDICTED: receptor homology region, transmembrane domain- and RING domain-containing protein 2-like isoform X2 [Populus euphratica]
F01_transcript/3464	[K]	Transcription	Molecular Function: DNA binding (GO:0003677);; Molecular Function: DNA ligase (ATP) activity (GO:0003910);; Molecular Function: NAD+ ADP-ribosyltransferase activity (GO:0003950);; Cellular Component: nucleus (GO:0005634);; Cellular Component: cytoplasm (GO:0005737);; Biological Process: lagging strand elongation (GO:0006273);; Biological Process: protein ADP-ribosylation (GO:0006471);; Molecular …	K10798|0|vvi:100261796|K10798 poly [ADP-ribose] polymerase [EC:2.4.2.30] | (RefSeq) poly [ADP-ribose] polymerase 1	ko03410:Base excision repair	[KLO]	--	Poly(ADP-ribose) polymerase catalytic domain;; Poly(ADP-ribose) polymerase and DNA-Ligase Zn-finger region;; Poly(ADP-ribose) polymerase, regulatory domain;; PADR1 (NUC008) domain;; WGR domain;; BRCA1 C Terminus (BRCT) domain	Poly [ADP-ribose] polymerase 1 GN=PARP1 OS=Arabidopsis thaliana (Mouse-ear cress) PE=1 SV=2	S	Function unknown	PREDICTED: poly [ADP-ribose] polymerase 1 [Vitis vinifera]
F01_transcript/21628	--	--	--	--	--	--	--	--	--	S	Function unknown	hypothetical protein CICLE_v10015391mg [Citrus clementina]
F01_transcript/4620	[T]	Signal transduction mechanisms	Molecular Function: protein kinase activity (GO:0004672);; Molecular Function: ubiquitin-protein transferase activity (GO:0004842);; Molecular Function: ATP binding (GO:0005524);; Biological Process: protein phosphorylation (GO:0006468);; Biological Process: protein ubiquitination (GO:0016567);;	--	--	--	--	U-box domain	U-box domain-containing protein 32 GN=PUB32 OS=Arabidopsis thaliana (Mouse-ear cress) PE=2 SV=1	T	Signal transduction mechanisms	PREDICTED: U-box domain-containing protein 32 isoform X1 [Vitis vinifera]
F01_transcript/2193	[P]	Inorganic ion transport and metabolism	Molecular Function: ATP binding (GO:0005524);; Cellular Component: endoplasmic reticulum (GO:0005783);; Cellular Component: integral component of plasma membrane (GO:0005887);; Molecular Function: cation-transporting ATPase activity (GO:0019829);; Molecular Function: metal ion binding (GO:0046872);; Biological Process: cation transmembrane transport (GO:0098655);;	K01537|0|vvi:100243325|K01537 Ca2+-transporting ATPase [EC:3.6.3.8] | (RefSeq) calcium-transporting ATPase 4, endoplasmic reticulum-type	--	[P]	Inorganic ion transport and metabolism	E1-E2 ATPase;; Cation transporting ATPase, C-terminus;; haloacid dehalogenase-like hydrolase;; Cation transporter/ATPase, N-terminus;; Cation transport ATPase (P-type);; haloacid dehalogenase-like hydrolase	Calcium-transporting ATPase 4, endoplasmic reticulum-type GN=ECA4 OS=Arabidopsis thaliana (Mouse-ear cress) PE=2 SV=2	P	Inorganic ion transport and metabolism	Calcium-transporting ATPase 1, endoplasmic reticulum-type [Morus notabilis]
F01_transcript/14306	[F]	Nucleotide transport and metabolism	Molecular Function: dihydrofolate reductase activity (GO:0004146);; Molecular Function: thymidylate synthase activity (GO:0004799);; Biological Process: dTMP biosynthetic process (GO:0006231);; Biological Process: glycine biosynthetic process (GO:0006545);; Biological Process: one-carbon metabolic process (GO:0006730);; Biological Process: methylation (GO:0032259);; Biological Process: tetrahydro…	K13998|0|pxb:103967122|K13998 dihydrofolate reductase / thymidylate synthase [EC:1.5.1.3 2.1.1.45] | (RefSeq) bifunctional dihydrofolate reductase-thymidylate synthase-like	ko00240:Pyrimidine metabolism;ko00670:One carbon pool by folate;ko00790:Folate biosynthesis	[F]	Nucleotide transport and metabolism	Thymidylate synthase;; Dihydrofolate reductase	Thymidylate synthase OS=Daucus carota (Wild carrot) PE=2 SV=1	H	Coenzyme transport and metabolism	hypothetical protein JCGZ_26783 [Jatropha curcas]
F01_transcript/28655	--	--	Cellular Component: membrane (GO:0016020);;	--	--	--	--	Late embryogenesis abundant protein	Protein YLS9 GN=F11F19.11 OS=Arabidopsis thaliana (Mouse-ear cress) PE=2 SV=1	S	Function unknown	hin1 like protein [Capsicum chinense]
F01_transcript/7135	--	--	Biological Process: protein targeting to Golgi (GO:0000042);; Cellular Component: synaptonemal complex (GO:0000795);; Cellular Component: trans-Golgi network (GO:0005802);; Biological Process: reciprocal meiotic recombination (GO:0007131);;	--	--	--	--	GRIP domain	Protein GRIP GN=GRIP OS=Arabidopsis thaliana (Mouse-ear cress) PE=1 SV=2	S	Function unknown	PREDICTED: protein GRIP [Vitis vinifera]
F01_transcript/24991	--	--	Cellular Component: integral component of membrane (GO:0016021);;	--	--	--	--	Family of unknown function (DUF716)	--	S	Function unknown	PREDICTED: uncharacterized protein LOC104592700 [Nelumbo nucifera]
F01_transcript/22495	--	--	--	--	--	--	--	--	--	S	Function unknown	PREDICTED: uncharacterized protein LOC104609781 isoform X2 [Nelumbo nucifera]
F01_transcript/18229	--	--	--	--	--	--	--	--	Coiled-coil domain-containing protein SCD2 {ECO:0000305} OS=Arabidopsis thaliana (Mouse-ear cress) PE=1 SV=1	S	Function unknown	PREDICTED: uncharacterized protein LOC100260846 [Vitis vinifera]
F01_transcript/9074	--	--	Molecular Function: actin binding (GO:0003779);; Molecular Function: protein tyrosine phosphatase activity (GO:0004725);; Molecular Function: protein tyrosine/serine/threonine phosphatase activity (GO:0008138);; Molecular Function: kinase activity (GO:0016301);; Biological Process: phosphorylation (GO:0016310);; Biological Process: peptidyl-tyrosine dephosphorylation (GO:0035335);;	--	--	[V]	Defense mechanisms	Dual specificity phosphatase, catalytic domain	Protein-tyrosine-phosphatase MKP1 GN=MKP1 OS=Arabidopsis thaliana (Mouse-ear cress) PE=1 SV=1	T	Signal transduction mechanisms	PREDICTED: protein-tyrosine-phosphatase MKP1-like [Vitis vinifera]
F01_transcript/24551	--	--	--	--	--	--	--	Methyl-CpG binding domain	Methyl-CpG-binding domain-containing protein 10 GN=MBD10 OS=Arabidopsis thaliana (Mouse-ear cress) PE=1 SV=1	S	Function unknown	PREDICTED: methyl-CpG-binding domain-containing protein 11 [Sesamum indicum]
F01_transcript/30595	--	--	Cellular Component: endoplasmic reticulum (GO:0005783);; Biological Process: lipid transport (GO:0006869);; Molecular Function: lipid binding (GO:0008289);; Cellular Component: plant-type cell wall (GO:0009505);; Cellular Component: integral component of membrane (GO:0016021);; Biological Process: cuticle development (GO:0042335);; Cellular Component: anchored component of plasma membrane (GO:004…	--	--	--	--	Probable lipid transfer;; Protease inhibitor/seed storage/LTP family	Non-specific lipid transfer protein GPI-anchored 1 (Precursor) GN=LTPG1 OS=Arabidopsis thaliana (Mouse-ear cress) PE=1 SV=1	U	Intracellular trafficking, secretion, and vesicular transport	hypothetical protein VITISV_027707 [Vitis vinifera]
F01_transcript/9497	[O]	Posttranslational modification, protein turnover, chaperones	Molecular Function: metalloendopeptidase activity (GO:0004222);; Molecular Function: ATP binding (GO:0005524);; Biological Process: proteolysis (GO:0006508);; Molecular Function: microtubule-severing ATPase activity (GO:0008568);; Cellular Component: membrane (GO:0016020);;	K08955|0|vvi:100252645|K08955 ATP-dependent metalloprotease [EC:3.4.24.-] | (RefSeq) ATP-dependent zinc metalloprotease FTSH 4, mitochondrial	--	[O]	Posttranslational modification, protein turnover, chaperones	Peptidase family M41;; ATPase family associated with various cellular activities (AAA);; AAA domain (dynein-related subfamily);; TIP49 C-terminus;; Holliday junction DNA helicase ruvB N-terminus	ATP-dependent zinc metalloprotease FTSH 4, mitochondrial (Precursor) GN=FTSH4 OS=Arabidopsis thaliana (Mouse-ear cress) PE=1 SV=2	O	Posttranslational modification, protein turnover, chaperones	PREDICTED: ATP-dependent zinc metalloprotease FTSH 4, mitochondrial [Vitis vinifera]
F01_transcript/5983	[P]	Inorganic ion transport and metabolism	Cellular Component: plasma membrane (GO:0005886);; Molecular Function: potassium ion transmembrane transporter activity (GO:0015079);; Cellular Component: integral component of membrane (GO:0016021);; Biological Process: potassium ion transmembrane transport (GO:0071805);;	K03549|0|vvi:100232992|K03549 KUP system potassium uptake protein | (RefSeq) KUP2	--	--	--	K+ potassium transporter	Potassium transporter 2 GN=T2P4.11 OS=Arabidopsis thaliana (Mouse-ear cress) PE=1 SV=2	P	Inorganic ion transport and metabolism	PREDICTED: KUP2 isoform X1 [Vitis vinifera]
F01_transcript/2194	[MDT]	--	Molecular Function: ATP binding (GO:0005524);;	--	--	[O]	Posttranslational modification, protein turnover, chaperones	ATPase family associated with various cellular activities (AAA);; Holliday junction DNA helicase ruvB N-terminus	Katanin p60 ATPase-containing subunit A1 {ECO:0000255|HAMAP-Rule:MF_03023} GN=At1g80350 OS=Arabidopsis thaliana (Mouse-ear cress) PE=1 SV=1	O	Posttranslational modification, protein turnover, chaperones	PREDICTED: uncharacterized protein LOC102611598 isoform X6 [Citrus sinensis]
F01_transcript/29883	--	--	--	K00799|1.05355e-33|vvi:100254124|K00799 glutathione S-transferase [EC:2.5.1.18] | (RefSeq) glutathione transferase GST 23	ko00480:Glutathione metabolism	[O]	Posttranslational modification, protein turnover, chaperones	--	Glutathione S-transferase U8 GN=GSTU8 OS=Arabidopsis thaliana (Mouse-ear cress) PE=2 SV=1	O	Posttranslational modification, protein turnover, chaperones	hypothetical protein VITISV_006850 [Vitis vinifera]
F01_transcript/20433	--	--	Biological Process: ubiquitin-dependent protein catabolic process (GO:0006511);;	--	--	[O]	Posttranslational modification, protein turnover, chaperones	Skp1 family, dimerisation domain;; Skp1 family, tetramerisation domain	SKP1-like protein 21 GN=ASK21 OS=Arabidopsis thaliana (Mouse-ear cress) PE=2 SV=1	O	Posttranslational modification, protein turnover, chaperones	SKP1-like protein 21 isoform 2 [Theobroma cacao]
F01_transcript/26366	--	--	Cellular Component: THO complex part of transcription export complex (GO:0000445);; Cellular Component: nucleoplasmic THO complex (GO:0000446);; Cellular Component: chromosome, telomeric region (GO:0000781);; Molecular Function: nucleic acid binding (GO:0003676);; Biological Process: transcription elongation from RNA polymerase II promoter (GO:0006368);; Biological Process: mRNA processing (GO:00…	K13176|1.22942e-136|vvi:100256436|K13176 THO complex subunit 7 | (RefSeq) THO complex subunit 7A	ko03013:RNA transport	[S]	Function unknown	Tho complex subunit 7	THO complex subunit 7A GN=F5E19.130 OS=Arabidopsis thaliana (Mouse-ear cress) PE=1 SV=1	S	Function unknown	PREDICTED: THO complex subunit 7A [Sesamum indicum]
F01_transcript/20346	--	--	Molecular Function: anthranilate N-benzoyltransferase activity (GO:0047672);;	--	--	--	--	Transferase family	BAHD acyltransferase DCR GN=MRO11.2 OS=Arabidopsis thaliana (Mouse-ear cress) PE=2 SV=1	S	Function unknown	anthocyanin 5-aromatic acyltransferase [Vaccinium dunalianum]
F01_transcript/19038	[V]	Defense mechanisms	Biological Process: drug transmembrane transport (GO:0006855);; Molecular Function: drug transmembrane transporter activity (GO:0015238);; Molecular Function: antiporter activity (GO:0015297);; Cellular Component: integral component of membrane (GO:0016021);;	K03327|0|vvi:100262938|K03327 multidrug resistance protein, MATE family | (RefSeq) protein DETOXIFICATION 51	--	[R]	General function prediction only	MatE;; MatE	MATE efflux family protein 5 GN=F3L12.12 OS=Arabidopsis thaliana (Mouse-ear cress) PE=3 SV=1	V	Defense mechanisms	PREDICTED: MATE efflux family protein 5 [Vitis vinifera]
F01_transcript/25913	[C]	Energy production and conversion	Molecular Function: FMN binding (GO:0010181);; Molecular Function: oxidoreductase activity (GO:0016491);; Biological Process: negative regulation of transcription, DNA-templated (GO:0045892);; Biological Process: oxidation-reduction process (GO:0055114);;	K03809|3.32807e-82|mdm:103426815|K03809 NAD(P)H dehydrogenase (quinone) [EC:1.6.5.2] | (RefSeq) probable NAD(P)H dehydrogenase (quinone) FQR1-like 2	ko00130:Ubiquinone and other terpenoid-quinone biosynthesis	[R]	General function prediction only	--	Probable NAD(P)H dehydrogenase (quinone) FQR1-like 2 {ECO:0000305} OS=Arabidopsis thaliana (Mouse-ear cress) PE=1 SV=1	S	Function unknown	PREDICTED: LOW QUALITY PROTEIN: minor allergen Alt a 7-like [Malus domestica]
F01_transcript/1305	--	--	--	--	--	--	--	--	--	S	Function unknown	PREDICTED: uncharacterized protein LOC104879533 [Vitis vinifera]
F01_transcript/32686	--	--	Molecular Function: cysteine-type endopeptidase inhibitor activity (GO:0004869);; Molecular Function: peptidase activity (GO:0008233);; Biological Process: negative regulation of endopeptidase activity (GO:0010951);;	--	--	--	--	--	Cysteine proteinase inhibitor OS=Vigna unguiculata (Cowpea) PE=3 SV=1	S	Function unknown	cystein proteinase inhibitor [Arachis hypogaea]
F01_transcript/28151	--	--	Cellular Component: mitochondrion (GO:0005739);; Biological Process: protein folding (GO:0006457);; Molecular Function: zinc ion binding (GO:0008270);; Biological Process: protein import into mitochondrial matrix (GO:0030150);; Biological Process: protein stabilization (GO:0050821);; Molecular Function: chaperone binding (GO:0051087);;	K17808|5.48059e-69|vvi:100243759|K17808 mitochondrial protein import protein ZIM17 | (RefSeq) uncharacterized LOC100243759	--	[S]	Function unknown	DNL zinc finger	--	S	Function unknown	PREDICTED: uncharacterized protein LOC100243759 [Vitis vinifera]
F01_transcript/26959	--	--	--	--	--	--	--	Protein of unknown function, DUF538	--	S	Function unknown	PREDICTED: uncharacterized protein LOC101268745 [Solanum lycopersicum]
F01_transcript/15145	[T]	Signal transduction mechanisms	Molecular Function: protein kinase activity (GO:0004672);; Molecular Function: ATP binding (GO:0005524);; Cellular Component: plasma membrane (GO:0005886);; Biological Process: protein phosphorylation (GO:0006468);; Cellular Component: integral component of membrane (GO:0016021);;	--	--	--	--	Protein tyrosine kinase;; Protein kinase domain;; Leucine Rich repeats (2 copies);; Leucine rich repeat;; Leucine rich repeat N-terminal domain	Probable leucine-rich repeat receptor-like protein kinase At1g68400 (Precursor) GN=At1g68400 OS=Arabidopsis thaliana (Mouse-ear cress) PE=2 SV=1	T	Signal transduction mechanisms	PREDICTED: probable leucine-rich repeat receptor-like protein kinase At1g68400 [Vitis vinifera]
F01_transcript/19724	[T]	Signal transduction mechanisms	Molecular Function: protein serine/threonine phosphatase activity (GO:0004722);; Biological Process: protein dephosphorylation (GO:0006470);; Molecular Function: metal ion binding (GO:0046872);;	K17499|2.52108e-180|fve:101301262|K17499 protein phosphatase 1G [EC:3.1.3.16] | (RefSeq) probable protein phosphatase 2C 60	--	[T]	Signal transduction mechanisms	Protein phosphatase 2C;; Stage II sporulation protein E (SpoIIE);; Protein phosphatase 2C	Probable protein phosphatase 2C 58 OS=Oryza sativa subsp. japonica (Rice) PE=2 SV=1	T	Signal transduction mechanisms	PREDICTED: probable protein phosphatase 2C 60 isoform X3 [Nelumbo nucifera]
F01_transcript/8020	[V]	Defense mechanisms	Biological Process: drug transmembrane transport (GO:0006855);; Molecular Function: drug transmembrane transporter activity (GO:0015238);; Molecular Function: antiporter activity (GO:0015297);; Cellular Component: integral component of membrane (GO:0016021);;	--	--	[R]	General function prediction only	MatE;; Polysaccharide biosynthesis C-terminal domain	MATE efflux family protein 3, chloroplastic (Precursor) GN=DTX45 OS=Arabidopsis thaliana (Mouse-ear cress) PE=2 SV=2	V	Defense mechanisms	unnamed protein product [Coffea canephora]
F01_transcript/32396	--	--	--	--	--	--	--	--	--	S	Function unknown	PREDICTED: uncharacterized protein LOC101243970 [Solanum lycopersicum]
F01_transcript/21676	[Q]	Secondary metabolites biosynthesis, transport and catabolism	Molecular Function: diacylglycerol O-acyltransferase activity (GO:0004144);; Cellular Component: plasma membrane (GO:0005886);; Biological Process: triglyceride biosynthetic process (GO:0019432);; Molecular Function: long-chain-alcohol O-fatty-acyltransferase activity (GO:0047196);;	--	--	--	--	Protein of unknown function (DUF1298);; Wax ester synthase-like Acyl-CoA acyltransferase domain	O-acyltransferase WSD1 GN=WSD1 OS=Arabidopsis thaliana (Mouse-ear cress) PE=2 SV=1	S	Function unknown	PREDICTED: O-acyltransferase WSD1 isoform X1 [Vitis vinifera]
F01_transcript/2074	[KL]	--	Molecular Function: catalytic activity (GO:0003824);; Molecular Function: ATP binding (GO:0005524);; Molecular Function: zinc ion binding (GO:0008270);;	--	--	[KL]	--	SNF2 family N-terminal domain;; Helicase conserved C-terminal domain	Putative SWI/SNF-related matrix-associated actin-dependent regulator of chromatin subfamily A member 3-like 2 GN=At5g22750 OS=Arabidopsis thaliana (Mouse-ear cress) PE=2 SV=1	L	Replication, recombination and repair	PREDICTED: uncharacterized ATP-dependent helicase C23E6.02 [Vitis vinifera]
F01_transcript/8733	--	--	--	--	--	--	--	Plant protein of unknown function (DUF863)	--	S	Function unknown	hypothetical protein RCOM_1470750 [Ricinus communis]
F01_transcript/29643	--	--	Cellular Component: nucleus (GO:0005634);; Cellular Component: cytoplasm (GO:0005737);; Biological Process: postreplication repair (GO:0006301);; Molecular Function: ligase activity (GO:0016874);; Molecular Function: ubiquitin protein ligase binding (GO:0031625);; Molecular Function: ubiquitin protein ligase activity (GO:0061630);; Biological Process: protein K63-linked ubiquitination (GO:0070534…	K10704|7.79108e-72|gmx:100816570|K10704 ubiquitin-conjugating enzyme E2 variant | (RefSeq) ubiquitin-conjugating enzyme E2 variant 1D	--	[O]	Posttranslational modification, protein turnover, chaperones	Ubiquitin-conjugating enzyme	Ubiquitin-conjugating enzyme E2 variant 1D GN=F22O6.60 OS=Arabidopsis thaliana (Mouse-ear cress) PE=1 SV=1	O	Posttranslational modification, protein turnover, chaperones	PREDICTED: ubiquitin-conjugating enzyme E2 variant 1D-like [Glycine max]
F01_transcript/18314	--	--	Biological Process: proteolysis (GO:0006508);; Molecular Function: peptidase activity (GO:0008233);; Cellular Component: integral component of membrane (GO:0016021);;	--	--	--	--	--	Uncharacterized membrane protein At1g16860 GN=At1g16860 OS=Arabidopsis thaliana (Mouse-ear cress) PE=1 SV=1	S	Function unknown	PREDICTED: uncharacterized membrane protein At1g16860 [Vitis vinifera]
F01_transcript/3960	--	--	Cellular Component: cytosol (GO:0005829);;	--	--	--	--	--	--	S	Function unknown	unnamed protein product [Vitis vinifera]
F01_transcript/15782	[HJ]	--	--	K14487|0|tcc:TCM_007172|K14487 auxin responsive GH3 gene family | (RefSeq) Auxin-responsive GH3 family protein	ko04075:Plant hormone signal transduction	--	--	GH3 auxin-responsive promoter	Probable indole-3-acetic acid-amido synthetase GH3.1 GN=GH3.1 OS=Arabidopsis thaliana (Mouse-ear cress) PE=2 SV=1	S	Function unknown	Auxin-responsive GH3 family protein [Theobroma cacao]
F01_transcript/9717	[T]	Signal transduction mechanisms	Molecular Function: protein serine/threonine kinase activity (GO:0004674);; Molecular Function: ATP binding (GO:0005524);; Cellular Component: cytosol (GO:0005829);; Biological Process: protein phosphorylation (GO:0006468);; Biological Process: intracellular signal transduction (GO:0035556);;	K08867|0|pper:PRUPE_ppa003632mg|K08867 WNK lysine deficient protein kinase [EC:2.7.11.1] | (RefSeq) hypothetical protein	--	[R]	General function prediction only	Protein kinase domain;; Protein tyrosine kinase;; Oxidative-stress-responsive kinase 1 C-terminal domain	Probable serine/threonine-protein kinase WNK3 GN=WNK3 OS=Arabidopsis thaliana (Mouse-ear cress) PE=2 SV=1	T	Signal transduction mechanisms	unnamed protein product [Coffea canephora]
F01_transcript/10253	[J]	Translation, ribosomal structure and biogenesis	Molecular Function: translation elongation factor activity (GO:0003746);; Molecular Function: GTPase activity (GO:0003924);; Molecular Function: GTP binding (GO:0005525);; Biological Process: translational elongation (GO:0006414);; Cellular Component: chloroplast (GO:0009507);; Biological Process: ribosome disassembly (GO:0032790);;	K02355|0|vvi:100257414|K02355 elongation factor G | (RefSeq) elongation factor G-2, chloroplastic	--	[J]	Translation, ribosomal structure and biogenesis	Elongation factor Tu GTP binding domain;; Elongation factor G, domain IV;; Elongation Factor G, domain II;; Elongation factor G C-terminus;; Elongation factor Tu domain 2	Elongation factor G-1, chloroplastic (Precursor) GN=fusA1 OS=Glycine max (Soybean) PE=1 SV=2	J	Translation, ribosomal structure and biogenesis	PREDICTED: elongation factor G-2, chloroplastic [Vitis vinifera]
F01_transcript/995	--	--	Biological Process: activation of MAPKK activity (GO:0000186);; Molecular Function: MAP kinase kinase kinase activity (GO:0004709);; Molecular Function: ATP binding (GO:0005524);; Cellular Component: intracellular (GO:0005622);; Cellular Component: integral component of membrane (GO:0016021);;	--	--	[T]	Signal transduction mechanisms	Ethylene-responsive protein kinase Le-CTR1;; Protein tyrosine kinase;; Protein kinase domain	Serine/threonine-protein kinase CTR1 GN=CTR1 OS=Arabidopsis thaliana (Mouse-ear cress) PE=1 SV=1	T	Signal transduction mechanisms	PREDICTED: serine/threonine-protein kinase CTR1 [Vitis vinifera]
F01_transcript/24628	--	--	Molecular Function: zinc ion transmembrane transporter activity (GO:0005385);; Cellular Component: integral component of membrane (GO:0016021);; Biological Process: zinc II ion transmembrane transport (GO:0071577);;	K14709|1.4377e-129|sot:102588995|K14709 solute carrier family 39 (zinc transporter), member 1/2/3 | (RefSeq) zinc transporter 11	--	[P]	Inorganic ion transport and metabolism	ZIP Zinc transporter	Zinc transporter 2 (Precursor) GN=ZIP2 OS=Oryza sativa subsp. japonica (Rice) PE=2 SV=1	P	Inorganic ion transport and metabolism	PREDICTED: zinc transporter 2-like [Solanum tuberosum]
F01_transcript/3482	[T]	Signal transduction mechanisms	Molecular Function: protein serine/threonine kinase activity (GO:0004674);; Molecular Function: protein serine/threonine/tyrosine kinase activity (GO:0004712);; Molecular Function: ATP binding (GO:0005524);; Biological Process: mRNA processing (GO:0006397);; Biological Process: protein autophosphorylation (GO:0046777);;	--	--	[T]	Signal transduction mechanisms	Protein kinase domain;; Protein tyrosine kinase	Serine/threonine-protein kinase AFC2 GN=AFC2 OS=Arabidopsis thaliana (Mouse-ear cress) PE=1 SV=1	T	Signal transduction mechanisms	afc, putative [Ricinus communis]
F01_transcript/29539	--	--	--	--	--	--	--	Phloem protein 2	F-box protein PP2-A12 GN=P2A12 OS=Arabidopsis thaliana (Mouse-ear cress) PE=2 SV=1	S	Function unknown	unnamed protein product [Coffea canephora]
F01_transcript/16153	--	--	Molecular Function: transcription factor activity, sequence-specific DNA binding (GO:0003700);; Cellular Component: nucleus (GO:0005634);; Biological Process: regulation of transcription, DNA-templated (GO:0006355);; Molecular Function: sequence-specific DNA binding (GO:0043565);;	--	--	--	--	GRAS domain family	Scarecrow-like protein 13 GN=SCL13 OS=Arabidopsis thaliana (Mouse-ear cress) PE=2 SV=2	K	Transcription	PREDICTED: GRAS1 protein isoform X1 [Solanum lycopersicum]
F01_transcript/28000	[I]	Lipid transport and metabolism	Molecular Function: 2-C-methyl-D-erythritol 2,4-cyclodiphosphate synthase activity (GO:0008685);; Cellular Component: chloroplast stroma (GO:0009570);; Biological Process: chlorophyll biosynthetic process (GO:0015995);; Biological Process: carotenoid biosynthetic process (GO:0016117);;	K01770|2.63641e-109|pmum:103337568|K01770 2-C-methyl-D-erythritol 2,4-cyclodiphosphate synthase [EC:4.6.1.12] | (RefSeq) 2-C-methyl-D-erythritol 2,4-cyclodiphosphate synthase, chloroplastic	ko00900:Terpenoid backbone biosynthesis	--	--	YgbB family	2-C-methyl-D-erythritol 2,4-cyclodiphosphate synthase, chloroplastic (Precursor) OS=Arabidopsis thaliana (Mouse-ear cress) PE=1 SV=1	I	Lipid transport and metabolism	PREDICTED: 2-C-methyl-D-erythritol 2,4-cyclodiphosphate synthase, chloroplastic [Prunus mume]
F01_transcript/19763	--	--	Molecular Function: nucleic acid binding (GO:0003676);; Cellular Component: nucleus (GO:0005634);; Biological Process: regulation of transcription, DNA-templated (GO:0006355);; Biological Process: response to aluminum ion (GO:0010044);; Biological Process: response to acidic pH (GO:0010447);; Molecular Function: metal ion binding (GO:0046872);;	--	--	[R]	General function prediction only	--	Protein SENSITIVE TO PROTON RHIZOTOXICITY 1 GN=STOP1 OS=Arabidopsis thaliana (Mouse-ear cress) PE=2 SV=1	S	Function unknown	PREDICTED: protein SENSITIVE TO PROTON RHIZOTOXICITY 1 [Vitis vinifera]
F01_transcript/8791	[M]	Cell wall/membrane/envelope biogenesis	Biological Process: MAPK cascade (GO:0000165);; Molecular Function: MAP kinase activity (GO:0004707);; Molecular Function: ATP binding (GO:0005524);; Cellular Component: intracellular (GO:0005622);;	--	--	[T]	Signal transduction mechanisms	Protein kinase domain;; Protein tyrosine kinase;; Lipopolysaccharide kinase (Kdo/WaaP) family	Mitogen-activated protein kinase 10 OS=Oryza sativa subsp. japonica (Rice) PE=2 SV=2	T	Signal transduction mechanisms	PREDICTED: mitogen-activated protein kinase 20 isoform X1 [Vitis vinifera]
F01_transcript/20668	--	--	Molecular Function: nucleic acid binding (GO:0003676);; Molecular Function: metal ion binding (GO:0046872);;	--	--	[R]	General function prediction only	--	Protein indeterminate-domain 14 {ECO:0000303|PubMed:16784536} OS=Arabidopsis thaliana (Mouse-ear cress) PE=1 SV=1	S	Function unknown	PREDICTED: protein SHOOT GRAVITROPISM 5 [Vitis vinifera]
F01_transcript/24185	[P]	Inorganic ion transport and metabolism	Biological Process: response to oxidative stress (GO:0006979);; Cellular Component: chloroplast (GO:0009507);; Cellular Component: integral component of membrane (GO:0016021);; Molecular Function: L-ascorbate peroxidase activity (GO:0016688);; Molecular Function: heme binding (GO:0020037);; Biological Process: oxidation-reduction process (GO:0055114);; Biological Process: cellular oxidant detoxif…	K00434|0|vvi:100254009|K00434 L-ascorbate peroxidase [EC:1.11.1.11] | (RefSeq) probable L-ascorbate peroxidase 6, chloroplastic	ko00053:Ascorbate and aldarate metabolism;ko00480:Glutathione metabolism	--	--	Peroxidase	L-ascorbate peroxidase T, chloroplastic (Precursor) GN=APXT OS=Arabidopsis thaliana (Mouse-ear cress) PE=2 SV=2	P	Inorganic ion transport and metabolism	PREDICTED: L-ascorbate peroxidase T, chloroplastic-like isoform 2 [Glycine max]
F01_transcript/13260	--	--	Cellular Component: vacuolar membrane (GO:0005774);; Cellular Component: endoplasmic reticulum (GO:0005783);; Cellular Component: Golgi-associated vesicle (GO:0005798);; Cellular Component: integral component of membrane (GO:0016021);; Biological Process: protein processing (GO:0016485);;	K06171|0|vvi:100241276|K06171 nicastrin | (RefSeq) nicastrin	--	[TO]	--	Nicastrin;; Peptidase family M28	Nicastrin (Precursor) GN=At3g52640/At3g52650 OS=Arabidopsis thaliana (Mouse-ear cress) PE=2 SV=1	S	Function unknown	PREDICTED: nicastrin [Vitis vinifera]
F01_transcript/21562	[G]	Carbohydrate transport and metabolism	Molecular Function: transferase activity, transferring glycosyl groups (GO:0016757);;	--	--	[GC]	--	UDP-glucoronosyl and UDP-glucosyl transferase	UDP-glucose flavonoid 3-O-glucosyltransferase 6 {ECO:0000303|PubMed:18487633} OS=Fragaria ananassa (Strawberry) PE=1 SV=1	S	Function unknown	PREDICTED: UDP-glucose flavonoid 3-O-glucosyltransferase 6-like [Citrus sinensis]
F01_transcript/2271	--	--	--	--	--	--	--	Domain of unknown function (DUF4378);; DUF761-associated sequence motif	--	S	Function unknown	Uncharacterized protein TCM_019426 [Theobroma cacao]
F01_transcript/21779	--	--	Molecular Function: GTPase activity (GO:0003924);; Molecular Function: structural constituent of cytoskeleton (GO:0005200);; Molecular Function: GTP binding (GO:0005525);; Cellular Component: cytoplasm (GO:0005737);; Cellular Component: microtubule (GO:0005874);; Biological Process: microtubule-based process (GO:0007017);;	--	--	[Z]	Cytoskeleton	Tubulin/FtsZ family, GTPase domain;; Tubulin C-terminal domain	Tubulin beta-1 chain GN=TUBB1 OS=Glycine max (Soybean) PE=1 SV=1	Z	Cytoskeleton	tubulin beta chain, putative [Ricinus communis]
F01_transcript/26658	--	--	Molecular Function: microtubule binding (GO:0008017);;	K10436|1.11571e-159|pmum:103338390|K10436 microtubule-associated protein, RP/EB family | (RefSeq) microtubule-associated protein RP/EB family member 1A	--	[DZ]	--	EB1-like C-terminal motif;; Calponin homology (CH) domain	Microtubule-associated protein RP/EB family member 1A GN=EB1A OS=Arabidopsis thaliana (Mouse-ear cress) PE=1 SV=1	Z	Cytoskeleton	PREDICTED: microtubule-associated protein RP/EB family member 1A [Prunus mume]
F01_transcript/26832	--	--	Molecular Function: nucleotide binding (GO:0000166);; Biological Process: mRNA splicing, via spliceosome (GO:0000398);; Molecular Function: snRNA stem-loop binding (GO:0035614);;	--	--	--	--	RNA recognition motif. (a.k.a. RRM, RBD, or RNP domain)	Protein MATERNALLY EXPRESSED GENE 5 GN=MEG5 OS=Zea mays (Maize) PE=2 SV=1	S	Function unknown	PREDICTED: uncharacterized protein LOC100265772 isoform X1 [Vitis vinifera]
F01_transcript/10856	[T]	Signal transduction mechanisms	Molecular Function: protein serine/threonine kinase activity (GO:0004674);; Molecular Function: ATP binding (GO:0005524);; Cellular Component: cytosol (GO:0005829);; Biological Process: protein phosphorylation (GO:0006468);; Biological Process: intracellular signal transduction (GO:0035556);;	K08867|0|pop:POPTR_0012s08860g|K08867 WNK lysine deficient protein kinase [EC:2.7.11.1] | (RefSeq) POPTRDRAFT_806487; kinase family protein	--	[R]	General function prediction only	Protein kinase domain;; Protein tyrosine kinase;; Oxidative-stress-responsive kinase 1 C-terminal domain	Probable serine/threonine-protein kinase WNK2 GN=OSJNBa0068N01.12 OS=Oryza sativa subsp. japonica (Rice) PE=2 SV=1	T	Signal transduction mechanisms	kinase family protein [Populus trichocarpa]
F01_transcript/28385	--	--	Cellular Component: endoplasmic reticulum (GO:0005783);; Cellular Component: integral component of membrane (GO:0016021);;	--	--	--	--	--	--	S	Function unknown	unknown protein [Vitis vinifera]
F01_transcript/15765	[DPM]	--	Molecular Function: copper ion binding (GO:0005507);; Molecular Function: oxidoreductase activity, oxidizing metal ions (GO:0016722);; Molecular Function: bilirubin oxidase activity (GO:0047705);; Biological Process: oxidation-reduction process (GO:0055114);;	--	--	--	--	Multicopper oxidase;; Multicopper oxidase;; Multicopper oxidase	Multicopper oxidase LPR1 (Precursor) GN=LPR1 OS=Arabidopsis thaliana (Mouse-ear cress) PE=2 SV=1	Q	Secondary metabolites biosynthesis, transport and catabolism	hypothetical protein CISIN_1g008071mg [Citrus sinensis]
F01_transcript/24472	--	--	Molecular Function: protein disulfide isomerase activity (GO:0003756);; Cellular Component: endoplasmic reticulum (GO:0005783);; Biological Process: protein folding (GO:0006457);; Cellular Component: membrane (GO:0016020);; Biological Process: response to endoplasmic reticulum stress (GO:0034976);; Biological Process: cell redox homeostasis (GO:0045454);;	--	--	[S]	Function unknown	--	5&apos;-adenylylsulfate reductase-like 7 (Precursor) GN=APRL7 OS=Arabidopsis thaliana (Mouse-ear cress) PE=2 SV=1	O	Posttranslational modification, protein turnover, chaperones	PREDICTED: 5&apos;-adenylylsulfate reductase-like 5-like [Citrus sinensis]
F01_transcript/26779	[J]	Translation, ribosomal structure and biogenesis	Molecular Function: nucleotide binding (GO:0000166);; Molecular Function: nucleic acid binding (GO:0003676);;	K12893|2.21388e-112|pmum:103331973|K12893 splicing factor, arginine/serine-rich 4/5/6 | (RefSeq) serine/arginine-rich splicing factor RS41-like	ko03040:Spliceosome	[A]	RNA processing and modification	--	Serine/arginine-rich splicing factor RS40 GN=M7J2.130 OS=Arabidopsis thaliana (Mouse-ear cress) PE=1 SV=2	S	Function unknown	PREDICTED: arginine/serine-rich-splicing factor RSP41-like isoform X1 [Prunus mume]
F01_transcript/25044	--	--	Molecular Function: transferase activity (GO:0016740);;	--	--	--	--	SAM dependent carboxyl methyltransferase	Probable S-adenosylmethionine-dependent methyltransferase At5g38100 GN=At5g38100 OS=Arabidopsis thaliana (Mouse-ear cress) PE=2 SV=1	S	Function unknown	S-adenosyl-L-methionine-dependent methyltransferases superfamily protein, putative [Theobroma cacao]
F01_transcript/814	[P]	Inorganic ion transport and metabolism	Cellular Component: Golgi membrane (GO:0000139);; Molecular Function: magnesium ion binding (GO:0000287);; Molecular Function: phospholipid-translocating ATPase activity (GO:0004012);; Molecular Function: ATP binding (GO:0005524);; Cellular Component: trans-Golgi network (GO:0005802);; Cellular Component: plasma membrane (GO:0005886);; Cellular Component: integral component of membrane (GO:001602…	K01530|0|vvi:100249823|K01530 phospholipid-translocating ATPase [EC:3.6.3.1] | (RefSeq) probable phospholipid-transporting ATPase 4	--	[R]	General function prediction only	Phospholipid-translocating P-type ATPase C-terminal;; Phospholipid-translocating ATPase N-terminal;; Cation transport ATPase (P-type);; haloacid dehalogenase-like hydrolase	Putative phospholipid-transporting ATPase 4 GN=ALA4 OS=Arabidopsis thaliana (Mouse-ear cress) PE=3 SV=2	P	Inorganic ion transport and metabolism	unnamed protein product [Coffea canephora]
F01_transcript/7222	--	--	Biological Process: regulation of transcription, DNA-templated (GO:0006355);; Molecular Function: zinc ion binding (GO:0008270);;	--	--	--	--	FAR1 DNA-binding domain;; MULE transposase domain;; SWIM zinc finger	Putative protein FAR1-RELATED SEQUENCE 10 GN=FRS10 OS=Arabidopsis thaliana (Mouse-ear cress) PE=2 SV=2	S	Function unknown	PREDICTED: putative protein FAR1-RELATED SEQUENCE 10 [Prunus mume]
F01_transcript/27689	[S]	Function unknown	Cellular Component: endosome (GO:0005768);; Cellular Component: trans-Golgi network (GO:0005802);; Cellular Component: integral component of membrane (GO:0016021);;	--	--	--	--	Protein of unknown function (DUF502)	--	S	Function unknown	PREDICTED: uncharacterized protein LOC104244208 [Nicotiana sylvestris]
F01_transcript/14605	[S]	Function unknown	Biological Process: cellular protein modification process (GO:0006464);; Biological Process: lipoate biosynthetic process (GO:0009107);; Cellular Component: chloroplast stroma (GO:0009570);; Molecular Function: octanoyltransferase activity (GO:0016415);;	--	--	[S]	Function unknown	Uncharacterized ACR, YdiU/UPF0061 family	--	S	Function unknown	hypothetical protein JCGZ_22671 [Jatropha curcas]
F01_transcript/8321	--	--	Molecular Function: kinase activity (GO:0016301);; Biological Process: phosphorylation (GO:0016310);;	--	--	[T]	Signal transduction mechanisms	Phosphatidylinositol 3- and 4-kinase	Phosphatidylinositol 4-kinase gamma 7 GN=At2g03890 OS=Arabidopsis thaliana (Mouse-ear cress) PE=1 SV=2	S	Function unknown	unnamed protein product [Coffea canephora]
F01_transcript/18458	--	--	Molecular Function: protein serine/threonine phosphatase activity (GO:0004722);; Biological Process: protein dephosphorylation (GO:0006470);;	--	--	[T]	Signal transduction mechanisms	Protein phosphatase 2C	Probable protein phosphatase 2C 52 GN=At4g03415 OS=Arabidopsis thaliana (Mouse-ear cress) PE=2 SV=1	T	Signal transduction mechanisms	PREDICTED: probable protein phosphatase 2C 52 [Vitis vinifera]
F01_transcript/12700	--	--	Biological Process: cytokinesis by cell plate formation (GO:0000911);; Molecular Function: GTPase activity (GO:0003924);; Molecular Function: GTP binding (GO:0005525);; Cellular Component: cell plate (GO:0009504);;	--	--	[UR]	--	Dynamin family	Dynamin-related protein 5A GN=DRP5A OS=Arabidopsis thaliana (Mouse-ear cress) PE=2 SV=1	S	Function unknown	PREDICTED: dynamin-related protein 5A isoform X1 [Populus euphratica]
F01_transcript/3284	[L]	Replication, recombination and repair	Molecular Function: nucleic acid binding (GO:0003676);; Molecular Function: ATP-dependent RNA helicase activity (GO:0004004);; Molecular Function: ATP binding (GO:0005524);; Cellular Component: mitochondrion (GO:0005739);; Biological Process: RNA secondary structure unwinding (GO:0010501);; Cellular Component: membrane (GO:0016020);;	K12823|0|vvi:100264477|K12823 ATP-dependent RNA helicase DDX5/DBP2 [EC:3.6.4.13] | (RefSeq) ATP-dependent RNA helicase-like protein DB10	ko03040:Spliceosome	[A]	RNA processing and modification	Helicase conserved C-terminal domain;; DEAD/DEAH box helicase;; WW domain	ATP-dependent RNA helicase-like protein DB10 OS=Nicotiana sylvestris (Wood tobacco) PE=2 SV=1	L	Replication, recombination and repair	unnamed protein product [Vitis vinifera]
F01_transcript/30949	--	--	Biological Process: cytoplasmic translation (GO:0002181);; Molecular Function: structural constituent of ribosome (GO:0003735);; Biological Process: translational elongation (GO:0006414);; Cellular Component: cytosolic large ribosomal subunit (GO:0022625);; Cellular Component: preribosome, large subunit precursor (GO:0030687);; Molecular Function: large ribosomal subunit rRNA binding (GO:0070180)…	K02943|1.8161e-27|cic:CICLE_v10029621mg|K02943 large subunit ribosomal protein LP2 | (RefSeq) hypothetical protein	ko03010:Ribosome	[J]	Translation, ribosomal structure and biogenesis	60s Acidic ribosomal protein	60S acidic ribosomal protein P2 OS=Parthenium argentatum (Guayule rubber plant) PE=3 SV=1	J	Translation, ribosomal structure and biogenesis	hypothetical protein CICLE_v10029621mg [Citrus clementina]
F01_transcript/27326	--	--	Biological Process: regulation of ethylene-activated signaling pathway (GO:0010104);;	K09286|9.47454e-78|sot:102584874|K09286 EREBP-like factor | (RefSeq) ERF1; ethylene-responsive transcription factor 1-like	--	--	--	AP2 domain	Ethylene-responsive transcription factor 2 GN=ERF2 OS=Nicotiana tabacum (Common tobacco) PE=2 SV=1	K	Transcription	ethylene response factor 12 [Actinidia deliciosa]
F01_transcript/19728	[Z]	Cytoskeleton	--	K16616|0|tcc:TCM_030515|K16616 actin-related protein 8, plant | (RefSeq) Actin-related protein 8	--	[Z]	Cytoskeleton	Actin;; F-box domain;; F-box-like	Actin-related protein 8 GN=ARP8 OS=Arabidopsis thaliana (Mouse-ear cress) PE=2 SV=1	Z	Cytoskeleton	PREDICTED: actin-related protein 8 [Nicotiana tomentosiformis]
F01_transcript/25492	--	--	Cellular Component: cytoplasm (GO:0005737);; Molecular Function: queuine tRNA-ribosyltransferase activity (GO:0008479);; Biological Process: queuosine biosynthetic process (GO:0008616);;	--	--	[T]	Signal transduction mechanisms	Phosducin	--	S	Function unknown	hypothetical protein CICLE_v10016373mg [Citrus clementina]
F01_transcript/6771	--	--	Molecular Function: nucleotide binding (GO:0000166);; Molecular Function: nucleic acid binding (GO:0003676);;	K12893|9.23149e-86|vvi:100255266|K12893 splicing factor, arginine/serine-rich 4/5/6 | (RefSeq) serine/arginine-rich splicing factor RS31	ko03040:Spliceosome	[A]	RNA processing and modification	RNA recognition motif. (a.k.a. RRM, RBD, or RNP domain);; RNA recognition motif. (a.k.a. RRM, RBD, or RNP domain)	Serine/arginine-rich splicing factor RS31 GN=F21F14.30 OS=Arabidopsis thaliana (Mouse-ear cress) PE=1 SV=2	S	Function unknown	PREDICTED: serine/arginine-rich splicing factor RS31 isoform X1 [Vitis vinifera]
F01_transcript/20679	--	--	Biological Process: flavonoid biosynthetic process (GO:0009813);; Cellular Component: intracellular membrane-bounded organelle (GO:0043231);; Biological Process: flavonoid glucuronidation (GO:0052696);; Molecular Function: quercetin 3-O-glucosyltransferase activity (GO:0080043);; Molecular Function: quercetin 7-O-glucosyltransferase activity (GO:0080044);;	K13496|0|vvi:100248767|K13496 UDP-glucosyl transferase 73C [EC:2.4.1.-] | (RefSeq) UDP-glycosyltransferase 73C2	--	[GC]	--	UDP-glucoronosyl and UDP-glucosyl transferase	UDP-glycosyltransferase 73C3 GN=UGT73C3 OS=Arabidopsis thaliana (Mouse-ear cress) PE=2 SV=1	S	Function unknown	PREDICTED: UDP-glycosyltransferase 73C2 isoform X1 [Vitis vinifera]
F01_transcript/693	--	--	Cellular Component: nucleoplasm (GO:0005654);; Biological Process: regulation of transcription, DNA-templated (GO:0006355);; Biological Process: response to cold (GO:0009409);; Biological Process: response to blue light (GO:0009637);; Biological Process: response to far red light (GO:0010218);; Biological Process: temperature compensation of the circadian clock (GO:0010378);; Biological Process: …	K12124|0|vvi:100254197|K12124 GIGANTEA | (RefSeq) protein GIGANTEA	ko04712:Circadian rhythm - plant	--	--	--	Protein GIGANTEA GN=GI OS=Arabidopsis thaliana (Mouse-ear cress) PE=1 SV=2	S	Function unknown	PREDICTED: protein GIGANTEA [Vitis vinifera]
F01_transcript/27207	--	--	Biological Process: response to light stimulus (GO:0009416);; Cellular Component: photosystem I (GO:0009522);; Cellular Component: chloroplast thylakoid membrane (GO:0009535);; Biological Process: photosynthesis, light harvesting in photosystem I (GO:0009768);; Cellular Component: chloroplast envelope (GO:0009941);; Cellular Component: plastoglobule (GO:0010287);; Cellular Component: integral com…	K08915|8.87112e-168|mtr:MTR_4g015570|K08915 light-harvesting complex II chlorophyll a/b binding protein 4 | (RefSeq) light-harvesting complex I chlorophyll A/B-binding protein	ko00196:Photosynthesis - antenna proteins	--	--	Chlorophyll A-B binding protein	Chlorophyll a-b binding protein CP29.2, chloroplastic (Precursor) GN=LHCB4.2 OS=Arabidopsis thaliana (Mouse-ear cress) PE=1 SV=1	I	Lipid transport and metabolism	Chlorophyll a-b binding protein [Medicago truncatula]
F01_transcript/23227	[R]	General function prediction only	Molecular Function: transcription coactivator activity (GO:0003713);; Cellular Component: nucleus (GO:0005634);; Cellular Component: mitochondrion (GO:0005739);; Cellular Component: cytosol (GO:0005829);; Biological Process: regulation of transcription from RNA polymerase II promoter (GO:0006357);; Biological Process: glutamine metabolic process (GO:0006541);; Molecular Function: transferase acti…	K03152|0|tcc:TCM_031744|K03152 4-methyl-5(b-hydroxyethyl)-thiazole monophosphate biosynthesis | (RefSeq) Class I glutamine amidotransferase-like superfamily protein isoform 1	--	[RV]	--	DJ-1/PfpI family	Protein DJ-1 homolog B (Precursor) GN=DJ1B OS=Arabidopsis thaliana (Mouse-ear cress) PE=1 SV=1	S	Function unknown	hypothetical protein JCGZ_14725 [Jatropha curcas]
F01_transcript/16948	[M]	Cell wall/membrane/envelope biogenesis	Cellular Component: Golgi membrane (GO:0000139);; Cellular Component: mitochondrion (GO:0005739);; Cellular Component: endosome (GO:0005768);; Cellular Component: trans-Golgi network (GO:0005802);; Biological Process: homogalacturonan biosynthetic process (GO:0010289);; Cellular Component: integral component of membrane (GO:0016021);; Molecular Function: polygalacturonate 4-alpha-galacturonosyltr…	K13648|0|vvi:100258818|K13648 alpha-1,4-galacturonosyltransferase [EC:2.4.1.43] | (RefSeq) galacturonosyltransferase 8	ko00500:Starch and sucrose metabolism;ko00520:Amino sugar and nucleotide sugar metabolism	--	--	Glycosyl transferase family 8	Galacturonosyltransferase 8 GN=MJL12.8 OS=Arabidopsis thaliana (Mouse-ear cress) PE=1 SV=1	M	Cell wall/membrane/envelope biogenesis	Galacturonosyltransferase 8 -like protein [Gossypium arboreum]
F01_transcript/21594	--	--	--	--	--	--	--	--	--	S	Function unknown	PREDICTED: uncharacterized protein DDB_G0286299-like [Glycine max]
F01_transcript/16525	[E]	Amino acid transport and metabolism	Molecular Function: asparagine synthase (glutamine-hydrolyzing) activity (GO:0004066);; Cellular Component: cytosol (GO:0005829);; Biological Process: asparagine biosynthetic process (GO:0006529);; Biological Process: glutamine metabolic process (GO:0006541);; Biological Process: response to absence of light (GO:0009646);; Molecular Function: protein homodimerization activity (GO:0042803);;	K01953|0|sly:543875|K01953 asparagine synthase (glutamine-hydrolysing) [EC:6.3.5.4] | (RefSeq) LEAS1, AS1; asparagine synthetase 1	ko00250:Alanine, aspartate and glutamate metabolism	[E]	Amino acid transport and metabolism	Asparagine synthase;; Glutamine amidotransferase domain;; Glutamine amidotransferase domain;; Aluminium induced protein	Asparagine synthetase [glutamine-hydrolyzing] GN=AS OS=Triphysaria versicolor (Yellow owl&apos;s clover) PE=2 SV=3	E	Amino acid transport and metabolism	PREDICTED: asparagine synthetase [glutamine-hydrolyzing] [Solanum lycopersicum]
F01_transcript/20438	[M]	Cell wall/membrane/envelope biogenesis	Biological Process: defense response to insect (GO:0002213);; Molecular Function: protein serine/threonine kinase activity (GO:0004674);; Molecular Function: ATP binding (GO:0005524);; Biological Process: protein phosphorylation (GO:0006468);; Biological Process: defense response to fungus (GO:0050832);;	--	--	[T]	Signal transduction mechanisms	Protein tyrosine kinase;; Protein kinase domain	Protein kinase APK1B, chloroplastic (Precursor) GN=APK1B OS=Arabidopsis thaliana (Mouse-ear cress) PE=2 SV=2	T	Signal transduction mechanisms	hypothetical protein JCGZ_05291 [Jatropha curcas]
F01_transcript/22995	[CO]	--	Cellular Component: integral component of membrane (GO:0016021);; Biological Process: cytochrome complex assembly (GO:0017004);; Biological Process: oxidation-reduction process (GO:0055114);;	--	--	--	--	Cytochrome C biogenesis protein transmembrane region	Cytochrome c-type biogenesis ccda-like chloroplastic protein 2 (Precursor) GN=CCDA2 OS=Oryza sativa subsp. japonica (Rice) PE=3 SV=1	O	Posttranslational modification, protein turnover, chaperones	PREDICTED: cytochrome c-type biogenesis ccda-like chloroplastic protein isoform X2 [Vitis vinifera]
F01_transcript/28485	--	--	Cellular Component: chloroplast (GO:0009507);; Molecular Function: allene-oxide cyclase activity (GO:0046423);;	K10525|8.26107e-78|pxb:103947146|K10525 allene oxide cyclase [EC:5.3.99.6] | (RefSeq) allene oxide cyclase 4, chloroplastic-like	ko00592:alpha-Linolenic acid metabolism	--	--	--	Allene oxide cyclase 4, chloroplastic (Precursor) GN=AOC4 OS=Arabidopsis thaliana (Mouse-ear cress) PE=2 SV=1	S	Function unknown	allene oxide cyclase [Camellia sinensis]
F01_transcript/25280	[R]	General function prediction only	Molecular Function: zinc ion binding (GO:0008270);; Molecular Function: oxidoreductase activity (GO:0016491);; Molecular Function: cobalt ion binding (GO:0050897);; Biological Process: oxidation-reduction process (GO:0055114);;	--	--	[Q]	Secondary metabolites biosynthesis, transport and catabolism	Zinc-binding dehydrogenase;; Alcohol dehydrogenase GroES-like domain;; Zinc-binding dehydrogenase	Alcohol dehydrogenase GN=ADH OS=Malus domestica (Apple) PE=2 SV=1	C	Energy production and conversion	PREDICTED: alcohol dehydrogenase 1B [Nicotiana sylvestris]
F01_transcript/3666	[R]	General function prediction only	Biological Process: metabolic process (GO:0008152);; Molecular Function: oxidoreductase activity (GO:0016491);;	--	--	--	--	Protein kinase domain;; Protein tyrosine kinase;; WD domain, G-beta repeat;; Anaphase-promoting complex subunit 4 WD40 domain	Protein SPA1-RELATED 4 GN=SPA4 OS=Arabidopsis thaliana (Mouse-ear cress) PE=1 SV=1	T	Signal transduction mechanisms	SPA1-related 3 isoform 2 [Theobroma cacao]
F01_transcript/10775	--	--	--	--	--	[R]	General function prediction only	--	--	S	Function unknown	hypothetical protein POPTR_0002s26310g [Populus trichocarpa]
F01_transcript/21509	--	--	Cellular Component: chloroplast thylakoid membrane (GO:0009535);; Cellular Component: chloroplast envelope (GO:0009941);;	--	--	--	--	--	Uncharacterized protein At4g37920, chloroplastic (Precursor) GN=At4g37920 OS=Arabidopsis thaliana (Mouse-ear cress) PE=1 SV=2	S	Function unknown	PREDICTED: uncharacterized protein At4g37920, chloroplastic [Vitis vinifera]
F01_transcript/31684	--	--	Cellular Component: SAGA complex (GO:0000124);; Molecular Function: chromatin binding (GO:0003682);; Molecular Function: transcription coactivator activity (GO:0003713);; Cellular Component: nuclear pore (GO:0005643);; Biological Process: regulation of transcription from RNA polymerase II promoter (GO:0006357);; Biological Process: transcription elongation from RNA polymerase II promoter (GO:0006…	K11368|1.35816e-52|tcc:TCM_017190|K11368 enhancer of yellow 2 transcription factor | (RefSeq) Enhancer of yellow 2 isoform 1	--	[K]	Transcription	Transcription factor e(y)2	Transcription and mRNA export factor SUS1 {ECO:0000255|HAMAP-Rule:MF_03046} GN=At3g27100 OS=Arabidopsis thaliana (Mouse-ear cress) PE=3 SV=1	K	Transcription	PREDICTED: transcription and mRNA export factor SUS1 {ECO:0000255|HAMAP-Rule:MF_03046} [Nicotiana tomentosiformis]
F01_transcript/12798	[S]	Function unknown	Cellular Component: integral component of membrane (GO:0016021);; Biological Process: transmembrane transport (GO:0055085);;	--	--	--	--	OPT oligopeptide transporter protein	Metal-nicotianamine transporter YSL3 GN=YSL3 OS=Arabidopsis thaliana (Mouse-ear cress) PE=2 SV=1	S	Function unknown	PREDICTED: metal-nicotianamine transporter YSL3-like isoform X1 [Nicotiana sylvestris]
F01_transcript/3781	--	--	Molecular Function: actin binding (GO:0003779);;	K17275|0|sly:101262133|K17275 plastin-1 | (RefSeq) fimbrin-1	--	[Z]	Cytoskeleton	Calponin homology (CH) domain;; CH-like domain in sperm protein;; CAMSAP CH domain;; Calponin homology (CH) domain	Fimbrin-1 {ECO:0000303|PubMed:11123801} OS=Arabidopsis thaliana (Mouse-ear cress) PE=1 SV=2	Z	Cytoskeleton	unnamed protein product [Coffea canephora]
F01_transcript/7233	[P]	Inorganic ion transport and metabolism	Molecular Function: voltage-gated chloride channel activity (GO:0005247);; Biological Process: chloride transport (GO:0006821);; Cellular Component: integral component of membrane (GO:0016021);; Biological Process: regulation of anion transmembrane transport (GO:1903959);;	K05016|0|cit:102628105|K05016 chloride channel 7 | (RefSeq) chloride channel protein CLC-b	--	[P]	Inorganic ion transport and metabolism	Voltage gated chloride channel;; CBS domain	Chloride channel protein CLC-b GN=MYF5.4 OS=Arabidopsis thaliana (Mouse-ear cress) PE=1 SV=1	P	Inorganic ion transport and metabolism	hypothetical protein CICLE_v10014341mg [Citrus clementina]
F01_transcript/4250	--	--	Molecular Function: microtubule motor activity (GO:0003777);; Molecular Function: ATP binding (GO:0005524);; Cellular Component: kinesin complex (GO:0005871);; Cellular Component: microtubule (GO:0005874);; Biological Process: microtubule-based movement (GO:0007018);; Molecular Function: microtubule binding (GO:0008017);; Cellular Component: integral component of membrane (GO:0016021);; Molecular…	K10393|0|vvi:100240940|K10393 kinesin family member 2/24 | (RefSeq) kinesin-like protein KIN-13A	--	[Z]	Cytoskeleton	Kinesin motor domain;; Microtubule binding	Kinesin-13A GN=KINESIN-13A OS=Arabidopsis thaliana (Mouse-ear cress) PE=1 SV=1	Z	Cytoskeleton	PREDICTED: kinesin-13A [Vitis vinifera]
F01_transcript/27486	--	--	Cellular Component: chloroplast (GO:0009507);; Molecular Function: allene-oxide cyclase activity (GO:0046423);;	K10525|1.00477e-107|cit:102622874|K10525 allene oxide cyclase [EC:5.3.99.6] | (RefSeq) allene oxide cyclase 4, chloroplastic	ko00592:alpha-Linolenic acid metabolism	--	--	Allene oxide cyclase	Allene oxide cyclase 4, chloroplastic (Precursor) GN=AOC4 OS=Arabidopsis thaliana (Mouse-ear cress) PE=2 SV=1	S	Function unknown	allene oxide cyclase [Camellia sinensis]
F01_transcript/9654	[T]	Signal transduction mechanisms	--	--	--	[S]	Function unknown	U-box domain	U-box domain-containing protein 5 GN=PUB5 OS=Arabidopsis thaliana (Mouse-ear cress) PE=3 SV=3	S	Function unknown	PREDICTED: U-box domain-containing protein 5-like isoform X1 [Vitis vinifera]
[truncated: 18,101 more rows]

## Sheet: Table S2
Table S2. Simple sequences repeat (SSR) of Actinidia latifolia
#Gene_ID	SSR_nr	SSR_type	SSR	Size	SSR_Start	SSR_End		FPr1(5'-3')	Tm	Size	RPr1(5'-3')	Tm	Size	PSize	PStart	PEnd	FPr2(5'-3')	Tm	Size	RPr2(5'-3')	Tm	Size	PSize	PStart	PEnd	FPr3(5'-3')	Tm	Size	RPr3(5'-3')	Tm	Size	PSize	PStart	PEnd
F01_transcript/0	1	p1	(A)10	10	1675	1684	--
F01_transcript/0	2	p1	(A)11	11	1933	1943	--
[truncated: 11,964 more rows]

## Sheet: Table S3
Table S3. The relationship between different modules and ascorbic acid content
[truncated: 5,156 more rows]

[truncated: 2 more sheets: Table S4, Table S5]
